# Supplementary material for: A qualitative focus group study of perceived barriers and benefits to exercise by self-described exercise status among older adults living with HIV
Source: PubMed Central journal article supplement — BMJ Open. 2019 Mar 7;9(3):e026294. doi: 10.1136/bmjopen-2018-026294 (PMC6429843; doi:10.1136/bmjopen-2018-026294), 2019-03-07
Supplement: bmjopen-2018-026294.draft_revisions.pdf [file bmjopen-2018-026294.draft_revisions.pdf]

# BMJ Open

BMJ Open is committed to open peer review. As part of this commitment we make the peer review history of every article we publish publicly available.

When an article is published we post the peer reviewers' comments and the authors' responses online. We also post the versions of the paper that were used during peer review. These are the versions that the peer review comments apply to.

The versions of the paper that follow are the versions that were submitted during the peer review process. They are not the versions of record or the final published versions. They should not be cited or distributed as the published version of this manuscript.

BMJ Open is an open access journal and the full, final, typeset and author-corrected version of record of the manuscript is available on our site with no access controls, subscription charges or pay-per-view fees (<http://bmjopen.bmj.com>).

If you have any questions on BMJ Open's open peer review process please email [info.bmjopen@bmj.com](mailto:info.bmjopen@bmj.com)

# BMJ Open

## Perceived Barriers and Benefits to Exercise by Self-Described Exercise Status, among Older Adults Living with HIV

|                               |                                                                                                                                                                                                                                                                                                                                                                                                 |
|-------------------------------|-------------------------------------------------------------------------------------------------------------------------------------------------------------------------------------------------------------------------------------------------------------------------------------------------------------------------------------------------------------------------------------------------|
| Journal:                      | <i>BMJ Open</i>                                                                                                                                                                                                                                                                                                                                                                                 |
| Manuscript ID                 | bmjopen-2018-026294                                                                                                                                                                                                                                                                                                                                                                             |
| Article Type:                 | Research                                                                                                                                                                                                                                                                                                                                                                                        |
| Date Submitted by the Author: | 24-Aug-2018                                                                                                                                                                                                                                                                                                                                                                                     |
| Complete List of Authors:     | Johs, Nikolas; University of Colorado, School of Medicine<br>Kellar-Guenther, Yvonne; Center for Public Health Innovation, CI International; University of Colorado, School of Public Health<br>Jankowski , Catherine M. ; University of Colorado, College of Nursing<br>Neff, Hadlai; University of Colorado, School of Public Health<br>Erlandson, Kristine; University of Colorado, Medicine |
| Keywords:                     | HIV & AIDS < INFECTIOUS DISEASES, GERIATRIC MEDICINE, PUBLIC HEALTH                                                                                                                                                                                                                                                                                                                             |
|                               |                                                                                                                                                                                                                                                                                                                                                                                                 |

SCHOLARONE™  
Manuscripts

Peer Review Only

1  
2  
3 **Perceived Barriers and Benefits to Exercise by Self-Described Exercise Status, among**  
4  
5 **Older Adults Living with HIV**  
6  
7

8  
9 Nikolas A. Johs<sup>1</sup>, Yvonne Kellar-Guenther<sup>2,3</sup>, Catherine M. Jankowski<sup>4</sup>, Hadlai Neff<sup>3</sup>, Kristine M.  
10 Erlandson<sup>5</sup>  
11

- 12  
13  
14 1. University of Colorado-Anschutz Medical Campus, School of Medicine, Aurora, CO  
15 2. Center for Public Health Innovation, CI International, Littleton, CO  
16 3. University of Colorado-Anschutz Medical Campus, School of Public Health, Aurora, CO  
17 4. University of Colorado-Anschutz Medical Campus, College of Nursing, Aurora, CO  
18 5. University of Colorado-Anschutz Medical Campus, Department of Medicine, Divisions of  
19 Infectious Diseases and Geriatric Medicine, Aurora, CO  
20

21 *Corresponding Author:*

22 Kristine M. Erlandson, MD MS

23 12700 E 19<sup>th</sup> Ave; Mail Stop B168

24 Aurora, CO 80045

25 (p) 303-724-4941; (f) 303-724-4926

26 [Kristine.Erlandson@ucdenver.edu](mailto:Kristine.Erlandson@ucdenver.edu)  
27  
28  
29  
30  
31  
32  
33

34 Word Count:

35 Abstract 286

36 Manuscript 3906  
37  
38

39 Running Head: Barriers and Benefits to Exercise in HIV

40 Key word: physical activity, exercise, aging, HIV, qualitative  
41  
42  
43  
44  
45  
46  
47  
48  
49  
50  
51  
52  
53  
54  
55  
56  
57  
58  
59  
60

## Abstract

**Objectives:** Although exercise interventions have been shown to improve health outcomes among older people with HIV (PLWH), this population remains highly sedentary. The purpose of this study was to examine the differences in perceived barriers and benefits to exercise among older PLWH by self-identified exercise status.

**Design:** Five focus groups were conducted among PLWH: two groups of exercising men, two groups of non-exercising men, and one group of women (mixed exercisers and non-exercisers). Themes were analyzed in relation to the social ecological model (SEM), utilizing a combination of grounded theory and content analysis.

**Setting:** Patients were recruited from an academic medical center HIV clinic and community locations.

**Participants:** PLWH aged 50 or older, diagnosed with HIV for at least two years, with no other health conditions that would preclude exercise.

**Primary and Secondary Outcome Measures:** Determine facilitators, barriers, and ideal environment for exercise or physical activity and whether these differ between older PLWH who self-identify as an exerciser or non-exerciser.

**Results:** Among 25 men (11 exercisers and 14 non-exercisers) and 4 women (3 non-exercisers and 1 exerciser), non-exercisers mentioned fewer benefits to exercise (n=46) than exercisers (n=75). Exercisers emphasized positive reinforcement, positive mood change and increased energy as benefits of exercise; interpersonal benefits of exercise were also discussed twice as often for exercisers than non-exercisers. Non-exercisers emphasized barriers to exercise including lack of motivation, lack of self-efficacy, and a negative perception of gym culture. Non-exercisers identified a need for age-appropriate activities as a feature of an ideal exercise

1  
2  
3 environment. Both groups identified time, cost, and health-related challenges as barriers to  
4  
5 exercise.  
6  
7

8 **Conclusions:** Unique exercise barriers and benefits by self-identified exercise status provide  
9  
10 important insights into the design of future interventions to initiate and maintain exercise.  
11  
12  
13  
14  
15  
16  
17  
18  
19  
20  
21  
22  
23  
24  
25  
26  
27  
28  
29  
30  
31  
32  
33  
34  
35  
36  
37  
38  
39  
40  
41  
42  
43  
44  
45  
46  
47  
48  
49  
50  
51  
52  
53  
54  
55  
56  
57  
58  
59  
60

For peer review only

## Article Summary

### Strengths and Limitations of This Study:

- We explore the perspectives of older men living with HIV on exercise among those with and without established exercise habits, which has not previously been reported in the literature
- This qualitative study used a combination of grounded theory and content analysis in the coding of transcripts, with an initial codebook informed from prior focus groups in this population as well as themes from the literature
- All coding was done by hand by individual investigators, and all codes were reviewed by a third team member until a group consensus was reached
- Results of the analysis were shared with members of the community advisory board for further validation of the data
- Due to difficulty in recruiting women, data saturation of themes was not reached in this group and was only peripherally used to inform interpretation of the data

## Introduction:

With the advent of highly active antiretroviral therapy, nearly half of people living with HIV (PLWH) now are over 50 years old, and this number is expected to increase to 70% by 2030<sup>1</sup>. Higher rates of age-associated comorbidities among older PLWH, such as cardiovascular disease, osteoporosis, and neurocognitive disorders<sup>2</sup>, are likely due in part to chronic inflammation, seen with even suppressed HIV<sup>3</sup>. Furthermore, older adults with HIV often face higher rates of depression, social isolation, and the impact of both age-related and HIV-related stigma, which contribute to health disparities<sup>4-6</sup>. Exercise or physical activity appears to be a safe and effective way to address many comorbidities in older PLWH<sup>7</sup>. Exercise interventions have been shown to improve cardiovascular fitness, bone density, body composition, functional status, neurocognitive function, and health-related quality of life in PLWH<sup>8-11</sup>. Despite the importance of physical activity and exercise to health among older PLWH, high rates of sedentary behavior are common<sup>12</sup>.

The factors that drive health behaviors in a population are often described through the social ecological model (SEM). The SEM posits that health behavior is influenced by a number of personal, social, organizational, community, and policy level factors that interact, and cannot be fully understood or enacted upon without addressing all potential levels of influence<sup>13 14</sup>. Indeed, the SEM model has been used extensively in the exercise health behavior literature to investigate the many competing factors that influence physical activity<sup>15-18</sup>. Similarly, a number of qualitative studies have explored attitudes towards exercise or physical activity among diverse populations of PLWH and have identified factors influencing exercise or routine physical activity, such as physical health and self-efficacy (personal), social support and competing priorities such as caregiver responsibilities (social), and accessibility of safe environments for exercise (community)<sup>19-24</sup>. However, these studies did not distinguish the viewpoints of participants with, and without, established exercise habits. Thus, the focus of this qualitative study was to explore whether the facilitators, barriers, and ideal environment for exercise or

1  
2  
3 physical activity differ between older PLWH who self-identify as an exerciser compared to a  
4 non-exerciser, with the hypothesis that many factors directly influencing exercise behavior  
5 would span the SEM levels. Identification of the key differences influencing behavior between  
6 PLWH who do and do not exercise will inform multi-level interventions to most effectively  
7 transition non-exercisers into self-identified exercisers.  
8  
9  
10  
11  
12  
13  
14  
15

### 16 **Methods:**

17  
18 Participants were recruited from a University-based HIV primary care clinic and from local HIV  
19 community groups. Eligible participants were diagnosed with HIV for  $\geq 2$  years, aged  $\geq 50$  years,  
20 regularly seeing a physician for HIV care, taking antiretroviral therapy for  $\geq 6$  months, and did  
21 not have a major disability that would preclude exercise. Participants self-identified exercise  
22 behavior in response to the question, "are you currently exercising regularly, meaning more than  
23 2 days per week, on most weeks?". All participants provided written informed consent. The  
24 study was approved by the Colorado Multi-Institutional Review Board and was registered on  
25 Clinical Trials.gov (NCT02404792).  
26  
27  
28  
29  
30  
31  
32  
33

34  
35 Five focus groups were conducted in June 2016 including: two groups of men that self-  
36 identified as exercisers; two groups of men that self-identified as non-exercisers; and a group of  
37 women (exercisers and non-exercisers). The focus groups took place in a private conference  
38 room in an outpatient medical facility located near the clinic where the majority of participants  
39 obtained care. All five focus groups were conducted by a physician who works in the HIV  
40 primary care clinic (KME); notes were taken by a second investigator with no treatment  
41 relationship to the participants (NAJ). Participants completed a short demographic survey prior  
42 to the focus group session. Each session lasted approximately two hours. A semi-structured  
43 guide of open-ended questions informed by the literature and prior work by our group<sup>25</sup> was  
44 used to facilitate the discussion. All focus groups were audio-recorded and transcribed verbatim  
45  
46  
47  
48  
49  
50  
51  
52  
53  
54  
55  
56  
57  
58  
59  
60



1  
2  
3 by a transcriptionist not involved in the study. Participants were provided with a \$20 gift card  
4 after completion of the focus group.  
5

6  
7 The transcripts were analyzed individually by two members of the study team involved in  
8 the focus groups, and another team member who was not involved. First, rather than starting  
9 with a theory like SEM, the team created a codebook using grounded theory and content  
10 analysis approaches in combination to identify broad themes related to facilitators and barriers  
11 to exercise for older PLWH. A deductive approach was used, with a list of key domains  
12 developed from a prior set of focus groups (in PLWH), as well as prior literature for exercise  
13 barriers in older adults and PLWH<sup>25</sup>. New codes identified during the analysis were added to the  
14 coding scheme and, utilizing a constant-comparison approach, the early transcripts were  
15 reanalyzed after the final codebook was determined.  
16  
17

18  
19 Coding and analyses were completed by hand, independently by each investigator, and  
20 then codes were compared; differences were resolved by group consensus. Categories were  
21 structured by benefits and motivators to exercise, barriers to exercise, ideal conditions for  
22 exercise, and other. These categories were then analyzed and compared between the self-  
23 identified exercisers and non-exercisers. In the results, it was noted when a code was  
24 mentioned by all four focus groups or by both focus groups of each type (exercisers or non-  
25 exercisers). Codes that were unique to only one type (exercisers or non-exercisers) were then  
26 compared to the literature to determine if saturation was reached. Challenges with recruitment  
27 of women to the study did not allow for subdivision into self-identified exercisers and non-  
28 exercisers, and because data saturation could not be reached, themes from this group were  
29 used to support findings of the other groups. Quotes from the interviews are provided for insight  
30 into the identified themes.  
31  
32  
33  
34  
35  
36  
37  
38  
39  
40  
41  
42  
43  
44  
45  
46  
47  
48  
49  
50

51  
52  
53  
54 *Patient and Public Involvement:*  
55  
56  
57  
58  
59  
60

1  
2  
3 Member checking involved review and discussion of the results with seven men who are part of  
4 our community advisory group. These men reflect characteristics of the focus group  
5 participants and provided input as to whether the focus group results resonated with their  
6 experiences.  
7  
8  
9  
10

### 11 12 13 **Results:**

14  
15  
16 Twenty-nine participants (Table 1) from 5 focus groups included 11 men who self-  
17 identified as exercisers (focus groups n=6, n=5), 14 men who self-identified as non-exercisers  
18 (focus groups n=8, n=6), and 4 women. Briefly, among the men, the median age was 57 years,  
19 the majority were white and college-educated men who have sex with men. The women had a  
20 median age of 56 years, the majority having some college education and sexual preference of  
21 men. Male participants had been living with HIV for approximately 20 years (range of 4 to 33  
22 years), and female participants for 15 years (range 4 to 27 years).  
23  
24  
25  
26  
27  
28  
29  
30  
31

### 32 **Motivators to and Benefits of Exercise**

33  
34  
35 A variety of motivators to exercise and benefits of exercise were reported by both  
36 exercising and non-exercising groups although, overall, non-exercisers mentioned far fewer  
37 benefits to exercise (n=46) than exercisers (n=75), Table 2. A shared theme was the benefit of  
38 being able to think more clearly, or a sense of self-reflection or meditation. For the exercisers,  
39 this was more often related to feeling mindful during exercise, “swimming is something like  
40 putting yourself in a meditative state. Which is relaxing and you know...it gives me a chance just  
41 to zone out by myself.” For the non-exercising group, they talked about how physical activity  
42 helped them to think more clearly, “...there is a physiological and mental aspect to it that is very  
43 refreshing. It [exercising] is good for your soul... It clears your mind”. Exercisers perceived a  
44 benefit on mood, mental health, and coping with stress. As one participant mentioned, “I was  
45 diagnosed bipolar about 18 years ago. And so I use exercise as a coping mechanism for when  
46  
47  
48  
49  
50  
51  
52  
53  
54  
55  
56  
57  
58  
59  
60

1  
2  
3 I'm depressed or when I'm manic...It grounds me". Exercise also helped to combat the effects of  
4 aging: "Well, I'm 60 and I didn't want anything headed south on me!".

5  
6  
7 The social aspects of exercise were recognized more commonly than the personal  
8 benefits in all groups, and nearly twice as often among exercisers: "...having a friend or a  
9 buddy to exercise with is a great motivator" (exerciser). Exercisers placed more importance on  
10 the motivating encouragement or positive reinforcement from family or peers: "Especially like  
11 people at church who I see every Sunday and they are like, keep doing it. Keep going. Keep  
12 going. You look great. But that positive reinforcement you know, building my self-esteem a little  
13 bit more and you know, remembering that makes me want to walk that half mile ...Cause then I  
14 know it's paying off" (exerciser). Non-exercisers reported the influence of the social  
15 environment or the community on motivation to start exercise. For example, one participant  
16 mentioned how much more motivated he was to be active when his community was more  
17 active, "not everybody can live in the mountain towns [more physically active towns] and they  
18 don't want to. But anyway I had a great network of friends up there. Socially and sports-wise"  
19 (non-exerciser). Additional motivators and benefits are detailed in Table 2.  
20  
21  
22  
23  
24  
25  
26  
27  
28  
29  
30  
31  
32  
33  
34  
35  
36

### 37 **Barriers to Exercise**

38  
39 Physical health, fatigue, injuries or hospitalizations were mentioned among both groups,  
40 but more commonly identified as barriers among non-exercisers. One patient related the  
41 physical health barriers following a hospitalization: "I ended up being in the hospital for a week  
42 with septic shock...up until that time, I was 100% fine...and then the next thing I know, I'm in the  
43 ICU and obviously after a week in the hospital, I was much weaker. But when I came home it  
44 was like wait, why am I getting winded? So my mind said I should be able to continue doing  
45 things at the level I was before. But my body wasn't doing that" (non-exerciser). Other themes  
46 discussed by both groups included having a lack of time ("work is just really an impediment",  
47  
48  
49  
50  
51  
52  
53  
54  
55  
56  
57  
58  
59  
60

1  
2  
3 non-exerciser), depression, and loss of a personal relationship (“when he left me, it zapped  
4 everything”; non-exerciser).  
5  
6

7 Prominent barriers discussed almost exclusively by the non-exercising group included:  
8 a lack of motivation or discipline, lack of a daily routine, or difficulty related to fatigue or other life  
9 struggles; “Sometimes it takes everything I have to get out of bed in the morning”. Poor exercise  
10 self-efficacy was also more commonly discussed among non-exercisers than exercisers. One  
11 participant described a strong desire to be active for health reasons, but faced challenges to  
12 establishing a regular workout routine, “But the motivation to believe in myself and to have the  
13 ability to know that I can do it again, would probably be the hardest part for me.” This also  
14 coincided with a lack of familiarity of exercise or lack of knowledge of newer technology, “First of  
15 all, there are technological advances that have happened since I spent any time in a gym. And I  
16 think...that when it comes to being inside a gym or something, I don’t know what the best order  
17 of machines would be. Or what is going to work for you.” Age-related barriers further contributed  
18 to low exercise self-efficacy. When one participant asked the group if he was the only one that  
19 felt fatigue, another replied, “I don’t have a bundle of energy. I’m not bouncing off the walls, you  
20 know? Twenty years ago, I used to bounce off the walls cause I had so much [energy]...”. One  
21 group particularly bemoaned a lack of age-appropriate activities at gyms: “...they are not going  
22 to be able to fine-tune something that is more appropriate for someone my age or with various  
23 health issues and things like that.”  
24  
25  
26  
27  
28  
29  
30  
31  
32  
33  
34  
35  
36  
37  
38  
39  
40  
41  
42

43 Uniquely identified in the non-exercising groups was a negative perception of gym  
44 culture. Participants expressed disdain for younger gym members who were perceived to be  
45 more focused on their looks than health (“posers” was the term used by one participant) and for  
46 the general environment: “Another thing that really turned me off was during a couple decades  
47 period of time, the gym culture changed dramatically from just being a work-out place, to being  
48 these entertainment centers with pounding music and all this fancy gym clothes...one day I just  
49 walked in and the music was pounding and I said, you know, you got all these frickin’ queens  
50  
51  
52  
53  
54  
55  
56  
57  
58  
59  
60

1  
2  
3 posing like peacocks in the mirrors and I've had it." The gym was also perceived as a business  
4 more focused on selling a product than health, "I don't think they are interested in my health as  
5 much as they are trying to sell themselves and make money. I don't like that at all. Because  
6 they are not interested in me". In contrast to these negative perceptions expressed by non-  
7 exercisers, exercisers commented more on the aspects of community within the gym that they  
8 enjoyed.  
9  
10  
11  
12  
13  
14

15  
16 Exercisers noted a lack of social support as a barrier to exercise. When talking about a  
17 time period prior to being an exerciser, a participant related, "I had never lived for me. It was  
18 always about my partner or my parents or my teachers, or my friends. My whole life - 50 years -  
19 had revolved around what somebody else wanted for me." Another expression of this theme  
20 was related to simply not having a social group with which to participate in activity, "...Before my  
21 partner passed away, we used to like to go up in the mountains and go hiking. But right now it is  
22 like...I don't know anybody around here that enjoys doing it. So this summer I haven't gone  
23 hiking at all. I take [my dog] out for his walks. But it's like...I just, you know...I don't know  
24 anybody to go hiking with so...".  
25  
26  
27  
28  
29  
30  
31  
32  
33  
34  
35  
36

### 37 **Ideal Environment for Exercise**

38  
39 When participants were asked to describe ideal exercise conditions, many of the  
40 answers related back to the motivators and barriers (Table 2). For both groups, cost and access  
41 were important factors. Multiple groups mentioned benefits of the insurance-sponsored  
42 programs or reduced-cost community centers, or expressed intentions of investigating such  
43 programs. Type of exercise was also related to cost for some participants, "I actually kind of  
44 enjoy going out for a run. It doesn't cost me anything. It's free" (exerciser). Interpersonal and  
45 social factors were important factors for both groups, with every group describing an aspect of  
46 the social environment that they thought was important, whether an "exercise buddy" or a  
47  
48  
49  
50  
51  
52  
53  
54  
55  
56  
57  
58  
59  
60

1  
2  
3 welcoming environment: “If someone was genuinely interested in working with me and when I  
4 say, generally interested in it from a social perspective. You know?” (non-exerciser).  
5  
6

7 We also posed the question of what would be the preferred exercise community.  
8  
9 Opinions differed across groups: some felt that they would appreciate having a gym that  
10 catered to PLWH exclusively whereas others were opposed to this idea. Non-exercisers  
11 preferred a gym or program that catered to older adults: “...having people around you that are of  
12 a similar age. You know? You don't feel ...I don't know if it's threatened or whatever, but you  
13 just feel more at ease. You know?” Non-exercisers were also more interested in the types of  
14 activities available at the gym and the facilities, and in particular, mentioned the importance of  
15 having age-appropriate activities. When describing an acceptable gym format, one participant  
16 stated, “what I liked about [the gym]... all the machines are in a circle and it's just for seniors”.  
17  
18 This group also mentioned dedicated instruction as something that would be a part of their ideal  
19 gym, or clear instructions that would help them to get started if they were not familiar with a  
20 given exercise.  
21  
22  
23  
24  
25  
26  
27  
28  
29  
30  
31  
32  
33  
34  
35  
36

### 37 **Other Factors Acting As Barriers to Exercise or Physical Activity**

38  
39 Throughout the discussion of physical activity and exercise, many other factors were  
40 acknowledged, though not directly in the context of exercise or physical activity. These topics  
41 related to life challenges that the participants faced, including drug abuse, feeling unsafe in their  
42 neighborhood, lack of affordable housing, mental health issues, or stigma related to HIV, sexual  
43 preference, or age. Every group had unprompted discussion about social isolation, or loss of  
44 friends or partners due to HIV or other reasons, “Now that I'm older, I don't have any 'gay  
45 friends' anymore. And I wonder, is it me? Or have they gone somewhere? I mean a lot of them  
46 died...But like, I don't have any gay friends. My friends are accepting of me even they know I  
47  
48  
49  
50  
51  
52  
53  
54  
55  
56  
57  
58  
59  
60

1  
2  
3 am, but I don't have any. Do you all have any friends who are HIV positive?" This limited group  
4  
5 of gay friends threatens the important social support motivator for exercise.  
6  
7

## 8 9 **Discussion:**

10  
11 As the SEM is frequently used to inform the personal and societal factors that influence  
12  
13 physical activity, we anticipated that our participants would identify the contribution of each level  
14  
15 to their own exercise and physical activity behaviors<sup>13 16 17</sup>. We instead found that participants  
16  
17 focused much more on the personal physical, mental, and social factors. While environment  
18  
19 came up as a deterrent for non-exercisers (negative gym culture), policy was seldom  
20  
21 recognized as an influence on physical activity. The lack of connection with the gay community  
22  
23 was also mentioned, but participants did not connect that to physical activity. Furthermore,  
24  
25 exercisers and non-exercisers recognized some similar, but also unique, barriers and facilitators  
26  
27 to routine exercise or physical activity that are important to consider when designing lifestyle  
28  
29 interventions for older PLWH.  
30  
31

32  
33 Physical health was identified as both a major barrier and a motivating factor to exercise.  
34  
35 The exercisers were more likely to mention the health-related benefits of exercise, report  
36  
37 increased energy, and acknowledge the importance of exercise towards improving overall  
38  
39 health, as has been reported previously in the general exercise literature<sup>17</sup>. Despite the  
40  
41 medical advances of HIV management with antiretroviral therapy, older PLWH appear to  
42  
43 experience age-associated comorbidities at a higher rate and at a younger age than the general  
44  
45 population<sup>2 26</sup>. The physical barriers attributed to HIV and medications, generalized fatigue, or  
46  
47 chronic pain by our participants are consistently identified as barriers to exercise among PLWH  
48  
49<sup>19 22-24</sup>. To engage older PLWH, exercise interventions must acknowledge and address these  
50  
51 physical barriers.  
52  
53

54  
55 All groups discussed the impact of depression and loss in their exercise behaviors (or  
56  
57 life) but the positive impact of exercise on mood and mental health was most often recognized  
58  
59

1  
2  
3 by the exercisers. These results are consistent with a recent meta-analysis that found aerobic  
4 and resistance exercise interventions had positive effects on various domains of mental health  
5 such as stress, anxiety and depressive symptoms in PLWH<sup>27</sup>. In contrast, mental health-related  
6 barriers to physical activity are well-described among other populations of PLWH<sup>19 23 24</sup>, and  
7 depression has been correlated with decreased PA levels in both PLWH and in the general  
8 population<sup>17 28</sup>. Depression as a barrier to exercise is of particular relevance given that PLWH  
9 have up to three times the rate of depression as the general population<sup>5</sup>. Among the  
10 exercisers, the mental health benefits of exercise were an important factor in the maintenance  
11 of physical activity and thus is an important domain to emphasize in future exercise intervention  
12 studies.

13  
14  
15  
16  
17  
18  
19  
20  
21  
22  
23  
24 One of the more striking differences between exercisers and non-exercisers was related  
25 to a lack of motivation and lack of self-efficacy for the non-exercisers. Self-efficacy has  
26 consistently been identified as one of strongest correlates with exercise behavior in adults in  
27 general<sup>16-18 29 30</sup> and PLWH<sup>28</sup>. Self-efficacy is commonly defined as an individual's confidence  
28 in their ability to complete a task or series of actions, in this case the ability to be able to  
29 exercise safely and effectively. Self-efficacy may interact with motivation to exercise, such that  
30 an individual with poor exercise self-efficacy has poor recognition of exercise benefits, less  
31 confidence in exercise ability, and therefore, less motivation to initiate exercise<sup>31</sup>. The non-  
32 exercising group identified a number of themes related to poor self-efficacy including changing  
33 technology in gyms, older age, and poor health. Similarly, non-exercisers identified  
34 interventions that may help overcome the lack of self-efficacy, including specific instruction and  
35 facilities catered to older adults.

36  
37  
38  
39  
40  
41  
42  
43  
44  
45  
46  
47  
48  
49 The social aspects of exercise or physical activity were strong motivators or benefits  
50 among both groups: Exercisers were more likely to mention encouragement from others as an  
51 important motivator, whereas non-exercisers focused on the general social environment, rather  
52 than the exercise-specific environment. Social isolation and a desire to connect with other social  
53  
54  
55  
56  
57  
58  
59  
60



1  
2  
3 groups were discussed by all participants, though not directly in the context of exercise. The  
4 importance of social support in exercise has been described among PLWH, whether as a  
5 “workout buddy”, general community activities, or more social support in general<sup>19 20 23 24</sup>. Older  
6 PLWH have high rates of social isolation, and may have challenges related to loss of friends  
7 due to illness, or estrangement from family due to HIV or other stigma<sup>6 32</sup>. Social support has  
8 been associated with greater physical activity, and loneliness with decreased physical activity<sup>33</sup>.  
9 Effective exercise and physical activity promotion and maintenance among older PLWH may  
10 require an augmented social environment.  
11  
12  
13  
14  
15  
16  
17  
18

19  
20 A unique finding was the negative perception of gym culture, recognized to the greatest  
21 extent among non-exercisers. The younger community at a gym was perceived as non-  
22 welcoming, and participants instead desired a genuine community that connected with them as  
23 individuals rather than as a depersonalized customer. There was little consensus among our  
24 focus groups regarding what an ideal exercise or physically active community would look like,  
25 particularly among the non-exercising group. In our previous work among older men with HIV  
26 enrolled in an exercise intervention, participants discussed the appeal of a gym community for  
27 older PLWH<sup>25</sup>. Here, however, we found this concept to be contentious, some citing a desire for  
28 connection with similar others (older and/or with HIV), but others relating a desire for privacy  
29 and concerns about disclosure due to HIV stigma, noted as a barrier to exercise in prior studies  
30 of PLWH<sup>20 22</sup>. Based on the data from these focus groups, the welcoming environment of a new  
31 gym or activity may be particularly important to those not currently exercising, and activities  
32 targeted for older adults may be beneficial. Aside from gym culture, the role of organizational,  
33 community, and policy factors (access, cost, indirect barriers such as insecure housing and  
34 affordable food, and the built environment) were discussed but not dominant. These commonly  
35 reported barriers to physical activity in the general population are a focus of public health and  
36 policy interventions<sup>15 17 18 34 35</sup>.  
37  
38  
39  
40  
41  
42  
43  
44  
45  
46  
47  
48  
49  
50  
51  
52  
53  
54  
55  
56  
57  
58  
59  
60

1  
2  
3 Our study has several limitations. The majority of our participants were white and  
4 college-educated men, limiting the generalizability of our findings. Themes that were mentioned  
5 by the women's group that merit further exploration include the importance of health-related  
6 barriers to exercise and placing higher value on an active lifestyle as opposed to structured  
7 exercise. Additionally, our participants were self-identified as exercisers or non-exercisers with  
8 no objective verification of their actual amount of type of physical activity. While many of the  
9 themes our participants discussed are supported by the literature, ideas about barriers due to  
10 gym culture and business models has not been reported to our knowledge, and our focus  
11 groups may not have been sufficient to provide saturation on these specific topics. When this  
12 data was reported to our community advisory group, they agreed that many corporate gyms had  
13 an unfriendly environment, but that perhaps smaller recreation centers might have more of a  
14 welcoming atmosphere that our participants desired.  
15  
16  
17  
18  
19  
20  
21  
22  
23  
24  
25  
26  
27  
28  
29

### 30 **Conclusions**

31  
32 In summary, inter- and intrapersonal factors, including an emphasis on social  
33 connection, were central to exercise behaviors among older adults with HIV whereas  
34 organizational, community, and policy level factors of the SEM were minor contributors. While  
35 addressing these higher-level SEM domains may be important for long-term and large-scale  
36 exercise and physical activity dissemination and maintenance, strategies to promote physical  
37 activity in older PLWH may need to focus on overcoming physical barriers and providing a safe  
38 and welcoming social environment.  
39  
40  
41  
42  
43  
44  
45  
46  
47  
48  
49  
50  
51  
52  
53  
54  
55  
56  
57  
58  
59  
60

**Funding Statement:**

Funding: This research was funded through the National Institutes of Health, National Institute on Aging (K23 AG050260 to KME) and NCATS Colorado CTSA (UL1 TR002535). Contents are the authors' sole responsibility and do not necessarily represent official NIH views.

**Data Statement section:**

Although the transcripts have been de-identified, to protect participant confidentiality regarding some conversations that occurred during the focus groups, the transcripts are readily available. Codebooks or sections of the transcripts can be requested by contacting the corresponding author.

**Author Contributions:**

NAJ, HN, and KME developed the initial codebook, with input from CJM. KME led the interview sessions with additional input from NAJ and CJM. Data coding was completed by Sara Dunham (see below), NAJ, and KME, with input from CJM, YKG, and HN if consensus was not achieved. NAJ prepared the first manuscript draft; all authors contributed to, reviewed, and approve of the final manuscript.

**Acknowledgements:**

Sarah Dunham, MPH also coded data.

**Competing Interests:**

KME has received funding for research paid to the University of Colorado from Gilead Sciences, and has received funding for advisory panel from Viiv Healthcare.

## References

1. Smit M, Brinkman K, Geerlings S, et al. Future challenges for clinical care of an ageing population infected with HIV: a modelling study. *The Lancet Infectious Diseases* 2015;15(7):810-18.
2. Deeks SG. HIV infection, inflammation, immunosenescence, and aging. *Annual review of medicine* 2011;62:141-55.
3. Castillo-Mancilla JR, Brown TT, Erlandson KM, et al. Suboptimal adherence to combination antiretroviral therapy is associated with higher levels of inflammation despite HIV suppression. *Clinical Infectious Diseases* 2016:ciw650.
4. Kaufman MR, Cornish F, Zimmerman RS, et al. Health Behavior Change Models for HIV Prevention and AIDS Care: Practical Recommendations for a Multi-Level Approach. *Journal of Acquired Immune Deficiency Syndromes (1999)* 2014;66(Suppl 3):S250-S58. doi: 10.1097/QAI.0000000000000236
5. Do AN, Rosenberg ES, Sullivan PS, et al. Excess burden of depression among HIV-infected persons receiving medical care in the United States: data from the medical monitoring project and the behavioral risk factor surveillance system. *PLoS One* 2014;9(3):e92842.
6. Emler CA. An examination of the social networks and social isolation in older and younger adults living with HIV/AIDS. *Health & social work* 2006;31(4):299-308.
7. Botros D, Somarriba G, Neri D, et al. Interventions to address chronic disease and HIV: strategies to promote exercise and nutrition among HIV-infected individuals. *Current HIV/AIDS Reports* 2012;9(4):351-63.
8. Jagers J, Hand G, Dudgeon W, et al. Aerobic and resistance training improves mood state among adults living with HIV. *International journal of sports medicine* 2015;36(02):175-81.
9. Neto MG, Conceição CS, Carvalho VO, et al. Effects of combined aerobic and resistance exercise on exercise capacity, muscle strength and quality of life in HIV-infected patients: a systematic review and meta-analysis. *PloS one* 2015;10(9):e0138066.
10. O'Brien KK, Tynan A-M, Nixon SA, et al. Effectiveness of aerobic exercise for adults living with HIV: systematic review and meta-analysis using the Cochrane Collaboration protocol. *BMC infectious diseases* 2016;16(1):182.
11. Fazeli PL, Marquine MJ, Dufour C, et al. Physical Activity is Associated with Better Neurocognitive and Everyday Functioning Among Older Adults with HIV Disease. *AIDS Behav* 2015;19(8):1470-7. doi: 10.1007/s10461-015-1024-z [published Online First: 2015/03/04]
12. Vancampfort D, Mugisha J, De Hert M, et al. Sedentary Behavior in People Living With HIV: A Systematic Review and Meta-Analysis. *Journal of physical activity & health* 2017;14(7):571-77. doi: 10.1123/jpah.2016-0507 [published Online First: 2017/03/16]
13. Sallis JF, Owen N, Fisher E. Ecological models of health behavior. *Health behavior: Theory, research, and practice* 2015;5:43-64.
14. McLeroy KR, Bibeau D, Steckler A, et al. An ecological perspective on health promotion programs. *Health education quarterly* 1988;15(4):351-77.
15. Macera CA, Cavanaugh A, Bellettiere J. State of the art review: Physical activity and older adults. *American Journal of Lifestyle Medicine* 2017;11(1):42-57.
16. Trost SG, Owen N, Bauman AE, et al. Correlates of adults' participation in physical activity: review and update. *Medicine & Science in Sports & Exercise* 2002;34(12):1996-2001.
17. Bauman AE, Reis RS, Sallis JF, et al. Correlates of physical activity: why are some people physically active and others not? *Lancet (London, England)* 2012;380(9838):258-71. doi: 10.1016/s0140-6736(12)60735-1 [published Online First: 2012/07/24]

18. Schutzer KA, Graves BS. Barriers and motivations to exercise in older adults. *Preventive medicine* 2004;39(5):1056-61.
19. Simonik A, Vader K, Ellis D, et al. Are you ready? Exploring readiness to engage in exercise among people living with HIV and multimorbidity in Toronto, Canada: a qualitative study. *BMJ open* 2016;6(3):e010029.
20. Ley C, Barrio MR, Leach L. Suppl 1: M6: social-ecological, motivational and volitional factors for initiating and maintaining physical activity in the context of HIV. *The open AIDS journal* 2015;9:96.
21. Webel AR, Perazzo JD, Dawson-Rose C, et al. A multinational qualitative investigation of the perspectives and drivers of exercise and dietary behaviors in people living with HIV. *Applied Nursing Research* 2017;37:13-18.
22. Nguyen AL, Lake JE, Reid MC, et al. Attitudes towards exercise among substance using older adults living with HIV and chronic pain. *AIDS care* 2017;29(9):1149-52. doi: 10.1080/09540121.2017.1325437
23. Roos R, Myezwa H, van Aswegen H. "Not easy at all but I am trying": barriers and facilitators to physical activity in a South African cohort of people living with HIV participating in a home-based pedometer walking programme. *AIDS care* 2015;27(2):235-39.
24. Montoya JL, Wing D, Knight A, et al. Development of an mHealth Intervention (iSTEP) to promote physical activity among people living with HIV. *Journal of the International Association of Providers of AIDS Care (JIAPAC)* 2015;14(6):471-75.
25. Neff HA, Kellar-Guenther Y, Jankowski CM, et al. Turning disability into ability: barriers and facilitators to initiating and maintaining exercise among older men living with HIV. *AIDS care* 2018:1-5.
26. Justice AC. HIV and aging: time for a new paradigm. *Current HIV/AIDS Reports* 2010;7(2):69-76.
27. Nosrat S, Whitworth JW, Ciccolo JT. Exercise and mental health of people living with HIV: A systematic review. *Chronic illness* 2017;13(4):299-319.
28. Vancampfort D, Mugisha J, Richards J, et al. Physical activity correlates in people living with HIV/AIDS: a systematic review of 45 studies. *Disability and Rehabilitation* 2018;40(14):1618-29. doi: 10.1080/09638288.2017.1306587
29. McAuley E, Szabo A, Gothe N, et al. Self-efficacy: implications for physical activity, function, and functional limitations in older adults. *American journal of lifestyle medicine* 2011;5(4):361-69.
30. Koeneman MA, Verheijden MW, Chinapaw MJM, et al. Determinants of physical activity and exercise in healthy older adults: A systematic review. *International Journal of Behavioral Nutrition and Physical Activity* 2011;8(1):142. doi: 10.1186/1479-5868-8-142
31. Gray L, Chalabaev A, Durant J, et al. Exercise stereotypes and fatigue in people living with HIV: does self-efficacy play a mediating or a moderating role? *Archives of Public Health* 2018;76(1):23.
32. Schrimshaw EW, Siegel K. Perceived barriers to social support from family and friends among older adults with HIV/AIDS. *Journal of Health Psychology* 2003;8(6):738-52.
33. Smith GL, Banting L, Eime R, et al. The association between social support and physical activity in older adults: a systematic review. *International Journal of Behavioral Nutrition and Physical Activity* 2017;14(1):56.
34. Prince SA, Reed JL, McFetridge C, et al. Correlates of sedentary behaviour in adults: a systematic review. *Obesity reviews : an official journal of the International Association for the Study of Obesity* 2017;18(8):915-35. doi: 10.1111/obr.12529 [published Online First: 2017/05/20]

- 1  
2  
3 35. Thornton CM, Kerr J, Conway TL, et al. Physical Activity in Older Adults: an Ecological  
4 Approach. *Annals of Behavioral Medicine* 2017;51(2):159-69. doi: 10.1007/s12160-016-  
5 9837-1  
6  
7  
8  
9  
10  
11  
12  
13  
14  
15  
16  
17  
18  
19  
20  
21  
22  
23  
24  
25  
26  
27  
28  
29  
30  
31  
32  
33  
34  
35  
36  
37  
38  
39  
40  
41  
42  
43  
44  
45  
46  
47  
48  
49  
50  
51  
52  
53  
54  
55  
56  
57  
58  
59  
60

For peer review only

Table 1. Participant Characteristics

|                              | Non-exercising Men (n=14) | Exercising Men (n=11) | Women (Non-exercises and exercisers, n=4) |
|------------------------------|---------------------------|-----------------------|-------------------------------------------|
| Age                          | 58 (53, 65)               | 57 (53, 61)           | 56 (53,61)                                |
| Race                         |                           |                       |                                           |
| White                        | 8 (57)                    | 10 (91)               | 2 (50)                                    |
| Black                        | 3 (21)                    | 1(9)                  | 1 (25)                                    |
| Other                        | 3 (21)                    | 0 (0)                 | 1 (25)                                    |
| Ethnicity                    |                           |                       |                                           |
| Hispanic or Latino           | 2 (14)                    | 1 (9)                 | 1 (25)                                    |
| Not Hispanic / Unknown       | 12 (86)                   | 10 (91)               | 3 (75)                                    |
| Education                    |                           |                       |                                           |
| Some high school             | 0 (0)                     | 0 (0)                 | 1 (25)                                    |
| High school or equivalent    | 2 (14)                    | 4 (36)                | 0 (0)                                     |
| Some college                 | 5 (36)                    | 3 (27)                | 3 (75)                                    |
| College degree               | 2 (14)                    | 3 (27)                | 0 (0)                                     |
| Post-graduate work           | 5 (36)                    | 1 (9)                 | 0 (0)                                     |
| Employment                   |                           |                       |                                           |
| On disability                | 4 (29)                    | 6 (55)                | 0 (0)                                     |
| Unemployed                   | 5 (36)                    | 0 (0)                 | 3 (75)                                    |
| Retired                      | 4 (29)                    | 3 (27)                | 0 (0)                                     |
| Full-time                    | 2 (14)                    | 2 (18)                | 0 (0)                                     |
| Part-time                    | 0 (0)                     | 0 (0)                 | 1 (25)                                    |
| Years since HIV diagnosis    | 20 (11, 27)               | 20 (14, 27)           | 15 (4,27)                                 |
| Sexual Preference            |                           |                       |                                           |
| Men                          | 13 (93)                   | 8 (73)                | 4 (100)                                   |
| Women                        | 1 (7)                     | 2 (18)                | 0 (0)                                     |
| Other                        | 0 (0)                     | 1 (9)                 | 0 (0)                                     |
| Self-Reported Co-morbidities |                           |                       |                                           |
| Hypertension                 | 4 (29)                    | 4 (29)                | 2 (50)                                    |
| Hyperlipidemia               | 2 (14)                    | 4 (29)                | 0 (0)                                     |
| Diabetes                     | 2 (14)                    | 0 (0)                 | 0 (0)                                     |
| Depression / anxiety         | 9 (64)                    | 7 (64)                | 3 (75)                                    |
| Osteoporosis                 | 1 (7)                     | 0 (0)                 | 0 (0)                                     |

Presented as median with interquartile range (IQR) or frequency (%).

Table 2. Themes, sub-themes, and frequency of times mentioned across focus groups.

| Main Theme                                 | Sub-theme                    | Example                                                                                                                                                                                                                                                                                                                                                                                                                                                                                           | Count of Times Discussed in Each Group |                           |       |
|--------------------------------------------|------------------------------|---------------------------------------------------------------------------------------------------------------------------------------------------------------------------------------------------------------------------------------------------------------------------------------------------------------------------------------------------------------------------------------------------------------------------------------------------------------------------------------------------|----------------------------------------|---------------------------|-------|
|                                            |                              |                                                                                                                                                                                                                                                                                                                                                                                                                                                                                                   | Exercisers (men only)                  | Non-exercisers (men only) | Women |
| <b>Motivators and benefits to exercise</b> |                              |                                                                                                                                                                                                                                                                                                                                                                                                                                                                                                   |                                        |                           |       |
| Intrapersonal                              | Sense of accomplishment      | <p>“For me, yeah. It’s a badge of something. It is an achievement”</p> <p>“and I was so proud of myself cause that was the first time that I’d danced in so long”</p> <p>“And I’ll set, for instance on my stationary bike how far I’m going to go. And try to achieve that. And I really feel good when I achieve that goal. And probably move it up a little bit the next time”</p>                                                                                                             | 10                                     | 5                         | 0     |
|                                            | Health-related motivators    | <p>“But I guess one of my goals is that I am self-sufficient and able to live in my own home. We own our own home. I want to be able to stay in my own home. That’s important to me”</p> <p>“So it is like yeah, I’ve got to exercise. Keep eating, but keep exercising so I don’t blow up like a balloon. Because if I do, I’m not going to walk again”</p> <p>“If you want to live longer, you have to get a trainer and join a gym. He said lean muscle mass and organ tissue is the key.”</p> | 23                                     | 6                         | 12    |
|                                            | Positive mood change         | <p>“For me it is a lot of a reliever of stress. It gives you that freedom in your head. You feel much better, you know?”</p> <p>“And my partner many years ago suggested and encouraged me to find some kind of exercise that I enjoyed. And it was that encouragement that I discovered the pool. And I went over there and to this day, I believe that for some reason, just simply being in the water is like a safe zone for depression.”</p>                                                 | 22                                     | 11                        | 3     |
|                                            | Increased energy             | <p>“And by exercising, I find I get a lot more energy than if I’m just sitting around like a couch potato, not doing anything. So...I try to make it a regular part of my life”</p> <p>“I just have lived through a variety of things I could do to improve my vitality and I’ve found that exercise is the most energizing.”</p>                                                                                                                                                                 | 13                                     | 3                         | 4     |
|                                            | Thinking is clearer          | <p>“[when asked to describe how he feels when exercising] Focused and present. Mindful and serene.”</p>                                                                                                                                                                                                                                                                                                                                                                                           | 9                                      | 15                        | 2     |
| Interpersonal                              | Social activities outside of | <p>“I’ve found that if you have a lot of people who are more active, you tend to be more active.”</p>                                                                                                                                                                                                                                                                                                                                                                                             | 12                                     | 18                        | 7     |



1  
2  
3  
4  
5  
6  
7  
8  
9  
10  
11  
12  
13  
14  
15  
16  
17  
18  
19  
20  
21  
22  
23  
24  
25  
26  
27  
28  
29  
30  
31  
32  
33  
34  
35  
36  
37  
38  
39  
40  
41  
42  
43  
44  
45  
46  
47

|                             |                                                                                               |                                                                                                                                                                                                                                                                                                                                                                                                                                                                                                                                                                                                                                                                                                                                                                                                                                                              |    |    |    |
|-----------------------------|-----------------------------------------------------------------------------------------------|--------------------------------------------------------------------------------------------------------------------------------------------------------------------------------------------------------------------------------------------------------------------------------------------------------------------------------------------------------------------------------------------------------------------------------------------------------------------------------------------------------------------------------------------------------------------------------------------------------------------------------------------------------------------------------------------------------------------------------------------------------------------------------------------------------------------------------------------------------------|----|----|----|
|                             | exercise                                                                                      | <p>"I think the community part of it connects me. So I want to go [to the gym] at the same time cause I know the same people are going to be there. It gets me on that schedule."</p> <p>"And for many years, what got me over to the pool was knowing I would see people that I enjoyed being with. And then I would spend the first hour socializing and you know, we had a routine where we'd visit for quite a while"</p>                                                                                                                                                                                                                                                                                                                                                                                                                                |    |    |    |
| <b>Barriers to exercise</b> |                                                                                               |                                                                                                                                                                                                                                                                                                                                                                                                                                                                                                                                                                                                                                                                                                                                                                                                                                                              |    |    |    |
| Intrapersonal               | Physical health (medication side effects, fatigue, disability, other health responsibilities) | <p>"Well, it's funny that you mention the chemo and stuff, because after I got done with the Interferon for the Hep C treatment, I noticed my energy level was zapped. And even to this day, I'm not back to where I was 7 1/2 years ago, prior to starting that, you know?"</p> <p>"And then I got really sick and I had a lot of problems with my legs and I wasn't really able to walk. And then I had to battle that, even though it was a missed diagnosis. I had a PIC line for 6 months, so I didn't work out for that period either. And so there were medical reasons and drug reasons why I didn't work out."</p> <p>"Well, you know...I'm not very active. I have a spinal thing going on. And...they are probably going to have to operate on. So I've been kind of out of the exercise program...I was in the hospital for about 9 months."</p> | 20 | 36 | 20 |
|                             | Lack of motivation or self-efficacy                                                           | <p>"I mean...trying to get motivated at an older age is difficult cause you do have to be motivated and you do have to be focused. But...it is just not there really..."</p> <p>"So I could go back into something that I feel like I'm comfortable in. But the motivation to believe in myself and to have the ability to know that I can do it again, would probably be the hardest part for me."</p>                                                                                                                                                                                                                                                                                                                                                                                                                                                      | 3  | 21 | 8  |
|                             | Age-related barriers                                                                          | <p>"I think one of the biggest problems with gyms today, they are activities. And there are a lot of them that are ...their focus is younger people. They don't have age related...they don't cater to, you know, the broader demographics of society"</p> <p>"That's why I don't play any hockey because it would take me a week to recuperate. When you are younger, it takes a couple hours and you are good to go."</p>                                                                                                                                                                                                                                                                                                                                                                                                                                  | 3  | 17 | 9  |
| Interpersonal               | Social factors (caregiver burden, lack of social group, lack of support                       | <p>"But I'm finding myself more and more and more just staying in the apartment for a number of reasons. Number one, I don't have anybody to do anything with."</p> <p>"Yeah. I have a problem with accountability. Doing it by myself is hard to do."</p>                                                                                                                                                                                                                                                                                                                                                                                                                                                                                                                                                                                                   | 9  | 3  | 10 |

|                               |                                                                                  |                                                                                                                                                                                                                                                                                                                                                                                                                                                                                                                                                |    |    |    |
|-------------------------------|----------------------------------------------------------------------------------|------------------------------------------------------------------------------------------------------------------------------------------------------------------------------------------------------------------------------------------------------------------------------------------------------------------------------------------------------------------------------------------------------------------------------------------------------------------------------------------------------------------------------------------------|----|----|----|
|                               | from family and friends)                                                         |                                                                                                                                                                                                                                                                                                                                                                                                                                                                                                                                                |    |    |    |
| Environmental                 | Comfort at the gym                                                               | <p>"I don't want to get naked at the gym anymore and I like getting naked to use the facility. I mean you know, you take a shower and you take a steam. But I just don't want to do it anymore."</p> <p>"But I got so embarrassed because there were probably mostly women. Elderly. And they would hand the pin at #10 to be able to do each machine. And I couldn't do 10. So I would ...So I would sit down and watch the women. And they would see...I got so embarrassed...so I would deliberately put it back to 10 and I was done."</p> | 2  | 10 | 5  |
|                               | Gym culture                                                                      | "I always assume I am going to be sold. Like there is going to be a sales person there at the gym of some sort, that is going to sell me on some package or something... They aren't really concerned about my needs but what they can get out of me."                                                                                                                                                                                                                                                                                         | 3  | 23 | 1  |
| <b>Ideal gym / next steps</b> |                                                                                  |                                                                                                                                                                                                                                                                                                                                                                                                                                                                                                                                                |    |    |    |
| Facility level factors        | Cost                                                                             | <p>"Back when I used to go to the gym, to the public gym, the charges were like 5.00 a year or something...but man, it is hundreds of dollars now."</p> <p>"Again, feel the same. I look at exercise...going to a gym. I wouldn't mind going to a gym...if I could afford it."</p>                                                                                                                                                                                                                                                             | 11 | 14 | 5  |
|                               | Amenities (age appropriate and varied activities, instructions, good facilities) | <p>"So maybe have like the ones that cater to the 20 to 30, maybe 30 to 40 and someone that caters to the 40 to 40 plus year olds?"</p> <p>"I'd much rather not ask questions about something. Like if the machine had a basic sign that it is used for this. And best to be used after this...kind of a 5 point user's manual."</p> <p>"I like a clean gym where things are working, you know? Where parking is easy."</p>                                                                                                                    | 3  | 11 | 2  |
| Social factors                | Who is at the gym                                                                | <p>"I just want to be by myself at the gym...I mean if they had a gym for HIV, I still wouldn't go because why advertise it?"</p> <p>"...having people around you that are of a similar age...you don't feel...I don't know if it's threatened or whatever, but you just feel more at ease. You know?"</p> <p>"I need a place where I can talk about HIV"</p>                                                                                                                                                                                  | 12 | 21 | 3  |
|                               | Interpersonal interactions                                                       | <p>"Yeah. Yeah. Again, the gym is not going to miss you, if you don't show up. But if you've got a buddy, he might give you a call and go where the hell are you?"</p> <p>"And I think that there is a social aspect to it. I don't like competition with other people. But I like being around other people and sharing the same kind of things that they do."</p>                                                                                                                                                                            | 40 | 25 | 11 |

1  
2  
3  
4  
5  
6  
7  
8  
9  
10  
11  
12  
13  
14  
15  
16  
17  
18  
19  
20  
21  
22  
23  
24  
25  
26  
27  
28  
29  
30  
31  
32  
33  
34  
35  
36  
37  
38  
39  
40  
41  
42  
43  
44  
45  
46  
47

|  |  |                                                                                                                                          |  |  |  |
|--|--|------------------------------------------------------------------------------------------------------------------------------------------|--|--|--|
|  |  | <p>“Yeah. A little check in with people. How are you doing? How's your work out? And just whatever conversation it is. I like that.”</p> |  |  |  |
|--|--|------------------------------------------------------------------------------------------------------------------------------------------|--|--|--|

For peer review only

# Reporting checklist for qualitative study.

Based on the SRQR guidelines.

## Instructions to authors

Complete this checklist by entering the page numbers from your manuscript where readers will find each of the items listed below.

Your article may not currently address all the items on the checklist. Please modify your text to include the missing information. If you are certain that an item does not apply, please write "n/a" and provide a short explanation.

Upload your completed checklist as an extra file when you submit to a journal.

In your methods section, say that you used the SRQR reporting guidelines, and cite them as:

O'Brien BC, Harris IB, Beckman TJ, Reed DA, Cook DA. Standards for reporting qualitative research: a synthesis of recommendations. *Acad Med.* 2014;89(9):1245-1251.

|                                            | Reporting Item                                                                                                                                                                                                                                          | Page Number |
|--------------------------------------------|---------------------------------------------------------------------------------------------------------------------------------------------------------------------------------------------------------------------------------------------------------|-------------|
|                                            | <a href="#">#1</a> Concise description of the nature and topic of the study identifying the study as qualitative or indicating the approach (e.g. ethnography, grounded theory) or data collection methods (e.g. interview, focus group) is recommended | 5-7         |
|                                            | <a href="#">#2</a> Summary of the key elements of the study using the abstract format of the intended publication; typically includes background, purpose, methods, results and conclusions                                                             | 3-4         |
| Problem formulation                        | <a href="#">#3</a> Description and significance of the problem / phenomenon studied: review of relevant theory and empirical work; problem statement                                                                                                    | 5-6         |
| Purpose or research question               | <a href="#">#4</a> Purpose of the study and specific objectives or questions                                                                                                                                                                            | 6           |
| Qualitative approach and research paradigm | <a href="#">#5</a> Qualitative approach (e.g. ethnography, grounded theory, case study, phenomenology, narrative research) and                                                                                                                          | 7           |

guiding theory if appropriate; identifying the research paradigm (e.g. postpositivist, constructivist / interpretivist) is also recommended; rationale. The rationale should briefly discuss the justification for choosing that theory, approach, method or technique rather than other options available; the assumptions and limitations implicit in those choices and how those choices influence study conclusions and transferability. As appropriate the rationale for several items might be discussed together.

|    |                           |                     |                                                              |          |
|----|---------------------------|---------------------|--------------------------------------------------------------|----------|
| 1  |                           |                     |                                                              |          |
| 2  |                           |                     |                                                              |          |
| 3  |                           |                     |                                                              |          |
| 4  |                           |                     |                                                              |          |
| 5  |                           |                     |                                                              |          |
| 6  |                           |                     |                                                              |          |
| 7  |                           |                     |                                                              |          |
| 8  |                           |                     |                                                              |          |
| 9  |                           |                     |                                                              |          |
| 10 |                           |                     |                                                              |          |
| 11 |                           |                     |                                                              |          |
| 12 |                           |                     |                                                              |          |
| 13 |                           |                     |                                                              |          |
| 14 | Researcher                | <a href="#">#6</a>  | Researchers' characteristics that may influence the          | 6        |
| 15 | characteristics and       |                     | research, including personal attributes, qualifications /    |          |
| 16 | reflexivity               |                     | experience, relationship with participants, assumptions      |          |
| 17 |                           |                     | and / or presuppositions; potential or actual interaction    |          |
| 18 |                           |                     | between researchers' characteristics and the research        |          |
| 19 |                           |                     | questions, approach, methods, results and / or               |          |
| 20 |                           |                     | transferability                                              |          |
| 21 |                           |                     |                                                              |          |
| 22 |                           |                     |                                                              |          |
| 23 |                           |                     |                                                              |          |
| 24 |                           |                     |                                                              |          |
| 25 | Context                   | <a href="#">#7</a>  | Setting / site and salient contextual factors; rationale     |          |
| 26 |                           |                     |                                                              |          |
| 27 |                           |                     |                                                              |          |
| 28 | Sampling strategy         | <a href="#">#8</a>  | How and why research participants, documents, or             | 6        |
| 29 |                           |                     | events were selected; criteria for deciding when no          |          |
| 30 |                           |                     | further sampling was necessary (e.g. sampling                |          |
| 31 |                           |                     | saturation); rationale                                       |          |
| 32 |                           |                     |                                                              |          |
| 33 |                           |                     |                                                              |          |
| 34 |                           |                     |                                                              |          |
| 35 | Ethical issues pertaining | <a href="#">#9</a>  | Documentation of approval by an appropriate ethics           | 6        |
| 36 | to human subjects         |                     | review board and participant consent, or explanation for     |          |
| 37 |                           |                     | lack thereof; other confidentiality and data security issues |          |
| 38 |                           |                     |                                                              |          |
| 39 |                           |                     |                                                              |          |
| 40 | Data collection methods   | <a href="#">#10</a> | Types of data collected; details of data collection          | 6        |
| 41 |                           |                     | procedures including (as appropriate) start and stop         |          |
| 42 |                           |                     | dates of data collection and analysis, iterative process,    |          |
| 43 |                           |                     | triangulation of sources / methods, and modification of      |          |
| 44 |                           |                     | procedures in response to evolving study findings;           |          |
| 45 |                           |                     | rationale                                                    |          |
| 46 |                           |                     |                                                              |          |
| 47 |                           |                     |                                                              |          |
| 48 |                           |                     |                                                              |          |
| 49 |                           |                     |                                                              |          |
| 50 | Data collection           | <a href="#">#11</a> | Description of instruments (e.g. interview guides,           | 6-7      |
| 51 | instruments and           |                     | questionnaires) and devices (e.g. audio recorders) used      |          |
| 52 | technologies              |                     | for data collection; if / how the instruments(s) changed     |          |
| 53 |                           |                     | over the course of the study                                 |          |
| 54 |                           |                     |                                                              |          |
| 55 |                           |                     |                                                              |          |
| 56 |                           |                     |                                                              |          |
| 57 | Units of study            | <a href="#">#12</a> | Number and relevant characteristics of participants,         | 8, table |
| 58 |                           |                     | documents, or events included in the study; level of         | 1        |
| 59 |                           |                     |                                                              |          |
| 60 |                           |                     |                                                              |          |

participation (could be reported in results)

|                                                    |                                                                                              |                     |                                                                                                                                                                                                                                                                                                          |      |
|----------------------------------------------------|----------------------------------------------------------------------------------------------|---------------------|----------------------------------------------------------------------------------------------------------------------------------------------------------------------------------------------------------------------------------------------------------------------------------------------------------|------|
| 1<br>2<br>3<br>4<br>5<br>6<br>7<br>8               | Data processing                                                                              | <a href="#">#13</a> | Methods for processing data prior to and during analysis, including transcription, data entry, data management and security, verification of data integrity, data coding, and anonymisation / deidentification of excerpts                                                                               | 6-7  |
| 9<br>10<br>11<br>12<br>13<br>14<br>15              | Data analysis                                                                                | <a href="#">#14</a> | Process by which inferences, themes, etc. were identified and developed, including the researchers involved in data analysis; usually references a specific paradigm or approach; rationale                                                                                                              | 6-7  |
| 16<br>17<br>18<br>19<br>20                         | Techniques to enhance trustworthiness                                                        | <a href="#">#15</a> | Techniques to enhance trustworthiness and credibility of data analysis (e.g. member checking, audit trail, triangulation); rationale                                                                                                                                                                     | 7    |
| 21<br>22<br>23<br>24<br>25<br>26                   | Syntheses and interpretation                                                                 | <a href="#">#16</a> | Main findings (e.g. interpretations, inferences, and themes); might include development of a theory or model, or integration with prior research or theory                                                                                                                                               | 8-12 |
| 27<br>28<br>29<br>30                               | Links to empirical data                                                                      | <a href="#">#17</a> | Evidence (e.g. quotes, field notes, text excerpts, photographs) to substantiate analytic findings                                                                                                                                                                                                        | 8-12 |
| 31<br>32<br>33<br>34<br>35<br>36<br>37<br>38<br>39 | Intergration with prior work, implications, transferability and contribution(s) to the field | <a href="#">#18</a> | Short summary of main findings; explanation of how findings and conclusions connect to, support, elaborate on, or challenge conclusions of earlier scholarship; discussion of scope of application / generalizability; identification of unique contributions(s) to scholarship in a discipline or field | 13   |
| 40<br>41<br>42                                     | Limitations                                                                                  | <a href="#">#19</a> | Trustworthiness and limitations of findings                                                                                                                                                                                                                                                              | 16   |
| 43<br>44<br>45<br>46<br>47                         | Conflicts of interest                                                                        | <a href="#">#20</a> | Potential sources of influence of perceived influence on study conduct and conclusions; how these were managed                                                                                                                                                                                           | 7    |
| 48<br>49<br>50<br>51                               | Funding                                                                                      | <a href="#">#21</a> | Sources of funding and other support; role of funders in data collection, interpretation and reporting                                                                                                                                                                                                   | 17   |

The SRQR checklist is distributed with permission of Wolters Kluwer © 2014 by the Association of American Medical Colleges. This checklist can be completed online using <https://www.goodreports.org/>, a tool made by the [EQUATOR Network](#) in collaboration with [Penelope.ai](#)

# BMJ Open

## Perceived Barriers and Benefits to Exercise by Self-Described Exercise Status, among Older Adults Living with HIV

|                                 |                                                                                                                                                                                                                                                                                                                                                                                                    |
|---------------------------------|----------------------------------------------------------------------------------------------------------------------------------------------------------------------------------------------------------------------------------------------------------------------------------------------------------------------------------------------------------------------------------------------------|
| Journal:                        | <i>BMJ Open</i>                                                                                                                                                                                                                                                                                                                                                                                    |
| Manuscript ID                   | bmjopen-2018-026294.R1                                                                                                                                                                                                                                                                                                                                                                             |
| Article Type:                   | Research                                                                                                                                                                                                                                                                                                                                                                                           |
| Date Submitted by the Author:   | 10-Dec-2018                                                                                                                                                                                                                                                                                                                                                                                        |
| Complete List of Authors:       | Johs, Nikolas; University of Colorado, School of Medicine<br>Kellar-Guenther, Yvonne; Center for Public Health Innovation, CI<br>International; University of Colorado, School of Public Health<br>Jankowski , Catherine M. ; University of Colorado, College of Nursing<br>Neff, Hadlai; University of Colorado, School of Public Health<br>Erlandson, Kristine; University of Colorado, Medicine |
| <b>Primary Subject Heading</b>: | HIV/AIDS                                                                                                                                                                                                                                                                                                                                                                                           |
| Secondary Subject Heading:      | Public health, Qualitative research, Sports and exercise medicine                                                                                                                                                                                                                                                                                                                                  |
| Keywords:                       | HIV & AIDS < INFECTIOUS DISEASES, GERIATRIC MEDICINE, PUBLIC HEALTH                                                                                                                                                                                                                                                                                                                                |
|                                 |                                                                                                                                                                                                                                                                                                                                                                                                    |

SCHOLARONE™  
Manuscripts

1  
2  
3 **Perceived Barriers and Benefits to Exercise by Self-Described Exercise Status, among**  
4  
5 **Older Adults Living with HIV**  
6  
7

8  
9 Nikolas A. Johs<sup>1</sup>, Yvonne Kellar-Guenther<sup>2,3</sup>, Catherine M. Jankowski<sup>4</sup>, Hadlai Neff<sup>3</sup>, Kristine M.  
10  
11 Erlandson<sup>5</sup>  
12

- 13  
14 1. University of Colorado-Anschutz Medical Campus, School of Medicine, Aurora, CO  
15 2. Center for Public Health Innovation, CI International, Littleton, CO  
16 3. University of Colorado-Anschutz Medical Campus, School of Public Health, Aurora, CO  
17 4. University of Colorado-Anschutz Medical Campus, College of Nursing, Aurora, CO  
18 5. University of Colorado-Anschutz Medical Campus, Department of Medicine, Divisions of  
19 Infectious Diseases and Geriatric Medicine, Aurora, CO  
20

21 *Corresponding Author:*

22  
23 Kristine M. Erlandson, MD MS

24  
25 12700 E 19<sup>th</sup> Ave; Mail Stop B168

26  
27 Aurora, CO 80045

28  
29 (p) 303-724-4941; (f) 303-724-4926

30  
31 [Kristine.Erlandson@ucdenver.edu](mailto:Kristine.Erlandson@ucdenver.edu)  
32  
33

34 Word Count:

35 Abstract 286

36  
37 Manuscript 3990  
38

39 Running Head: Barriers and Benefits to Exercise in HIV

40  
41 Key word: physical activity, exercise, aging, HIV, qualitative  
42  
43  
44  
45  
46  
47  
48  
49  
50  
51  
52  
53  
54  
55  
56  
57  
58  
59  
60



## Abstract

**Objectives:** Although exercise interventions have been shown to improve health outcomes among older people with HIV (PLWH), this population remains highly sedentary. The purpose of this study was to examine the differences in perceived barriers and benefits to exercise among older PLWH by self-identified exercise status.

**Design:** Five focus groups were conducted among PLWH: two groups of exercising men, two groups of non-exercising men, and one group of women (mixed exercisers and non-exercisers). Themes were analyzed in relation to the social ecological model (SEM), utilizing the constant comparative approach.

**Setting:** Patients were recruited from an academic medical center HIV clinic and community locations.

**Participants:** PLWH aged 50 or older, diagnosed with HIV for at least two years, with no other health conditions that would preclude exercise.

**Primary and Secondary Outcome Measures:** Determine facilitators, barriers, and ideal environment for exercise or physical activity and whether these differ between older PLWH who self-identify as an exerciser or non-exerciser.

**Results:** Among 25 men (11 exercisers and 14 non-exercisers) and 4 women (3 non-exercisers and 1 exerciser), non-exercisers mentioned fewer benefits to exercise (n=46) than exercisers (n=75). Exercisers emphasized positive reinforcement, positive mood change and increased energy as benefits of exercise; interpersonal benefits of exercise were also discussed twice as often for exercisers than non-exercisers. Non-exercisers emphasized barriers to exercise including lack of motivation, lack of self-efficacy, and a negative perception of gym culture. Non-exercisers identified a need for age-appropriate activities as a feature of an ideal exercise

1  
2  
3 environment. Both groups identified time, cost, and health-related challenges as barriers to  
4  
5 exercise.  
6  
7

8 **Conclusions:** Unique exercise barriers and benefits by self-identified exercise status provide  
9  
10 important insights into the design of future interventions to initiate and maintain exercise.  
11  
12  
13  
14  
15  
16  
17  
18  
19  
20  
21  
22  
23  
24  
25  
26  
27  
28  
29  
30  
31  
32  
33  
34  
35  
36  
37  
38  
39  
40  
41  
42  
43  
44  
45  
46  
47  
48  
49  
50  
51  
52  
53  
54  
55  
56  
57  
58  
59  
60

## Article Summary

### Strengths and Limitations of This Study:

- We explored the perspectives of older men living with HIV on exercise among those with and without established exercise habits, which has not previously been reported in the literature
- This qualitative codebook was created in two phases. First transcripts were read and coders created an initial coding scheme based on the patterns seen on first pass-through. Additional codes were then developed from prior focus groups in this population as well as themes from the literature and added prior to analysis.
- All coding was done by hand by individual investigators, and all codes were reviewed by a third team member until a group consensus was reached
- Results of the analysis were shared with members of the community advisory board for further validation of the data
- Due to difficulty in recruiting women, data saturation of themes was not reached in this group and was only peripherally used to inform interpretation of the data

## Introduction:

With the advent of highly active antiretroviral therapy, nearly half of people living with HIV (PLWH) now are over 50 years old, and this number is expected to increase to 70% by 2030<sup>1</sup>. Higher rates of age-associated comorbidities among older PLWH, such as cardiovascular disease, osteoporosis, and neurocognitive disorders<sup>2</sup>, are likely due in part to chronic inflammation, seen with even suppressed HIV<sup>3</sup>. Furthermore, older adults with HIV often face higher rates of depression, social isolation, and the impact of both age-related and HIV-related stigma, which contribute to health disparities<sup>4-6</sup>. Exercise or physical activity appears to be a safe and effective way to prevent negative health outcomes associated with comorbidities in older PLWH<sup>7-14</sup>. Exercise interventions have been shown to improve cardiovascular fitness, bone mineral density, body composition, functional status, neurocognitive function, and health-related quality of life in PLWH,<sup>15-18</sup> and exercise is recommended for older PLWH<sup>19</sup>. Despite the importance of physical activity and exercise to health among older PLWH, high rates of sedentary behavior are common<sup>20 21</sup>.

The factors that drive health behaviors in a population are often described through the social ecological model (SEM). The SEM posits that health behavior is influenced by a number of personal, social, organizational, community, and policy level factors that interact, and cannot be fully understood or enacted upon without addressing all potential levels of influence<sup>22 23</sup>. Indeed, the SEM model has been used extensively in the exercise health behavior literature to investigate the many competing factors that influence physical activity<sup>24-27</sup>. Similarly, a number of qualitative studies have explored attitudes towards exercise or physical activity among diverse populations of PLWH and have identified factors influencing exercise or routine physical activity, such as physical health and self-efficacy (personal), social support and competing priorities such as caregiver responsibilities (social), and accessibility of safe environments for exercise (community)<sup>28-33</sup>. However, these studies did not distinguish the viewpoints of participants with, and without, established exercise habits. Thus, the focus of this qualitative

1  
2  
3 study was to explore whether the facilitators, barriers, and ideal environment for exercise or  
4 physical activity differ between older PLWH who self-identify as an exerciser compared to a  
5 non-exerciser, with the hypothesis that many factors directly influencing exercise behavior  
6 would span the SEM levels. Identification of the key differences influencing behavior between  
7 PLWH who do and do not exercise will inform multi-level interventions to most effectively  
8 transition non-exercisers into self-identified exercisers.  
9  
10  
11  
12  
13  
14  
15  
16  
17

### 18 **Methods:**

19  
20 Participants were recruited from a University-based HIV primary care clinic and from local HIV  
21 community groups. Eligible participants were diagnosed with HIV for  $\geq 2$  years, aged  $\geq 50$  years,  
22 regularly seeing a physician for HIV care, taking antiretroviral therapy for  $\geq 6$  months, and did  
23 not have a major disability (e.g., non-ambulatory) that would preclude exercise. Participants  
24 self-identified exercise behavior in response to the question, “are you currently exercising  
25 regularly, meaning more than 2 days per week, on most weeks?”. All participants provided  
26 written informed consent. The study was approved by the Colorado Multi-Institutional Review  
27 Board and was registered on Clinical Trials.gov (NCT02404792).  
28  
29  
30  
31  
32  
33  
34  
35  
36

37 Five focus groups were conducted in June 2016 including: two groups of men that self-  
38 identified as exercisers; two groups of men that self-identified as non-exercisers; and a group of  
39 women (both exercisers and non-exercisers, n=4). The focus groups took place in a private  
40 conference room in an outpatient medical facility located near the clinic where the majority of  
41 participants obtained care. All five focus groups were conducted by a physician who works in  
42 the HIV primary care clinic (KME); four of the participants were patients of the physician  
43 conducting the focus group. Notes were taken by a second investigator with no treatment  
44 relationship to the participants (NAJ). Participants completed a short demographic survey prior  
45 to the focus group session. Each session lasted approximately two hours. A semi-structured  
46 guide of open-ended questions informed by the literature and prior work by our group<sup>34</sup> was  
47  
48  
49  
50  
51  
52  
53  
54  
55  
56  
57  
58  
59  
60

1  
2  
3 used to facilitate the discussion. All focus groups were audio-recorded and transcribed verbatim  
4  
5 by a transcriptionist not involved in the study. Participants were provided with a \$20 gift card  
6  
7 after completion of the focus group.  
8

9  
10 The transcripts were analyzed individually by two members of the study team involved in  
11  
12 the focus groups, and another team member who was not involved. First, rather than starting  
13  
14 with a theory like SEM, the team created a codebook in two phases. First transcripts were read  
15  
16 and coders created an initial coding scheme based on the patterns seen on first pass-through.  
17  
18 Codes were then added using a deductive approach with a list of key domains developed from a  
19  
20 prior set of focus groups (in PLWH), as well as prior literature for exercise barriers in older  
21  
22 adults and PLWH<sup>34</sup>. New codes identified during the analysis were added to the coding scheme  
23  
24 and, utilizing a constant-comparison approach, the early transcripts were reanalyzed after the  
25  
26 final codebook was determined.  
27

28  
29 Coding and analyses were completed by hand, independently by each investigator, and  
30  
31 then codes were compared; differences were resolved by group consensus. Categories were  
32  
33 structured by benefits and motivators to exercise, barriers to exercise, ideal conditions for  
34  
35 exercise, and other. These categories were then analyzed and compared between the self-  
36  
37 identified exercisers and non-exercisers. In the results, it was noted when a code was  
38  
39 mentioned by all four focus groups or by both focus groups of each type (exercisers or non-  
40  
41 exercisers). Codes that were unique to only one type (exercisers or non-exercisers) were then  
42  
43 compared to the literature to determine if saturation was reached. Challenges with recruitment  
44  
45 of women to the study did not allow for subdivision into self-identified exercisers and non-  
46  
47 exercisers, and because data saturation could not be reached, themes from this group were  
48  
49 used to support findings of the other groups. Quotes from the interviews are provided for insight  
50  
51 into the identified themes.  
52  
53

54  
55  
56 *Patient and Public Involvement:*  
57  
58

1  
2  
3 Member checking involved review and discussion of the results with seven men who are part of  
4 our community advisory group. These men reflect characteristics of the focus group  
5 participants and provided input as to whether the focus group results resonated with their  
6 experiences.  
7  
8  
9  
10

### 11 12 13 **Results:**

14  
15  
16 Twenty-nine participants (Table 1) from 5 focus groups included 11 men who self-  
17 identified as exercisers (focus groups n=6, n=5), 14 men who self-identified as non-exercisers  
18 (focus groups n=8, n=6), and 4 women. Briefly, among the men, the median age was 57 years,  
19 the majority were white and college-educated men who have sex with men. The women had a  
20 median age of 56 years, the majority having some college education and sexual preference of  
21 men. Male participants had been living with HIV for approximately 20 years (range of 4 to 33  
22 years), and female participants for 15 years (range 4 to 27 years).  
23  
24  
25  
26  
27  
28  
29  
30  
31

### 32 **Motivators to and Benefits of Exercise**

33  
34  
35 A variety of motivators to exercise and benefits of exercise were reported by both  
36 exercising and non-exercising groups although, overall, non-exercisers mentioned far fewer  
37 benefits to exercise (n=46 mentions) than exercisers (n=75 mentions), Table 2. A shared theme  
38 was the benefit of being able to think more clearly, or a sense of self-reflection or meditation.  
39 For the exercisers, this was more often related to feeling mindful during exercise, “swimming is  
40 something like putting yourself in a meditative state. Which is relaxing and you know...it gives  
41 me a chance just to zone out by myself.” For the non-exercising group, they talked about how  
42 physical activity helped them to think more clearly, “...there is a physiological and mental aspect  
43 to it that is very refreshing. It [exercising] is good for your soul... It clears your mind”. Exercisers  
44 perceived a benefit on mood, mental health, and coping with stress. As one participant  
45 mentioned, “I was diagnosed bipolar about 18 years ago. And so I use exercise as a coping  
46  
47  
48  
49  
50  
51  
52  
53  
54  
55  
56  
57  
58  
59  
60

1  
2  
3 mechanism for when I'm depressed or when I'm manic...It grounds me". Exercise also helped to  
4 combat the effects of aging: "Well, I'm 60 and I didn't want anything headed south on me!".

5  
6  
7 The social aspects of exercise were recognized more commonly than the personal  
8 benefits in all groups, and nearly twice as often among exercisers: "...having a friend or a  
9 buddy to exercise with is a great motivator" (exerciser). Exercisers placed more importance on  
10 the motivating encouragement or positive reinforcement from family or peers: "Especially like  
11 people at church who I see every Sunday and they are like, keep doing it. Keep going. Keep  
12 going. You look great. But that positive reinforcement you know, building my self-esteem a little  
13 bit more and you know, remembering that makes me want to walk that half mile ...Cause then I  
14 know it's paying off" (exerciser). Non-exercisers reported the influence of the social  
15 environment or the community on motivation to start exercise. For example, one participant  
16 mentioned how much more motivated he was to be active when his community was more  
17 active, "not everybody can live in the mountain towns [more physically active towns] and they  
18 don't want to. But anyway I had a great network of friends up there. Socially and sports-wise"  
19 (non-exerciser). Additional motivators and benefits are detailed in Table 2.  
20  
21  
22  
23  
24  
25  
26  
27  
28  
29  
30  
31  
32  
33  
34  
35  
36

### 37 **Barriers to Exercise**

38  
39 Physical health, fatigue, injuries or hospitalizations were mentioned among both groups,  
40 but more commonly identified as barriers among non-exercisers. One patient related the  
41 physical health barriers following a hospitalization: "I ended up being in the hospital for a week  
42 with septic shock...up until that time, I was 100% fine...and then the next thing I know, I'm in the  
43 ICU and obviously after a week in the hospital, I was much weaker. But when I came home it  
44 was like wait, why am I getting winded? So my mind said I should be able to continue doing  
45 things at the level I was before. But my body wasn't doing that" (non-exerciser). Other themes  
46 discussed by both groups included having a lack of time ("work is just really an impediment",  
47  
48  
49  
50  
51  
52  
53  
54  
55  
56  
57  
58  
59  
60



1  
2  
3 non-exerciser), depression, and loss of a personal relationship (“when he left me, it zapped  
4 everything”; non-exerciser).  
5  
6

7 Prominent barriers discussed almost exclusively by the non-exercising group included:  
8 a lack of motivation or discipline, lack of a daily routine, or difficulty related to fatigue or other life  
9 struggles; “Sometimes it takes everything I have to get out of bed in the morning”. Poor exercise  
10 self-efficacy was also more commonly discussed among non-exercisers than exercisers. One  
11 participant described a strong desire to be active for health reasons, but faced challenges to  
12 establishing a regular workout routine, “But the motivation to believe in myself and to have the  
13 ability to know that I can do it again, would probably be the hardest part for me.” This also  
14 coincided with a lack of familiarity of exercise or lack of knowledge of newer technology, “First of  
15 all, there are technological advances that have happened since I spent any time in a gym. And I  
16 think...that when it comes to being inside a gym or something, I don’t know what the best order  
17 of machines would be. Or what is going to work for you.” Age-related barriers further contributed  
18 to low exercise self-efficacy. When one participant asked the group if he was the only one that  
19 felt fatigue, another replied, “I don't have a bundle of energy. I'm not bouncing off the walls, you  
20 know? Twenty years ago, I used to bounce off the walls 'cause I had so much [energy]...”. One  
21 group particularly bemoaned a lack of age-appropriate activities at gyms: “...they are not going  
22 to be able to fine-tune something that is more appropriate for someone my age or with various  
23 health issues and things like that.”  
24  
25  
26  
27  
28  
29  
30  
31  
32  
33  
34  
35  
36  
37  
38  
39  
40  
41  
42

43 Uniquely identified in the non-exercising groups was a negative perception of gym  
44 culture. Participants expressed disdain for younger gym members who were perceived to be  
45 more focused on their looks than health (“posers” was the term used by one participant) and for  
46 the general environment: “Another thing that really turned me off was during a couple decades  
47 period of time, the gym culture changed dramatically from just being a work-out place, to being  
48 these entertainment centers with pounding music and all this fancy gym clothes...one day I just  
49 walked in and the music was pounding and I said, you know, you got all these frickin’ queens  
50  
51  
52  
53  
54  
55  
56  
57  
58  
59  
60

1  
2  
3 posing like peacocks in the mirrors and I've had it." The gym was also perceived as a business  
4 more focused on selling a product than health, "I don't think they are interested in my health as  
5 much as they are trying to sell themselves and make money. I don't like that at all. Because  
6 they are not interested in me". In contrast to these negative perceptions expressed by non-  
7 exercisers, exercisers commented more on the aspects of community within the gym that they  
8 enjoyed.  
9  
10  
11  
12  
13  
14

15  
16 Exercisers noted a lack of social support as a barrier to exercise. When talking about a  
17 time period prior to being an exerciser, a participant related, "I had never lived for me. It was  
18 always about my partner or my parents or my teachers, or my friends. My whole life - 50 years -  
19 had revolved around what somebody else wanted for me." Another expression of this theme  
20 was related to simply not having a social group with which to participate in activity, "...Before my  
21 partner passed away, we used to like to go up in the mountains and go hiking. But right now it is  
22 like...I don't know anybody around here that enjoys doing it. So this summer I haven't gone  
23 hiking at all. I take [my dog] out for his walks. But it's like...I just, you know...I don't know  
24 anybody to go hiking with so...".  
25  
26  
27  
28  
29  
30  
31  
32  
33  
34  
35  
36

### 37 **Ideal Environment for Exercise**

38  
39 When participants were asked to describe ideal exercise conditions, many of the  
40 answers related back to the motivators and barriers (Table 2). For both groups, cost and access  
41 were important factors. Multiple groups mentioned benefits of the insurance-sponsored  
42 programs or reduced-cost community centers, or expressed intentions of investigating such  
43 programs. Type of exercise was also related to cost for some participants, "I actually kind of  
44 enjoy going out for a run. It doesn't cost me anything. It's free" (exerciser). Interpersonal and  
45 social factors were important factors for both groups, with every group describing an aspect of  
46 the social environment that they thought was important, whether an "exercise buddy" or a  
47  
48  
49  
50  
51  
52  
53  
54  
55  
56  
57  
58  
59  
60

1  
2  
3 welcoming environment: “If someone was genuinely interested in working with me and when I  
4 say, generally interested in it from a social perspective. You know?” (non-exerciser).  
5  
6

7 We also posed the question of what would be the preferred exercise community.  
8  
9 Opinions differed across groups: some felt that they would appreciate having a gym that  
10 catered to PLWH exclusively whereas others were opposed to this idea. Non-exercisers  
11 preferred a gym or program that catered to older adults: “...having people around you that are of  
12 a similar age. You know? You don't feel ...I don't know if it's threatened or whatever, but you  
13 just feel more at ease. You know?” Non-exercisers were also more interested in the types of  
14 activities available at the gym and the facilities, and in particular, mentioned the importance of  
15 having age-appropriate activities. When describing an acceptable gym format, one participant  
16 stated, “what I liked about [the gym]... all the machines are in a circle and it's just for seniors”.  
17  
18 This group also mentioned dedicated instruction as something that would be a part of their ideal  
19 gym, or clear instructions that would help them to get started if they were not familiar with a  
20 given exercise.  
21  
22  
23  
24  
25  
26  
27  
28  
29  
30  
31  
32  
33  
34  
35  
36

### 37 **Other Factors Acting As Barriers to Exercise or Physical Activity**

38  
39 Throughout the discussion of physical activity and exercise, many other factors were  
40 acknowledged, though not directly in the context of exercise or physical activity. These topics  
41 related to life challenges that the participants faced, including drug abuse, feeling unsafe in their  
42 neighborhood, lack of affordable housing, mental health issues, or stigma related to HIV, sexual  
43 preference, or age. Every group had unprompted discussion about social isolation, or loss of  
44 friends or partners due to HIV or other reasons, “Now that I'm older, I don't have any 'gay  
45 friends' anymore. And I wonder, is it me? Or have they gone somewhere? I mean a lot of them  
46 died...But like, I don't have any gay friends. My friends are accepting of me even they know I  
47  
48  
49  
50  
51  
52  
53  
54  
55  
56  
57  
58  
59  
60

1  
2  
3 am, but I don't have any. Do you all have any friends who are HIV positive?" This limited group  
4 of gay friends threatens the important social support motivator for exercise.  
5  
6  
7

## 8 9 **Discussion:**

10  
11 As the SEM is frequently used to inform the personal and societal factors that influence  
12 physical activity, we anticipated that our participants would identify the contribution of each level  
13 to their own exercise and physical activity behaviors<sup>22 25 26</sup>. We instead found that participants  
14 focused much more on the personal physical, mental, and social factors. While environment  
15 came up as a deterrent for non-exercisers (negative gym culture), policy was seldom  
16 recognized as an influence on physical activity. The most salient theme identified that may  
17 serve as an target for future policy-level changes would be access (cost and transportation) to a  
18 gym, which was identified as a barrier by both exercisers and non-exercisers. The lack of  
19 connection with the gay community was also mentioned, but participants did not directly connect  
20 that to physical activity. Furthermore, exercisers and non-exercisers recognized some similar,  
21 but also unique, barriers and facilitators to routine exercise or physical activity that are important  
22 to consider when designing lifestyle interventions for older PLWH.  
23  
24  
25  
26  
27  
28  
29  
30  
31  
32  
33  
34  
35  
36

37 Physical health was identified as both a major barrier and a motivating factor to exercise.  
38 The exercisers were more likely to mention the health-related benefits of exercise, report  
39 increased energy, and acknowledge the importance of exercise towards improving overall  
40 health, as has been reported previously in the general exercise literature<sup>26</sup>. Despite the  
41 medical advances of HIV management with antiretroviral therapy, older PLWH appear to  
42 experience age-associated comorbidities at a higher rate and at a younger age than the general  
43 population<sup>2 35</sup>. The physical barriers attributed to HIV and medications, generalized fatigue, or  
44 chronic pain by our participants are consistently identified as barriers to exercise among PLWH  
45  
46  
47  
48  
49  
50  
51  
52  
53  
54  
55  
56  
57  
58  
59  
60  
28 31-33 36. To engage older PLWH, exercise interventions must acknowledge and address these  
physical barriers.

1  
2  
3 All groups discussed the impact of depression and loss in their exercise behaviors (or  
4 life) but the positive impact of exercise on mood and mental health was most often recognized  
5 by the exercisers. These results are consistent with a recent meta-analysis that found aerobic  
6 and resistance exercise interventions had positive effects on various domains of mental health  
7 such as stress, anxiety and depressive symptoms in PLWH<sup>37</sup>. In contrast, mental health-related  
8 barriers to physical activity are well-described among other populations of PLWH<sup>28 32 33</sup>, and  
9 depression has been correlated with decreased PA levels in both PLWH and in the general  
10 population<sup>26 38</sup>. Depression as a barrier to exercise is of particular relevance given that PLWH  
11 have up to three times the rate of depression as the general population<sup>5</sup>, and that perceived  
12 well-being may be associated with adherence to an exercise regimen<sup>39</sup>. Among the exercisers,  
13 the mental health benefits of exercise were an important factor in the maintenance of physical  
14 activity and thus is an important domain to emphasize in future exercise intervention studies.

15  
16  
17  
18  
19  
20  
21  
22  
23  
24  
25  
26  
27  
28 One of the more striking differences between exercisers and non-exercisers was related  
29 to a lack of exercise motivation and exercise self-efficacy among the non-exercisers. Self-  
30 efficacy has consistently been identified as one of strongest correlates of exercise behavior in  
31 adults in general<sup>25-27 40 41</sup> and PLWH<sup>38 39</sup>. Self-efficacy is commonly defined as an individual's  
32 confidence in their ability to complete a task or series of actions, in this case the ability to  
33 exercise safely and effectively. Self-efficacy may interact with motivation to exercise, such that  
34 an individual with poor exercise self-efficacy has poor recognition of exercise benefits, less  
35 confidence in exercise ability, and therefore, less motivation to initiate exercise<sup>42</sup>. The non-  
36 exercising group identified a number of themes related to poor self-efficacy including changing  
37 technology in gyms, older age, and poor health. Similarly, non-exercisers identified  
38 interventions that may help overcome the lack of self-efficacy, including access to specific  
39 instruction or wellness facilities that cater to older adults.

40  
41  
42  
43  
44  
45  
46  
47  
48  
49  
50  
51  
52  
53  
54 The social aspects of exercise or physical activity were strong motivators or benefits  
55 among both groups: Exercisers were more likely to mention encouragement from others as an  
56  
57  
58  
59  
60

1  
2  
3 important motivator, whereas non-exercisers focused on the general social environment, rather  
4 than the exercise-specific environment. Social isolation and a desire to connect with other social  
5 groups were discussed by all participants, though not directly in the context of exercise. The  
6 importance of social support in exercise has been described among PLWH, whether as a  
7 “workout buddy”, general community activities, or more social support in general <sup>28 29 32 33</sup>. Older  
8 PLWH have high rates of social isolation, and may have challenges related to loss of friends  
9 due to illness, or estrangement from family due to HIV or other stigma <sup>6 43</sup>. Social support has  
10 been associated with greater physical activity, and loneliness with decreased physical activity <sup>44</sup>.  
11 Effective physical activity initiation and maintenance among older PLWH may be strengthened  
12 by a robust social environment.  
13  
14  
15  
16  
17  
18  
19  
20  
21  
22  
23

24 A unique finding was the negative perception of gym culture, recognized to the greatest  
25 extent among non-exercisers. The younger community at a gym was perceived as non-  
26 welcoming, and participants instead desired a genuine community that connected with them as  
27 individuals rather than as a depersonalized customer. There was little consensus among our  
28 focus groups regarding what an ideal exercise or physically active community would look like,  
29 particularly among the non-exercising group. In our previous work among older men with HIV  
30 enrolled in an exercise intervention, participants discussed the appeal of a gym community for  
31 older PLWH<sup>34</sup>. Here, however, we found this concept to be contentious, some citing a desire for  
32 connection with similar others (older and/or with HIV), but others relating a desire for privacy  
33 and concerns about disclosure due to HIV stigma, noted as a barrier to exercise in prior studies  
34 of PLWH <sup>29 31</sup>. Based on the data from these focus groups, the welcoming environment of a new  
35 gym or activity may be particularly important to those not currently exercising, and activities  
36 targeted for older adults may be beneficial. Aside from gym culture, the role of organizational,  
37 community, and policy factors (access, cost, indirect barriers such as insecure housing and  
38 affordable food, and the built environment) were discussed but not dominant. These commonly  
39  
40  
41  
42  
43  
44  
45  
46  
47  
48  
49  
50  
51  
52  
53  
54  
55  
56  
57  
58  
59  
60

1  
2  
3 reported barriers to physical activity in the general population are a focus of public health and  
4 policy interventions <sup>24 26 27 45 46</sup>.

7 Our study has several limitations. The majority of our participants were white college-  
8 educated men, limiting the generalizability of our findings. Themes that were mentioned by the  
9 women's group that merit further exploration include the importance of health-related barriers to  
10 exercise and placing higher value on an active lifestyle as opposed to structured exercise.  
11 Additionally, our participants were self-identified as exercisers or non-exercisers with no  
12 objective verification of their actual amount of type of physical activity. While many of the  
13 themes our participants discussed are supported by the literature, ideas about barriers due to  
14 gym culture and business models has not been reported to our knowledge, and our focus  
15 groups may not have been sufficient to provide saturation on these specific topics. When these  
16 results were reported to our community advisory group, they agreed that many corporate gyms  
17 had an unfriendly environment, but that perhaps smaller recreation centers might have more of  
18 a welcoming atmosphere that our participants desired.  
19  
20  
21  
22  
23  
24  
25  
26  
27  
28  
29  
30  
31  
32  
33  
34

### 35 **Conclusions**

36  
37 In summary, inter- and intrapersonal factors, including an emphasis on social  
38 connection, were central to exercise behaviors among older adults with HIV whereas  
39 organizational, community, and policy level factors of the SEM were minor contributors. While  
40 addressing these higher-level SEM domains may be important for long-term and large-scale  
41 exercise and physical activity dissemination and maintenance, strategies to promote physical  
42 activity in older PLWH may need to focus on overcoming physical barriers and providing a safe  
43 and welcoming social environment.  
44  
45  
46  
47  
48  
49  
50  
51  
52  
53  
54  
55  
56  
57  
58  
59  
60

**Funding Statement:**

Funding: This research was funded through the National Institutes of Health, National Institute on Aging (K23 AG050260 to KME) and NCATS Colorado CTSA (UL1 TR002535). Contents are the authors' sole responsibility and do not necessarily represent official NIH views.

**Data Statement section:**

Although de-identified, transcribed data may provide personal information that could be linked to individual participants. Codebooks or sections of the transcripts that are not felt to be identifiable may be provided upon request of the corresponding author. Provision is dependent upon approval of the Institutional Review Board.

**Author Contributions:**

NAJ, HN, and KME developed the initial codebook, with input from CJM. KME led the interview sessions with additional input from NAJ and CJM. Data coding was completed by Sara Dunham (see below), NAJ, and KME, with input from CJM, YKG, and HN if consensus was not achieved. NAJ prepared the first manuscript draft; all authors contributed to, reviewed, and approved the final manuscript.

**Acknowledgements:**

Sarah Dunham, MPH also coded data.

**Competing Interests:**

KME has received funding for research paid to the University of Colorado from Gilead Sciences, and has received funding for advisory panel from Viiv Healthcare.



## References

1. Smit M, Brinkman K, Geerlings S, et al. Future challenges for clinical care of an ageing population infected with HIV: a modelling study. *The Lancet Infectious Diseases* 2015;15(7):810-18.
2. Deeks SG. HIV infection, inflammation, immunosenescence, and aging. *Annual review of medicine* 2011;62:141-55.
3. Castillo-Mancilla JR, Brown TT, Erlandson KM, et al. Suboptimal adherence to combination antiretroviral therapy is associated with higher levels of inflammation despite HIV suppression. *Clinical Infectious Diseases* 2016:ciw650.
4. Kaufman MR, Cornish F, Zimmerman RS, et al. Health Behavior Change Models for HIV Prevention and AIDS Care: Practical Recommendations for a Multi-Level Approach. *Journal of Acquired Immune Deficiency Syndromes (1999)* 2014;66(Suppl 3):S250-S58. doi: 10.1097/QAI.0000000000000236
5. Do AN, Rosenberg ES, Sullivan PS, et al. Excess burden of depression among HIV-infected persons receiving medical care in the United States: data from the medical monitoring project and the behavioral risk factor surveillance system. *PLoS One* 2014;9(3):e92842.
6. Emler CA. An examination of the social networks and social isolation in older and younger adults living with HIV/AIDS. *Health & social work* 2006;31(4):299-308.
7. Botros D, Somarriba G, Neri D, et al. Interventions to address chronic disease and HIV: strategies to promote exercise and nutrition among HIV-infected individuals. *Current HIV/AIDS Reports* 2012;9(4):351-63.
8. O'Brien KK, Tynan AM, Nixon SA, et al. Effectiveness of aerobic exercise for adults living with HIV: systematic review and meta-analysis using the Cochrane Collaboration protocol. *BMC Infect Dis* 2016;16:182. doi: 10.1186/s12879-016-1478-2 [published Online First: 2016/04/27]

- 1  
2  
3 9. O'Brien KK, Tynan AM, Nixon SA, et al. Effectiveness of Progressive Resistive Exercise  
4  
5 (PRE) in the context of HIV: systematic review and meta-analysis using the Cochrane  
6  
7 Collaboration protocol. *BMC Infect Dis* 2017;17(1):268. doi: 10.1186/s12879-017-2342-8  
8  
9 [published Online First: 2017/04/14]  
10
- 11  
12 10. Nixon S, O'Brien K, Glazier RH, et al. Aerobic exercise interventions for people with  
13  
14 HIV/AIDS. *The Cochrane database of systematic reviews* 2001(1):Cd001796. doi:  
15  
16 10.1002/14651858.Cd001796 [published Online First: 2001/05/02]  
17
- 18  
19 11. Nixon S, O'Brien K, Glazier RH, et al. Aerobic exercise interventions for adults living with  
20  
21 HIV/AIDS. *The Cochrane database of systematic reviews* 2002(2):Cd001796. doi:  
22  
23 10.1002/14651858.Cd001796 [published Online First: 2002/06/22]  
24
- 25  
26 12. O'Brien K, Nixon S, Glazier RH, et al. Progressive resistive exercise interventions for adults  
27  
28 living with HIV/AIDS. *The Cochrane database of systematic reviews* 2004(4):Cd004248.  
29  
30 doi: 10.1002/14651858.CD004248.pub2 [published Online First: 2004/10/21]  
31
- 32  
33 13. Nixon S, O'Brien K, Glazier RH, et al. Aerobic exercise interventions for adults living with  
34  
35 HIV/AIDS. *The Cochrane database of systematic reviews* 2005(2):Cd001796. doi:  
36  
37 10.1002/14651858.CD001796.pub2 [published Online First: 2005/04/23]  
38
- 39  
40 14. O'Brien K, Nixon S, Tynan AM, et al. Aerobic exercise interventions for adults living with  
41  
42 HIV/AIDS. *The Cochrane database of systematic reviews* 2010(8):Cd001796. doi:  
43  
44 10.1002/14651858.CD001796.pub3 [published Online First: 2010/08/06]  
45
- 46  
47 15. Jagers J, Hand G, Dudgeon W, et al. Aerobic and resistance training improves mood state  
48  
49 among adults living with HIV. *International journal of sports medicine* 2015;36(02):175-  
50  
51 81.  
52
- 53  
54 16. Neto MG, Conceição CS, Carvalho VO, et al. Effects of combined aerobic and resistance  
55  
56 exercise on exercise capacity, muscle strength and quality of life in HIV-infected  
57  
58 patients: a systematic review and meta-analysis. *PloS one* 2015;10(9):e0138066.  
59  
60

- 1  
2  
3 17. O'Brien KK, Tynan A-M, Nixon SA, et al. Effectiveness of aerobic exercise for adults living  
4 with HIV: systematic review and meta-analysis using the Cochrane Collaboration  
5 protocol. *BMC infectious diseases* 2016;16(1):182.  
6  
7
- 8  
9 18. Fazeli PL, Marquine MJ, Dufour C, et al. Physical Activity is Associated with Better  
10 Neurocognitive and Everyday Functioning Among Older Adults with HIV Disease. *AIDS*  
11 *Behav* 2015;19(8):1470-7. doi: 10.1007/s10461-015-1024-z [published Online First:  
12 2015/03/04]  
13  
14
- 15 19. O'Brien KK, Solomon P, Trentham B, et al. Evidence-informed recommendations for  
16 rehabilitation with older adults living with HIV: a knowledge synthesis. *BMJ Open*  
17 2014;4(5) doi: 10.1136/bmjopen-2013-004692  
18  
19
- 20 20. Vancampfort D, Mugisha J, De Hert M, et al. Sedentary Behavior in People Living With HIV:  
21 A Systematic Review and Meta-Analysis. *Journal of physical activity & health*  
22 2017;14(7):571-77. doi: 10.1123/jpah.2016-0507 [published Online First: 2017/03/16]  
23  
24
- 25 21. Vancampfort D, Mugisha J, De Hert M, et al. Global physical activity levels among people  
26 living with HIV: a systematic review and meta-analysis. *Disabil Rehabil* 2018;40(4):388-  
27 97. doi: 10.1080/09638288.2016.1260645 [published Online First: 2016/12/09]  
28  
29
- 30 22. Sallis JF, Owen N, Fisher E. Ecological models of health behavior. *Health behavior: Theory,*  
31 *research, and practice* 2015;5:43-64.  
32  
33
- 34 23. McLeroy KR, Bibeau D, Steckler A, et al. An ecological perspective on health promotion  
35 programs. *Health education quarterly* 1988;15(4):351-77.  
36  
37
- 38 24. Macera CA, Cavanaugh A, Bellettiere J. State of the art review: Physical activity and older  
39 adults. *American Journal of Lifestyle Medicine* 2017;11(1):42-57.  
40  
41
- 42 25. Trost SG, Owen N, Bauman AE, et al. Correlates of adults' participation in physical activity:  
43 review and update. *Medicine & Science in Sports & Exercise* 2002;34(12):1996-2001.  
44  
45  
46  
47  
48  
49  
50  
51  
52  
53  
54  
55  
56  
57  
58  
59  
60

- 1  
2  
3 26. Bauman AE, Reis RS, Sallis JF, et al. Correlates of physical activity: why are some people  
4 physically active and others not? *Lancet (London, England)* 2012;380(9838):258-71. doi:  
5 10.1016/s0140-6736(12)60735-1 [published Online First: 2012/07/24]  
6  
7  
8  
9 27. Schutzer KA, Graves BS. Barriers and motivations to exercise in older adults. *Preventive*  
10 *medicine* 2004;39(5):1056-61.  
11  
12 28. Simonik A, Vader K, Ellis D, et al. Are you ready? Exploring readiness to engage in exercise  
13 among people living with HIV and multimorbidity in Toronto, Canada: a qualitative study.  
14 *BMJ open* 2016;6(3):e010029.  
15  
16 29. Ley C, Barrio MR, Leach L. Suppl 1: M6: social-ecological, motivational and volitional factors  
17 for initiating and maintaining physical activity in the context of HIV. *The open AIDS*  
18 *journal* 2015;9:96.  
19  
20 30. Webel AR, Perazzo JD, Dawson-Rose C, et al. A multinational qualitative investigation of  
21 the perspectives and drivers of exercise and dietary behaviors in people living with HIV.  
22 *Applied Nursing Research* 2017;37:13-18.  
23  
24 31. Nguyen AL, Lake JE, Reid MC, et al. Attitudes towards exercise among substance using  
25 older adults living with HIV and chronic pain. *AIDS care* 2017;29(9):1149-52. doi:  
26 10.1080/09540121.2017.1325437  
27  
28 32. Roos R, Myezwa H, van Aswegen H. "Not easy at all but I am trying": barriers and  
29 facilitators to physical activity in a South African cohort of people living with HIV  
30 participating in a home-based pedometer walking programme. *AIDS care*  
31 2015;27(2):235-39.  
32  
33 33. Montoya JL, Wing D, Knight A, et al. Development of an mHealth Intervention (iSTEP) to  
34 promote physical activity among people living with HIV. *Journal of the International*  
35 *Association of Providers of AIDS Care (JIAPAC)* 2015;14(6):471-75.  
36  
37  
38  
39  
40  
41  
42  
43  
44  
45  
46  
47  
48  
49  
50  
51  
52  
53  
54  
55  
56  
57  
58  
59  
60

- 1  
2  
3 34. Neff HA, Kellar-Guenther Y, Jankowski CM, et al. Turning disability into ability: barriers and  
4  
5 facilitators to initiating and maintaining exercise among older men living with HIV. *AIDS*  
6  
7 *care* 2018;1-5.  
8  
9  
10 35. Justice AC. HIV and aging: time for a new paradigm. *Current HIV/AIDS Reports*  
11  
12 2010;7(2):69-76.  
13  
14 36. Brown D, Claffey A, Harding R. Evaluation of a physiotherapy-led group rehabilitation  
15  
16 intervention for adults living with HIV: referrals, adherence and outcomes. *AIDS care*  
17  
18 2016;28(12):1495-505. doi: 10.1080/09540121.2016.1191611  
19  
20 37. Nosrat S, Whitworth JW, Ciccolo JT. Exercise and mental health of people living with HIV: A  
21  
22 systematic review. *Chronic illness* 2017;13(4):299-319.  
23  
24 38. Vancampfort D, Mugisha J, Richards J, et al. Physical activity correlates in people living with  
25  
26 HIV/AIDS: a systematic review of 45 studies. *Disability and Rehabilitation*  
27  
28 2018;40(14):1618-29. doi: 10.1080/09638288.2017.1306587  
29  
30 39. Petróczi A, Hawkins K, Jones G, et al. HIV Patient Characteristics that Affect Adherence to  
31  
32 Exercise Programmes: An Observational Study. *The open AIDS journal* 2010;4:148-55.  
33  
34 doi: 10.2174/1874613601004010148  
35  
36 40. McAuley E, Szabo A, Gothe N, et al. Self-efficacy: implications for physical activity, function,  
37  
38 and functional limitations in older adults. *American journal of lifestyle medicine*  
39  
40 2011;5(4):361-69.  
41  
42 41. Koeneman MA, Verheijden MW, Chinapaw MJM, et al. Determinants of physical activity and  
43  
44 exercise in healthy older adults: A systematic review. *International Journal of Behavioral*  
45  
46 *Nutrition and Physical Activity* 2011;8(1):142. doi: 10.1186/1479-5868-8-142  
47  
48 42. Gray L, Chalabaev A, Durant J, et al. Exercise stereotypes and fatigue in people living with  
49  
50 HIV: does self-efficacy play a mediating or a moderating role? *Archives of Public Health*  
51  
52 2018;76(1):23.  
53  
54  
55  
56  
57  
58  
59  
60

- 1  
2  
3 43. Schrimshaw EW, Siegel K. Perceived barriers to social support from family and friends  
4  
5 among older adults with HIV/AIDS. *Journal of Health Psychology* 2003;8(6):738-52.  
6  
7 44. Smith GL, Banting L, Eime R, et al. The association between social support and physical  
8  
9 activity in older adults: a systematic review. *International Journal of Behavioral Nutrition*  
10  
11 *and Physical Activity* 2017;14(1):56.  
12  
13 45. Prince SA, Reed JL, McFetridge C, et al. Correlates of sedentary behaviour in adults: a  
14  
15 systematic review. *Obesity reviews : an official journal of the International Association for*  
16  
17 *the Study of Obesity* 2017;18(8):915-35. doi: 10.1111/obr.12529 [published Online First:  
18  
19 2017/05/20]  
20  
21  
22 46. Thornton CM, Kerr J, Conway TL, et al. Physical Activity in Older Adults: an Ecological  
23  
24 Approach. *Annals of Behavioral Medicine* 2017;51(2):159-69. doi: 10.1007/s12160-016-  
25  
26 9837-1  
27  
28  
29  
30  
31  
32  
33  
34  
35  
36  
37  
38  
39  
40  
41  
42  
43  
44  
45  
46  
47  
48  
49  
50  
51  
52  
53  
54  
55  
56  
57  
58  
59  
60

Table 1. Participant Characteristics

|                                             | Exercising Men<br>(n=11) | Non-exercising<br>Men (n=14) | Women (Non-exercisers<br>and Exercisers, n=4) |
|---------------------------------------------|--------------------------|------------------------------|-----------------------------------------------|
| Age <sup>a</sup>                            | 57 (53, 61)              | 58 (53, 65)                  | 56 (53,61)                                    |
| Race <sup>b</sup>                           |                          |                              |                                               |
| White                                       | 10 (91)                  | 8 (57)                       | 2 (50)                                        |
| Black                                       | 1 (9)                    | 3 (21)                       | 1 (25)                                        |
| Other                                       | 0 (0)                    | 3 (21)                       | 1 (25)                                        |
| Ethnicity <sup>b</sup>                      |                          |                              |                                               |
| Hispanic or Latino                          | 1 (9)                    | 2 (14)                       | 1 (25)                                        |
| Not Hispanic / Unknown                      | 10 (91)                  | 12 (86)                      | 3 (75)                                        |
| Education <sup>b</sup>                      |                          |                              |                                               |
| Some high school                            | 0 (0)                    | 0 (0)                        | 1 (25)                                        |
| High school or equivalent                   | 4 (36)                   | 2 (14)                       | 0 (0)                                         |
| Some college                                | 3 (27)                   | 5 (36)                       | 3 (75)                                        |
| College degree                              | 3 (27)                   | 2 (14)                       | 0 (0)                                         |
| Post-graduate work                          | 1 (9)                    | 5 (36)                       | 0 (0)                                         |
| Employment <sup>b</sup>                     |                          |                              |                                               |
| On disability                               | 6 (55)                   | 4 (29)                       | 0 (0)                                         |
| Unemployed                                  | 0 (0)                    | 5 (36)                       | 3 (75)                                        |
| Retired                                     | 3 (27)                   | 4 (29)                       | 0 (0)                                         |
| Full-time                                   | 2 (18)                   | 2 (14)                       | 0 (0)                                         |
| Part-time                                   | 0 (0)                    | 0 (0)                        | 1 (25)                                        |
| Years since HIV diagnosis <sup>a</sup>      | 20 (14, 27)              | 20 (11, 27)                  | 15 (4,27)                                     |
| Sexual Preference <sup>b</sup>              |                          |                              |                                               |
| Men                                         | 8 (73)                   | 13 (93)                      | 4 (100)                                       |
| Women                                       | 2 (18)                   | 1 (7)                        | 0 (0)                                         |
| Other                                       | 1 (9)                    | 0 (0)                        | 0 (0)                                         |
| Self-Reported Co-morbidities <sup>b,c</sup> |                          |                              |                                               |
| Hypertension                                | 4 (29)                   | 4 (29)                       | 2 (50)                                        |
| Hyperlipidemia                              | 4 (29)                   | 2 (14)                       | 0 (0)                                         |
| Diabetes                                    | 0 (0)                    | 2 (14)                       | 0 (0)                                         |
| Depression / anxiety <sup>b</sup>           | 7 (64)                   | 9 (64)                       | 3 (75)                                        |
| Osteoporosis <sup>b</sup>                   | 0 (0)                    | 1 (7)                        | 0 (0)                                         |

Presented as a) median with interquartile range (IQR) or b) frequency (%).

c. language used on the survey instrument for self-reported co-morbidities was as follows: Have you ever been told by a doctor that you have any of the following medical problems? High blood pressure, high cholesterol, diabetes, depression or anxiety, osteoporosis.

Table 2. Themes, sub-themes, and frequency of times mentioned across focus groups.

| Main Theme                                 | Sub-theme                 | Example                                                                                                                                                                                                                                                                                                                                                                                                                                                                                           | Count of Times Discussed in Each Group |                         |                                           |
|--------------------------------------------|---------------------------|---------------------------------------------------------------------------------------------------------------------------------------------------------------------------------------------------------------------------------------------------------------------------------------------------------------------------------------------------------------------------------------------------------------------------------------------------------------------------------------------------|----------------------------------------|-------------------------|-------------------------------------------|
|                                            |                           |                                                                                                                                                                                                                                                                                                                                                                                                                                                                                                   | Exercising Men N=11                    | Non-exercising Men N=14 | Women (Exercisers and Non-exercisers) N=4 |
| <b>Motivators and benefits to exercise</b> |                           |                                                                                                                                                                                                                                                                                                                                                                                                                                                                                                   |                                        |                         |                                           |
| Intrapersonal                              | Sense of accomplishment   | <p>“For me, yeah. It's a badge of something. It is an achievement”</p> <p>“and I was so proud of myself cause that was the first time that I'd danced in so long”</p> <p>“And I'll set, for instance on my stationary bike how far I'm going to go. And try to achieve that. And I really feel good when I achieve that goal. And probably move it up a little bit the next time”</p>                                                                                                             | 10                                     | 5                       | 0                                         |
|                                            | Health-related motivators | <p>“But I guess one of my goals is that I am self-sufficient and able to live in my own home. We own our own home. I want to be able to stay in my own home. That's important to me”</p> <p>“So it is like yeah, I've got to exercise. Keep eating, but keep exercising so I don't blow up like a balloon. Because if I do, I'm not going to walk again”</p> <p>“If you want to live longer, you have to get a trainer and join a gym. He said lean muscle mass and organ tissue is the key.”</p> | 23                                     | 6                       | 12                                        |
|                                            | Positive mood change      | <p>“For me it is a lot of a reliever of stress. It gives you that freedom in your head. You feel much better, you know?”</p> <p>“And my partner many years ago suggested and encouraged me to find some kind of exercise that I enjoyed. And it was that encouragement that I discovered the pool. And I went over there and to this day, I believe that for some reason, just simply being in the water is like a safe zone for depression.”</p>                                                 | 22                                     | 11                      | 3                                         |
|                                            | Increased energy          | <p>“And by exercising, I find I get a lot more energy than if I'm just sitting around like a couch potato, not doing anything. So...I try to make it a regular part of my life”</p> <p>“I just have lived through a variety of things I could do to improve my vitality and I've found that exercise is the most energizing.”</p>                                                                                                                                                                 | 13                                     | 3                       | 4                                         |
|                                            | Thinking is clearer       | <p>“[when asked to describe how he feels when exercising] Focused and present. Mindful and serene.”</p>                                                                                                                                                                                                                                                                                                                                                                                           | 9                                      | 15                      | 2                                         |



|                             |                                                                                               |                                                                                                                                                                                                                                                                                                                                                                                                                                                                                                                                                                                                                                                                                                                                                                                                                                                              |    |    |    |
|-----------------------------|-----------------------------------------------------------------------------------------------|--------------------------------------------------------------------------------------------------------------------------------------------------------------------------------------------------------------------------------------------------------------------------------------------------------------------------------------------------------------------------------------------------------------------------------------------------------------------------------------------------------------------------------------------------------------------------------------------------------------------------------------------------------------------------------------------------------------------------------------------------------------------------------------------------------------------------------------------------------------|----|----|----|
|                             |                                                                                               |                                                                                                                                                                                                                                                                                                                                                                                                                                                                                                                                                                                                                                                                                                                                                                                                                                                              |    |    |    |
| Interpersonal               | Social activities outside of exercise                                                         | <p>"I've found that if you have a lot of people who are more active, you tend to be more active."</p> <p>"I think the community part of it connects me. So I want to go [to the gym] at the same time cause I know the same people are going to be there. It gets me on that schedule."</p> <p>"And for many years, what got me over to the pool was knowing I would see people that I enjoyed being with. And then I would spend the first hour socializing and you know, we had a routine where we'd visit for quite a while"</p>                                                                                                                                                                                                                                                                                                                          | 12 | 18 | 7  |
| <b>Barriers to exercise</b> |                                                                                               |                                                                                                                                                                                                                                                                                                                                                                                                                                                                                                                                                                                                                                                                                                                                                                                                                                                              |    |    |    |
| Intrapersonal               | Physical health (medication side effects, fatigue, disability, other health responsibilities) | <p>"Well, it's funny that you mention the chemo and stuff, because after I got done with the Interferon for the Hep C treatment, I noticed my energy level was zapped. And even to this day, I'm not back to where I was 7 1/2 years ago, prior to starting that, you know?"</p> <p>"And then I got really sick and I had a lot of problems with my legs and I wasn't really able to walk. And then I had to battle that, even though it was a missed diagnosis. I had a PIC line for 6 months, so I didn't work out for that period either. And so there were medical reasons and drug reasons why I didn't work out."</p> <p>"Well, you know...I'm not very active. I have a spinal thing going on. And...they are probably going to have to operate on. So I've been kind of out of the exercise program...I was in the hospital for about 9 months."</p> | 20 | 36 | 20 |
|                             | Lack of motivation or self-efficacy                                                           | <p>"I mean...trying to get motivated at an older age is difficult cause you do have to be motivated and you do have to be focused. But...it is just not there really..."</p> <p>"So I could go back into something that I feel like I'm comfortable in. But the motivation to believe in myself and to have the ability to know that I can do it again, would probably be the hardest part for me."</p>                                                                                                                                                                                                                                                                                                                                                                                                                                                      | 3  | 21 | 8  |
|                             | Age-related barriers                                                                          | <p>"I think one of the biggest problems with gyms today, they are activities. And there are a lot of them that are ...their focus is younger people. They don't have age related...they don't cater to, you know, the broader demographics of society"</p> <p>"That's why I don't play any hockey because it would take me a week to recuperate. When you are younger, it takes a couple hours and you are good to go."</p>                                                                                                                                                                                                                                                                                                                                                                                                                                  | 3  | 17 | 9  |

|                               |                                                                                                  |                                                                                                                                                                                                                                                                                                                                                                                                                                                                                                                                                |    |    |    |
|-------------------------------|--------------------------------------------------------------------------------------------------|------------------------------------------------------------------------------------------------------------------------------------------------------------------------------------------------------------------------------------------------------------------------------------------------------------------------------------------------------------------------------------------------------------------------------------------------------------------------------------------------------------------------------------------------|----|----|----|
| Interpersonal                 | Social factors (caregiver burden, lack of social group, lack of support from family and friends) | <p>“But I'm finding myself more and more and more just staying in the apartment for a number of reasons. Number one, I don't have anybody to do anything with.”</p> <p>“Yeah. I have a problem with accountability. Doing it by myself is hard to do.”</p>                                                                                                                                                                                                                                                                                     | 9  | 3  | 10 |
| Environmental                 | Comfort at the gym                                                                               | <p>“I don't want to get naked at the gym anymore and I like getting naked to use the facility. I mean you know, you take a shower and you take a steam. But I just don't want to do it anymore.”</p> <p>“But I got so embarrassed because there were probably mostly women. Elderly. And they would hand the pin at #10 to be able to do each machine. And I couldn't do 10. So I would ...So I would sit down and watch the women. And they would see...I got so embarrassed...so I would deliberately put it back to 10 and I was done.”</p> | 2  | 10 | 5  |
|                               | Gym culture                                                                                      | <p>“I always assume I am going to be sold. Like there is going to be a sales person there at the gym of some sort, that is going to sell me on some package or something... They aren't really concerned about my needs but what they can get out of me.”</p>                                                                                                                                                                                                                                                                                  | 3  | 23 | 1  |
| <b>Ideal gym / next steps</b> |                                                                                                  |                                                                                                                                                                                                                                                                                                                                                                                                                                                                                                                                                |    |    |    |
| Facility level factors        | Cost                                                                                             | <p>“Back when I used to go to the gym, to the public gym, the charges were like 5.00 a year or something...but man, it is hundreds of dollars now.”</p> <p>“Again, feel the same. I look at exercise...going to a gym. I wouldn't mind going to a gym...if I could afford it.”</p>                                                                                                                                                                                                                                                             | 11 | 14 | 5  |
|                               | Amenities (age appropriate and varied activities, instructions, good facilities)                 | <p>“So maybe have like the ones that cater to the 20 to 30, maybe 30 to 40 and someone that caters to the 40 to 40 plus year olds?”</p> <p>“I'd much rather not ask questions about something. Like if the machine had a basic sign that it is used for this. And best to be used after this...kind of a 5 point user's manual.”</p> <p>“I like a clean gym where things are working, you know? Where parking is easy.”</p>                                                                                                                    | 3  | 11 | 2  |
| Social factors                | Who is at the gym                                                                                | <p>“I just want to be by myself at the gym...I mean if they had a gym for HIV, I still wouldn't go because why advertise it?”</p> <p>“...having people around you that are of a similar age...you don't feel...I don't know if it's threatened or whatever, but you just feel more at ease. You know?”</p> <p>“I need a place where I can talk about HIV”</p>                                                                                                                                                                                  | 12 | 21 | 3  |

1  
2  
3  
4  
5  
6  
7  
8  
9  
10  
11  
12  
13  
14  
15  
16  
17  
18  
19  
20  
21  
22  
23  
24  
25  
26  
27  
28  
29  
30  
31  
32  
33  
34  
35  
36  
37  
38  
39  
40  
41  
42  
43  
44  
45  
46  
47

|  |                            |                                                                                                                                                                                                                                                                                                                                                                                                                                                                                                              |    |    |    |
|--|----------------------------|--------------------------------------------------------------------------------------------------------------------------------------------------------------------------------------------------------------------------------------------------------------------------------------------------------------------------------------------------------------------------------------------------------------------------------------------------------------------------------------------------------------|----|----|----|
|  | Interpersonal interactions | <p>“Yeah. Yeah. Again, the gym is not going to miss you, if you don't show up. But if you've got a buddy, he might give you a call and go where the hell are you?”</p> <p>“And I think that there is a social aspect to it. I don't like competition with other people. But I like being around other people and sharing the same kind of things that they do.”</p> <p>“Yeah. A little check in with people. How are you doing? How's your work out? And just whatever conversation it is. I like that.”</p> | 40 | 25 | 11 |
|--|----------------------------|--------------------------------------------------------------------------------------------------------------------------------------------------------------------------------------------------------------------------------------------------------------------------------------------------------------------------------------------------------------------------------------------------------------------------------------------------------------------------------------------------------------|----|----|----|

For peer review only

# Reporting checklist for qualitative study.

Based on the SRQR guidelines.

## Instructions to authors

Complete this checklist by entering the page numbers from your manuscript where readers will find each of the items listed below.

Your article may not currently address all the items on the checklist. Please modify your text to include the missing information. If you are certain that an item does not apply, please write "n/a" and provide a short explanation.

Upload your completed checklist as an extra file when you submit to a journal.

In your methods section, say that you used the SRQR reporting guidelines, and cite them as:

O'Brien BC, Harris IB, Beckman TJ, Reed DA, Cook DA. Standards for reporting qualitative research: a synthesis of recommendations. *Acad Med.* 2014;89(9):1245-1251.

|                                            | Reporting Item                                                                                                                                                                                                                                          | Page Number |
|--------------------------------------------|---------------------------------------------------------------------------------------------------------------------------------------------------------------------------------------------------------------------------------------------------------|-------------|
|                                            | <a href="#">#1</a> Concise description of the nature and topic of the study identifying the study as qualitative or indicating the approach (e.g. ethnography, grounded theory) or data collection methods (e.g. interview, focus group) is recommended | 5-7         |
|                                            | <a href="#">#2</a> Summary of the key elements of the study using the abstract format of the intended publication; typically includes background, purpose, methods, results and conclusions                                                             | 3-4         |
| Problem formulation                        | <a href="#">#3</a> Description and significance of the problem / phenomenon studied: review of relevant theory and empirical work; problem statement                                                                                                    | 5-6         |
| Purpose or research question               | <a href="#">#4</a> Purpose of the study and specific objectives or questions                                                                                                                                                                            | 6           |
| Qualitative approach and research paradigm | <a href="#">#5</a> Qualitative approach (e.g. ethnography, grounded theory, case study, phenomenology, narrative research) and                                                                                                                          | 7           |

guiding theory if appropriate; identifying the research paradigm (e.g. postpositivist, constructivist / interpretivist) is also recommended; rationale. The rationale should briefly discuss the justification for choosing that theory, approach, method or technique rather than other options available; the assumptions and limitations implicit in those choices and how those choices influence study conclusions and transferability. As appropriate the rationale for several items might be discussed together.

|    |                           |                                                                                                                                                                                                                                                                                                                                                      |          |
|----|---------------------------|------------------------------------------------------------------------------------------------------------------------------------------------------------------------------------------------------------------------------------------------------------------------------------------------------------------------------------------------------|----------|
| 1  |                           |                                                                                                                                                                                                                                                                                                                                                      |          |
| 2  |                           |                                                                                                                                                                                                                                                                                                                                                      |          |
| 3  |                           |                                                                                                                                                                                                                                                                                                                                                      |          |
| 4  |                           |                                                                                                                                                                                                                                                                                                                                                      |          |
| 5  |                           |                                                                                                                                                                                                                                                                                                                                                      |          |
| 6  |                           |                                                                                                                                                                                                                                                                                                                                                      |          |
| 7  |                           |                                                                                                                                                                                                                                                                                                                                                      |          |
| 8  |                           |                                                                                                                                                                                                                                                                                                                                                      |          |
| 9  |                           |                                                                                                                                                                                                                                                                                                                                                      |          |
| 10 |                           |                                                                                                                                                                                                                                                                                                                                                      |          |
| 11 |                           |                                                                                                                                                                                                                                                                                                                                                      |          |
| 12 |                           |                                                                                                                                                                                                                                                                                                                                                      |          |
| 13 |                           |                                                                                                                                                                                                                                                                                                                                                      |          |
| 14 | Researcher                | <a href="#">#6</a>                                                                                                                                                                                                                                                                                                                                   | 6        |
| 15 | characteristics and       |                                                                                                                                                                                                                                                                                                                                                      |          |
| 16 | reflexivity               | Researchers' characteristics that may influence the research, including personal attributes, qualifications / experience, relationship with participants, assumptions and / or presuppositions; potential or actual interaction between researchers' characteristics and the research questions, approach, methods, results and / or transferability |          |
| 17 |                           |                                                                                                                                                                                                                                                                                                                                                      |          |
| 18 |                           |                                                                                                                                                                                                                                                                                                                                                      |          |
| 19 |                           |                                                                                                                                                                                                                                                                                                                                                      |          |
| 20 |                           |                                                                                                                                                                                                                                                                                                                                                      |          |
| 21 |                           |                                                                                                                                                                                                                                                                                                                                                      |          |
| 22 |                           |                                                                                                                                                                                                                                                                                                                                                      |          |
| 23 |                           |                                                                                                                                                                                                                                                                                                                                                      |          |
| 24 |                           |                                                                                                                                                                                                                                                                                                                                                      |          |
| 25 | Context                   | <a href="#">#7</a>                                                                                                                                                                                                                                                                                                                                   |          |
| 26 |                           | Setting / site and salient contextual factors; rationale                                                                                                                                                                                                                                                                                             |          |
| 27 |                           |                                                                                                                                                                                                                                                                                                                                                      |          |
| 28 | Sampling strategy         | <a href="#">#8</a>                                                                                                                                                                                                                                                                                                                                   | 6        |
| 29 |                           | How and why research participants, documents, or events were selected; criteria for deciding when no further sampling was necessary (e.g. sampling saturation); rationale                                                                                                                                                                            |          |
| 30 |                           |                                                                                                                                                                                                                                                                                                                                                      |          |
| 31 |                           |                                                                                                                                                                                                                                                                                                                                                      |          |
| 32 |                           |                                                                                                                                                                                                                                                                                                                                                      |          |
| 33 |                           |                                                                                                                                                                                                                                                                                                                                                      |          |
| 34 |                           |                                                                                                                                                                                                                                                                                                                                                      |          |
| 35 | Ethical issues pertaining | <a href="#">#9</a>                                                                                                                                                                                                                                                                                                                                   | 6        |
| 36 | to human subjects         | Documentation of approval by an appropriate ethics review board and participant consent, or explanation for lack thereof; other confidentiality and data security issues                                                                                                                                                                             |          |
| 37 |                           |                                                                                                                                                                                                                                                                                                                                                      |          |
| 38 |                           |                                                                                                                                                                                                                                                                                                                                                      |          |
| 39 |                           |                                                                                                                                                                                                                                                                                                                                                      |          |
| 40 | Data collection methods   | <a href="#">#10</a>                                                                                                                                                                                                                                                                                                                                  | 6        |
| 41 |                           | Types of data collected; details of data collection procedures including (as appropriate) start and stop dates of data collection and analysis, iterative process, triangulation of sources / methods, and modification of procedures in response to evolving study findings; rationale                                                              |          |
| 42 |                           |                                                                                                                                                                                                                                                                                                                                                      |          |
| 43 |                           |                                                                                                                                                                                                                                                                                                                                                      |          |
| 44 |                           |                                                                                                                                                                                                                                                                                                                                                      |          |
| 45 |                           |                                                                                                                                                                                                                                                                                                                                                      |          |
| 46 |                           |                                                                                                                                                                                                                                                                                                                                                      |          |
| 47 |                           |                                                                                                                                                                                                                                                                                                                                                      |          |
| 48 |                           |                                                                                                                                                                                                                                                                                                                                                      |          |
| 49 |                           |                                                                                                                                                                                                                                                                                                                                                      |          |
| 50 | Data collection           | <a href="#">#11</a>                                                                                                                                                                                                                                                                                                                                  | 6-7      |
| 51 | instruments and           | Description of instruments (e.g. interview guides, questionnaires) and devices (e.g. audio recorders) used for data collection; if / how the instruments(s) changed over the course of the study                                                                                                                                                     |          |
| 52 | technologies              |                                                                                                                                                                                                                                                                                                                                                      |          |
| 53 |                           |                                                                                                                                                                                                                                                                                                                                                      |          |
| 54 |                           |                                                                                                                                                                                                                                                                                                                                                      |          |
| 55 |                           |                                                                                                                                                                                                                                                                                                                                                      |          |
| 56 |                           |                                                                                                                                                                                                                                                                                                                                                      |          |
| 57 | Units of study            | <a href="#">#12</a>                                                                                                                                                                                                                                                                                                                                  | 8, table |
| 58 |                           | Number and relevant characteristics of participants, documents, or events included in the study; level of                                                                                                                                                                                                                                            | 1        |
| 59 |                           |                                                                                                                                                                                                                                                                                                                                                      |          |
| 60 |                           |                                                                                                                                                                                                                                                                                                                                                      |          |

participation (could be reported in results)

|    |                              |                     |      |
|----|------------------------------|---------------------|------|
| 1  |                              |                     |      |
| 2  |                              |                     |      |
| 3  | Data processing              | <a href="#">#13</a> | 6-7  |
| 4  |                              |                     |      |
| 5  |                              |                     |      |
| 6  |                              |                     |      |
| 7  |                              |                     |      |
| 8  |                              |                     |      |
| 9  | Data analysis                | <a href="#">#14</a> | 6-7  |
| 10 |                              |                     |      |
| 11 |                              |                     |      |
| 12 |                              |                     |      |
| 13 |                              |                     |      |
| 14 |                              |                     |      |
| 15 |                              |                     |      |
| 16 | Techniques to enhance        | <a href="#">#15</a> | 7    |
| 17 | trustworthiness              |                     |      |
| 18 |                              |                     |      |
| 19 |                              |                     |      |
| 20 |                              |                     |      |
| 21 | Syntheses and                | <a href="#">#16</a> | 8-12 |
| 22 | interpretation               |                     |      |
| 23 |                              |                     |      |
| 24 |                              |                     |      |
| 25 |                              |                     |      |
| 26 |                              |                     |      |
| 27 | Links to empirical data      | <a href="#">#17</a> | 8-12 |
| 28 |                              |                     |      |
| 29 |                              |                     |      |
| 30 |                              |                     |      |
| 31 | Intergration with prior      | <a href="#">#18</a> | 13   |
| 32 | work, implications,          |                     |      |
| 33 | transferability and          |                     |      |
| 34 | contribution(s) to the field |                     |      |
| 35 |                              |                     |      |
| 36 |                              |                     |      |
| 37 |                              |                     |      |
| 38 |                              |                     |      |
| 39 |                              |                     |      |
| 40 | Limitations                  | <a href="#">#19</a> | 16   |
| 41 |                              |                     |      |
| 42 |                              |                     |      |
| 43 | Conflicts of interest        | <a href="#">#20</a> | 7    |
| 44 |                              |                     |      |
| 45 |                              |                     |      |
| 46 |                              |                     |      |
| 47 |                              |                     |      |
| 48 | Funding                      | <a href="#">#21</a> | 17   |
| 49 |                              |                     |      |
| 50 |                              |                     |      |

The SRQR checklist is distributed with permission of Wolters Kluwer © 2014 by the Association of American Medical Colleges. This checklist can be completed online using <https://www.goodreports.org/>, a tool made by the [EQUATOR Network](#) in collaboration with [Penelope.ai](#)

# BMJ Open

## A Qualitative Focus Group Study of Perceived Barriers and Benefits to Exercise by Self-Described Exercise Status among Older Adults Living with HIV

|                                 |                                                                                                                                                                                                                                                                                                                                                                                                    |
|---------------------------------|----------------------------------------------------------------------------------------------------------------------------------------------------------------------------------------------------------------------------------------------------------------------------------------------------------------------------------------------------------------------------------------------------|
| Journal:                        | <i>BMJ Open</i>                                                                                                                                                                                                                                                                                                                                                                                    |
| Manuscript ID                   | bmjopen-2018-026294.R2                                                                                                                                                                                                                                                                                                                                                                             |
| Article Type:                   | Research                                                                                                                                                                                                                                                                                                                                                                                           |
| Date Submitted by the Author:   | 03-Jan-2019                                                                                                                                                                                                                                                                                                                                                                                        |
| Complete List of Authors:       | Johs, Nikolas; University of Colorado, School of Medicine<br>Kellar-Guenther, Yvonne; Center for Public Health Innovation, CI<br>International; University of Colorado, School of Public Health<br>Jankowski , Catherine M. ; University of Colorado, College of Nursing<br>Neff, Hadlai; University of Colorado, School of Public Health<br>Erlandson, Kristine; University of Colorado, Medicine |
| <b>Primary Subject Heading</b>: | HIV/AIDS                                                                                                                                                                                                                                                                                                                                                                                           |
| Secondary Subject Heading:      | Public health, Qualitative research, Sports and exercise medicine                                                                                                                                                                                                                                                                                                                                  |
| Keywords:                       | HIV & AIDS < INFECTIOUS DISEASES, GERIATRIC MEDICINE, PUBLIC HEALTH                                                                                                                                                                                                                                                                                                                                |
|                                 |                                                                                                                                                                                                                                                                                                                                                                                                    |

SCHOLARONE™  
Manuscripts

1  
2  
3 **A Qualitative Focus Group Study of Perceived Barriers and Benefits to Exercise by Self-**  
4 **Described Exercise Status among Older Adults Living with HIV**  
5  
6  
7

8  
9 Nikolas A. Johs<sup>1</sup>, Yvonne Kellar-Guenther<sup>2,3</sup>, Catherine M. Jankowski<sup>4</sup>, Hadlai Neff<sup>3</sup>, Kristine M.  
10 Erlandson<sup>5</sup>  
11

- 12  
13  
14 1. University of Colorado-Anschutz Medical Campus, School of Medicine, Aurora, CO  
15 2. Center for Public Health Innovation, CI International, Littleton, CO  
16 3. University of Colorado-Anschutz Medical Campus, School of Public Health, Aurora, CO  
17 4. University of Colorado-Anschutz Medical Campus, College of Nursing, Aurora, CO  
18 5. University of Colorado-Anschutz Medical Campus, Department of Medicine, Divisions of  
19 Infectious Diseases and Geriatric Medicine, Aurora, CO  
20

21 *Corresponding Author:*

22 Kristine M. Erlandson, MD MS

23 12700 E 19<sup>th</sup> Ave; Mail Stop B168

24 Aurora, CO 80045

25 (p) 303-724-4941; (f) 303-724-4926

26 [Kristine.Erlandson@ucdenver.edu](mailto:Kristine.Erlandson@ucdenver.edu)  
27  
28  
29  
30  
31  
32  
33

34 Word Count:

35 Abstract 286

36 Manuscript 3990  
37  
38

39 Running Head: Barriers and Benefits to Exercise in HIV

40 Key word: physical activity, exercise, aging, HIV, qualitative  
41  
42  
43  
44  
45  
46  
47  
48  
49  
50  
51  
52  
53  
54  
55  
56  
57  
58  
59  
60



## Abstract

**Objectives:** Although exercise interventions have been shown to improve health outcomes among older people with HIV (PLWH), this population remains highly sedentary. The purpose of this study was to examine the differences in perceived barriers and benefits to exercise among older PLWH by self-identified exercise status.

**Design:** Five focus groups were conducted among PLWH: two groups of exercising men, two groups of non-exercising men, and one group of women (mixed exercisers and non-exercisers). Themes were analyzed in relation to the social ecological model (SEM), utilizing the constant comparative approach.

**Setting:** Patients were recruited from an academic medical center HIV clinic and community locations.

**Participants:** PLWH aged 50 or older, diagnosed with HIV for at least two years, with no other health conditions that would preclude exercise.

**Primary and Secondary Outcome Measures:** Determine facilitators, barriers, and ideal environment for exercise or physical activity and whether these differ between older PLWH who self-identify as an exerciser or non-exerciser.

**Results:** Among 25 men (11 exercisers and 14 non-exercisers) and 4 women (3 non-exercisers and 1 exerciser), non-exercisers mentioned fewer benefits to exercise (n=46) than exercisers (n=75). Exercisers emphasized positive reinforcement, positive mood change and increased energy as benefits of exercise; interpersonal benefits of exercise were also discussed twice as often for exercisers than non-exercisers. Non-exercisers emphasized barriers to exercise including lack of motivation, lack of self-efficacy, and a negative perception of gym culture. Non-exercisers identified a need for age-appropriate activities as a feature of an ideal exercise

1  
2  
3 environment. Both groups identified time, cost, and health-related challenges as barriers to  
4  
5 exercise.  
6  
7

8 **Conclusions:** Unique exercise barriers and benefits by self-identified exercise status provide  
9  
10 important insights into the design of future interventions to initiate and maintain exercise.  
11  
12  
13  
14  
15  
16  
17  
18  
19  
20  
21  
22  
23  
24  
25  
26  
27  
28  
29  
30  
31  
32  
33  
34  
35  
36  
37  
38  
39  
40  
41  
42  
43  
44  
45  
46  
47  
48  
49  
50  
51  
52  
53  
54  
55  
56  
57  
58  
59  
60

## Article Summary

### Strengths and Limitations of This Study:

- We explored the perspectives of older men living with HIV on exercise among those with and without established exercise habits, which has not previously been reported in the literature
- This qualitative codebook was created in two phases. First transcripts were read and coders created an initial coding scheme based on the patterns seen on first pass-through. Additional codes were then developed from prior focus groups in this population as well as themes from the literature and added prior to analysis.
- All coding was done by hand by individual investigators, and all codes were reviewed by a third team member until a group consensus was reached
- Results of the analysis were shared with members of the community advisory board for further validation of the data
- Due to difficulty in recruiting women, data saturation of themes was not reached in this group and was only peripherally used to inform interpretation of the data

## Introduction:

With the advent of highly active antiretroviral therapy, nearly half of people living with HIV (PLWH) now are over 50 years old, and this number is expected to increase to 70% by 2030<sup>1</sup>. Higher rates of age-associated comorbidities among older PLWH, such as cardiovascular disease, osteoporosis, and neurocognitive disorders<sup>2</sup>, are likely due in part to chronic inflammation, seen with even suppressed HIV<sup>3</sup>. Furthermore, older adults with HIV often face higher rates of depression, social isolation, and the impact of both age-related and HIV-related stigma, which contribute to health disparities<sup>4-6</sup>. Exercise or physical activity appears to be a safe and effective way to prevent negative health outcomes associated with comorbidities in older PLWH<sup>7-14</sup>. Exercise interventions have been shown to improve cardiovascular fitness, bone mineral density, body composition, functional status, neurocognitive function, and health-related quality of life in PLWH,<sup>15-18</sup> and exercise is recommended for older PLWH<sup>19</sup>. Despite the importance of physical activity and exercise to health among older PLWH, high rates of sedentary behavior are common<sup>20 21</sup>.

The factors that drive health behaviors in a population are often described through the social ecological model (SEM). The SEM posits that health behavior is influenced by a number of personal, social, organizational, community, and policy level factors that interact, and cannot be fully understood or enacted upon without addressing all potential levels of influence<sup>22 23</sup>. Indeed, the SEM model has been used extensively in the exercise health behavior literature to investigate the many competing factors that influence physical activity<sup>24-27</sup>. Similarly, a number of qualitative studies have explored attitudes towards exercise or physical activity among diverse populations of PLWH and have identified factors influencing exercise or routine physical activity, such as physical health and self-efficacy (personal), social support and competing priorities such as caregiver responsibilities (social), and accessibility of safe environments for exercise (community)<sup>28-33</sup>. However, these studies did not distinguish the viewpoints of participants with, and without, established exercise habits. Thus, the focus of this qualitative

1  
2  
3 study was to explore whether the facilitators, barriers, and ideal environment for exercise or  
4 physical activity differ between older PLWH who self-identify as an exerciser compared to a  
5 non-exerciser, with the hypothesis that many factors directly influencing exercise behavior  
6 would span the SEM levels. Identification of the key differences influencing behavior between  
7 PLWH who do and do not exercise will inform multi-level interventions to most effectively  
8 transition non-exercisers into self-identified exercisers.  
9  
10  
11  
12  
13  
14  
15  
16  
17

### 18 **Methods:**

19  
20 Participants were recruited from a University-based HIV primary care clinic and from local HIV  
21 community groups. Eligible participants were diagnosed with HIV for  $\geq 2$  years, aged  $\geq 50$  years,  
22 regularly seeing a physician for HIV care, and taking antiretroviral therapy for  $\geq 6$  months.  
23  
24 Exclusion criteria included inability to provide consent, inability to speak English, or inability to  
25 participate in *any* form of exercise. Participants self-identified exercise behavior in response to  
26 the question, “are you currently exercising regularly, meaning more than 2 days per week, on  
27 most weeks?”. All participants provided written informed consent. The study was approved by  
28 the Colorado Multi-Institutional Review Board and was registered on Clinical Trials.gov  
29 (NCT02404792).  
30  
31  
32  
33  
34  
35  
36  
37  
38

39 Five focus groups were conducted in June 2016 including: two groups of men that self-  
40 identified as exercisers; two groups of men that self-identified as non-exercisers; and a group of  
41 women (both exercisers and non-exercisers,  $n=4$ ). The focus groups took place in a private  
42 conference room in an outpatient medical facility located near the clinic where the majority of  
43 participants obtained care. All five focus groups were conducted by a physician who works in  
44 the HIV primary care clinic (KME); four of the participants were patients of the physician  
45 conducting the focus group. Notes were taken by a second investigator with no treatment  
46 relationship to the participants (NAJ). Participants completed a short demographic survey prior  
47 to the focus group session. Each session lasted approximately two hours. A semi-structured  
48  
49  
50  
51  
52  
53  
54  
55  
56  
57  
58  
59  
60

1  
2  
3 guide of open-ended questions informed by the literature and prior work by our group<sup>34</sup> was  
4 used to facilitate the discussion. All focus groups were audio-recorded and transcribed verbatim  
5 by a transcriptionist not involved in the study. Participants were provided with a \$20 gift card  
6 after completion of the focus group.  
7  
8  
9  
10

11 The transcripts were analyzed individually by two members of the study team involved in  
12 the focus groups, and another team member who was not involved. First, rather than starting  
13 with a theory like SEM, the team created a codebook in two phases. First transcripts were read  
14 and coders created an initial coding scheme based on the patterns seen on first pass-through.  
15 Codes were then added using a deductive approach with a list of key domains developed from a  
16 prior set of focus groups (in PLWH), as well as prior literature for exercise barriers in older  
17 adults and PLWH<sup>34</sup>. New codes identified during the analysis were added to the coding scheme  
18 and, utilizing a constant-comparison approach, the early transcripts were reanalyzed after the  
19 final codebook was determined.  
20  
21  
22  
23  
24  
25  
26  
27  
28  
29

30 Coding and analyses were completed by hand, independently by each investigator, and  
31 then codes were compared; differences were resolved by group consensus. Categories were  
32 structured by benefits and motivators to exercise, barriers to exercise, ideal conditions for  
33 exercise, and other. These categories were then analyzed and compared between the self-  
34 identified exercisers and non-exercisers. In the results, it was noted when a code was  
35 mentioned by all four focus groups or by both focus groups of each type (exercisers or non-  
36 exercisers). Codes that were unique to only one type (exercisers or non-exercisers) were then  
37 compared to the literature to determine if saturation was reached. Challenges with recruitment  
38 of women to the study did not allow for subdivision into self-identified exercisers and non-  
39 exercisers, and because data saturation could not be reached, themes from this group were  
40 used to support findings of the other groups. Quotes from the interviews are provided for insight  
41 into the identified themes.  
42  
43  
44  
45  
46  
47  
48  
49  
50  
51  
52  
53  
54  
55  
56  
57  
58  
59  
60

### *Patient and Public Involvement:*

Member checking involved review and discussion of the results with seven men who are part of our community advisory group. These men reflect characteristics of the focus group participants and provided input as to whether the focus group results resonated with their experiences.

### **Results:**

Twenty-nine participants (Table 1) from 5 focus groups included 11 men who self-identified as exercisers (focus groups n=6, n=5), 14 men who self-identified as non-exercisers (focus groups n=8, n=6), and 4 women. Briefly, among the men, the median age was 57 years, the majority were white and college-educated men who have sex with men. The women had a median age of 56 years, the majority having some college education and sexual preference of men. Male participants had been living with HIV for approximately 20 years (range of 4 to 33 years), and female participants for 15 years (range 4 to 27 years).

### **Motivators to and Benefits of Exercise**

A variety of motivators to exercise and benefits of exercise were reported by both exercising and non-exercising groups although, overall, non-exercisers mentioned far fewer benefits to exercise (n=46 mentions) than exercisers (n=75 mentions), Table 2. A shared theme was the benefit of being able to think more clearly, or a sense of self-reflection or meditation. For the exercisers, this was more often related to feeling mindful during exercise, “swimming is something like putting yourself in a meditative state. Which is relaxing and you know...it gives me a chance just to zone out by myself.” For the non-exercising group, they talked about how physical activity helped them to think more clearly, “...there is a physiological and mental aspect to it that is very refreshing. It [exercising] is good for your soul... It clears your mind”. Exercisers perceived a benefit on mood, mental health, and coping with stress. As one participant

1  
2  
3 mentioned, "I was diagnosed bipolar about 18 years ago. And so I use exercise as a coping  
4 mechanism for when I'm depressed or when I'm manic...It grounds me". Exercise also helped to  
5 combat the effects of aging: "Well, I'm 60 and I didn't want anything headed south on me!".  
6  
7

8  
9 The social aspects of exercise were recognized more commonly than the personal  
10 benefits in all groups, and nearly twice as often among exercisers: "...having a friend or a  
11 buddy to exercise with is a great motivator" (exerciser). Exercisers placed more importance on  
12 the motivating encouragement or positive reinforcement from family or peers: "Especially like  
13 people at church who I see every Sunday and they are like, keep doing it. Keep going. Keep  
14 going. You look great. But that positive reinforcement you know, building my self-esteem a little  
15 bit more and you know, remembering that makes me want to walk that half mile ...Cause then I  
16 know it's paying off" (exerciser). Non-exercisers reported the influence of the social  
17 environment or the community on motivation to start exercise. For example, one participant  
18 mentioned how much more motivated he was to be active when his community was more  
19 active, "not everybody can live in the mountain towns [more physically active towns] and they  
20 don't want to. But anyway I had a great network of friends up there. Socially and sports-wise"  
21 (non-exerciser). Additional motivators and benefits are detailed in Table 2.  
22  
23  
24  
25  
26  
27  
28  
29  
30  
31  
32  
33  
34  
35  
36  
37  
38

### 39 **Barriers to Exercise**

40  
41 Physical health, fatigue, injuries or hospitalizations were mentioned among both groups,  
42 but more commonly identified as barriers among non-exercisers. One patient related the  
43 physical health barriers following a hospitalization: "I ended up being in the hospital for a week  
44 with septic shock...up until that time, I was 100% fine...and then the next thing I know, I'm in the  
45 ICU and obviously after a week in the hospital, I was much weaker. But when I came home it  
46 was like wait, why am I getting winded? So my mind said I should be able to continue doing  
47 things at the level I was before. But my body wasn't doing that" (non-exerciser). Other themes  
48 discussed by both groups included having a lack of time ("work is just really an impediment",  
49  
50  
51  
52  
53  
54  
55  
56  
57  
58  
59  
60



1  
2  
3 non-exerciser), depression, and loss of a personal relationship (“when he left me, it zapped  
4 everything”; non-exerciser).  
5  
6

7 Prominent barriers discussed almost exclusively by the non-exercising group included:  
8  
9 a lack of motivation or discipline, lack of a daily routine, or difficulty related to fatigue or other life  
10 struggles; “Sometimes it takes everything I have to get out of bed in the morning”. Poor exercise  
11 self-efficacy was also more commonly discussed among non-exercisers than exercisers. One  
12 participant described a strong desire to be active for health reasons, but faced challenges to  
13 establishing a regular workout routine, “But the motivation to believe in myself and to have the  
14 ability to know that I can do it again, would probably be the hardest part for me.” This also  
15 coincided with a lack of familiarity of exercise or lack of knowledge of newer technology, “First of  
16 all, there are technological advances that have happened since I spent any time in a gym. And I  
17 think...that when it comes to being inside a gym or something, I don’t know what the best order  
18 of machines would be. Or what is going to work for you.” Age-related barriers further contributed  
19 to low exercise self-efficacy. When one participant asked the group if he was the only one that  
20 felt fatigue, another replied, “I don't have a bundle of energy. I'm not bouncing off the walls, you  
21 know? Twenty years ago, I used to bounce off the walls 'cause I had so much [energy]...”. One  
22 group particularly bemoaned a lack of age-appropriate activities at gyms: “...they are not going  
23 to be able to fine-tune something that is more appropriate for someone my age or with various  
24 health issues and things like that.”  
25  
26  
27  
28  
29  
30  
31  
32  
33  
34  
35  
36  
37  
38  
39  
40  
41  
42

43 Uniquely identified in the non-exercising groups was a negative perception of gym  
44 culture. Participants expressed disdain for younger gym members who were perceived to be  
45 more focused on their looks than health (“posers” was the term used by one participant) and for  
46 the general environment: “Another thing that really turned me off was during a couple decades  
47 period of time, the gym culture changed dramatically from just being a work-out place, to being  
48 these entertainment centers with pounding music and all this fancy gym clothes...one day I just  
49 walked in and the music was pounding and I said, you know, you got all these frickin’ queens  
50  
51  
52  
53  
54  
55  
56  
57  
58  
59  
60

1  
2  
3 posing like peacocks in the mirrors and I've had it." The gym was also perceived as a business  
4 more focused on selling a product than health, "I don't think they are interested in my health as  
5 much as they are trying to sell themselves and make money. I don't like that at all. Because  
6 they are not interested in me". In contrast to these negative perceptions expressed by non-  
7 exercisers, exercisers commented more on the aspects of community within the gym that they  
8 enjoyed.  
9  
10  
11  
12  
13  
14

15  
16 Exercisers noted a lack of social support as a barrier to exercise. When talking about a  
17 time period prior to being an exerciser, a participant related, "I had never lived for me. It was  
18 always about my partner or my parents or my teachers, or my friends. My whole life - 50 years -  
19 had revolved around what somebody else wanted for me." Another expression of this theme  
20 was related to simply not having a social group with which to participate in activity, "...Before my  
21 partner passed away, we used to like to go up in the mountains and go hiking. But right now it is  
22 like...I don't know anybody around here that enjoys doing it. So this summer I haven't gone  
23 hiking at all. I take [my dog] out for his walks. But it's like...I just, you know...I don't know  
24 anybody to go hiking with so...".  
25  
26  
27  
28  
29  
30  
31  
32  
33  
34  
35  
36

### 37 **Ideal Environment for Exercise**

38  
39 When participants were asked to describe ideal exercise conditions, many of the  
40 answers related back to the motivators and barriers (Table 2). For both groups, cost and access  
41 were important factors. Multiple groups mentioned benefits of the insurance-sponsored  
42 programs or reduced-cost community centers, or expressed intentions of investigating such  
43 programs. Type of exercise was also related to cost for some participants, "I actually kind of  
44 enjoy going out for a run. It doesn't cost me anything. It's free" (exerciser). Interpersonal and  
45 social factors were important factors for both groups, with every group describing an aspect of  
46 the social environment that they thought was important, whether an "exercise buddy" or a  
47  
48  
49  
50  
51  
52  
53  
54  
55  
56  
57  
58  
59  
60

1  
2  
3 welcoming environment: “If someone was genuinely interested in working with me and when I  
4 say, generally interested in it from a social perspective. You know?” (non-exerciser).  
5  
6

7 We also posed the question of what would be the preferred exercise community.  
8  
9 Opinions differed across groups: some felt that they would appreciate having a gym that  
10 catered to PLWH exclusively whereas others were opposed to this idea. Non-exercisers  
11 preferred a gym or program that catered to older adults: “...having people around you that are of  
12 a similar age. You know? You don't feel ...I don't know if it's threatened or whatever, but you  
13 just feel more at ease. You know?” Non-exercisers were also more interested in the types of  
14 activities available at the gym and the facilities, and in particular, mentioned the importance of  
15 having age-appropriate activities. When describing an acceptable gym format, one participant  
16 stated, “what I liked about [the gym]... all the machines are in a circle and it's just for seniors”.  
17  
18 This group also mentioned dedicated instruction as something that would be a part of their ideal  
19 gym, or clear instructions that would help them to get started if they were not familiar with a  
20 given exercise.  
21  
22  
23  
24  
25  
26  
27  
28  
29  
30  
31  
32  
33  
34  
35  
36

### 37 **Other Factors Acting As Barriers to Exercise or Physical Activity**

38  
39 Throughout the discussion of physical activity and exercise, many other factors were  
40 acknowledged, though not directly in the context of exercise or physical activity. These topics  
41 related to life challenges that the participants faced, including drug abuse, feeling unsafe in their  
42 neighborhood, lack of affordable housing, mental health issues, or stigma related to HIV, sexual  
43 preference, or age. Every group had unprompted discussion about social isolation, or loss of  
44 friends or partners due to HIV or other reasons, “Now that I'm older, I don't have any 'gay  
45 friends' anymore. And I wonder, is it me? Or have they gone somewhere? I mean a lot of them  
46 died...But like, I don't have any gay friends. My friends are accepting of me even they know I  
47  
48  
49  
50  
51  
52  
53  
54  
55  
56  
57  
58  
59  
60

1  
2  
3 am, but I don't have any. Do you all have any friends who are HIV positive?" This limited group  
4 of gay friends threatens the important social support motivator for exercise.  
5  
6  
7

## 8 9 **Discussion:**

10  
11 As the SEM is frequently used to inform the personal and societal factors that influence  
12 physical activity, we anticipated that our participants would identify the contribution of each level  
13 to their own exercise and physical activity behaviors<sup>22 25 26</sup>. We instead found that participants  
14 focused much more on the personal physical, mental, and social factors. While environment  
15 came up as a deterrent for non-exercisers (negative gym culture), policy was seldom  
16 recognized as an influence on physical activity. The most salient theme identified that may  
17 serve as an target for future policy-level changes would be access (cost and transportation) to a  
18 gym, which was identified as a barrier by both exercisers and non-exercisers. The lack of  
19 connection with the gay community was also mentioned, but participants did not directly connect  
20 that to physical activity. Furthermore, exercisers and non-exercisers recognized some similar,  
21 but also unique, barriers and facilitators to routine exercise or physical activity that are important  
22 to consider when designing lifestyle interventions for older PLWH.  
23  
24  
25  
26  
27  
28  
29  
30  
31  
32  
33  
34  
35  
36

37 Physical health was identified as both a major barrier and a motivating factor to exercise.  
38 The exercisers were more likely to mention the health-related benefits of exercise, report  
39 increased energy, and acknowledge the importance of exercise towards improving overall  
40 health, as has been reported previously in the general exercise literature<sup>26</sup>. Despite the  
41 medical advances of HIV management with antiretroviral therapy, older PLWH appear to  
42 experience age-associated comorbidities at a higher rate and at a younger age than the general  
43 population<sup>2 35</sup>. The physical barriers attributed to HIV and medications, generalized fatigue, or  
44 chronic pain by our participants are consistently identified as barriers to exercise among PLWH  
45  
46  
47  
48  
49  
50  
51  
52  
53  
54  
55  
56  
57  
58  
59  
60  
61  
62  
63  
64  
65  
66  
67  
68  
69  
70  
71  
72  
73  
74  
75  
76  
77  
78  
79  
80  
81  
82  
83  
84  
85  
86  
87  
88  
89  
90  
91  
92  
93  
94  
95  
96  
97  
98  
99  
100  
101  
102  
103  
104  
105  
106  
107  
108  
109  
110  
111  
112  
113  
114  
115  
116  
117  
118  
119  
120  
121  
122  
123  
124  
125  
126  
127  
128  
129  
130  
131  
132  
133  
134  
135  
136  
137  
138  
139  
140  
141  
142  
143  
144  
145  
146  
147  
148  
149  
150  
151  
152  
153  
154  
155  
156  
157  
158  
159  
160  
161  
162  
163  
164  
165  
166  
167  
168  
169  
170  
171  
172  
173  
174  
175  
176  
177  
178  
179  
180  
181  
182  
183  
184  
185  
186  
187  
188  
189  
190  
191  
192  
193  
194  
195  
196  
197  
198  
199  
200  
201  
202  
203  
204  
205  
206  
207  
208  
209  
210  
211  
212  
213  
214  
215  
216  
217  
218  
219  
220  
221  
222  
223  
224  
225  
226  
227  
228  
229  
230  
231  
232  
233  
234  
235  
236  
237  
238  
239  
240  
241  
242  
243  
244  
245  
246  
247  
248  
249  
250  
251  
252  
253  
254  
255  
256  
257  
258  
259  
260  
261  
262  
263  
264  
265  
266  
267  
268  
269  
270  
271  
272  
273  
274  
275  
276  
277  
278  
279  
280  
281  
282  
283  
284  
285  
286  
287  
288  
289  
290  
291  
292  
293  
294  
295  
296  
297  
298  
299  
300  
301  
302  
303  
304  
305  
306  
307  
308  
309  
310  
311  
312  
313  
314  
315  
316  
317  
318  
319  
320  
321  
322  
323  
324  
325  
326  
327  
328  
329  
330  
331  
332  
333  
334  
335  
336  
337  
338  
339  
340  
341  
342  
343  
344  
345  
346  
347  
348  
349  
350  
351  
352  
353  
354  
355  
356  
357  
358  
359  
360  
361  
362  
363  
364  
365  
366  
367  
368  
369  
370  
371  
372  
373  
374  
375  
376  
377  
378  
379  
380  
381  
382  
383  
384  
385  
386  
387  
388  
389  
390  
391  
392  
393  
394  
395  
396  
397  
398  
399  
400  
401  
402  
403  
404  
405  
406  
407  
408  
409  
410  
411  
412  
413  
414  
415  
416  
417  
418  
419  
420  
421  
422  
423  
424  
425  
426  
427  
428  
429  
430  
431  
432  
433  
434  
435  
436  
437  
438  
439  
440  
441  
442  
443  
444  
445  
446  
447  
448  
449  
450  
451  
452  
453  
454  
455  
456  
457  
458  
459  
460  
461  
462  
463  
464  
465  
466  
467  
468  
469  
470  
471  
472  
473  
474  
475  
476  
477  
478  
479  
480  
481  
482  
483  
484  
485  
486  
487  
488  
489  
490  
491  
492  
493  
494  
495  
496  
497  
498  
499  
500  
501  
502  
503  
504  
505  
506  
507  
508  
509  
510  
511  
512  
513  
514  
515  
516  
517  
518  
519  
520  
521  
522  
523  
524  
525  
526  
527  
528  
529  
530  
531  
532  
533  
534  
535  
536  
537  
538  
539  
540  
541  
542  
543  
544  
545  
546  
547  
548  
549  
550  
551  
552  
553  
554  
555  
556  
557  
558  
559  
560  
561  
562  
563  
564  
565  
566  
567  
568  
569  
570  
571  
572  
573  
574  
575  
576  
577  
578  
579  
580  
581  
582  
583  
584  
585  
586  
587  
588  
589  
590  
591  
592  
593  
594  
595  
596  
597  
598  
599  
600  
601  
602  
603  
604  
605  
606  
607  
608  
609  
610  
611  
612  
613  
614  
615  
616  
617  
618  
619  
620  
621  
622  
623  
624  
625  
626  
627  
628  
629  
630  
631  
632  
633  
634  
635  
636  
637  
638  
639  
640  
641  
642  
643  
644  
645  
646  
647  
648  
649  
650  
651  
652  
653  
654  
655  
656  
657  
658  
659  
660  
661  
662  
663  
664  
665  
666  
667  
668  
669  
670  
671  
672  
673  
674  
675  
676  
677  
678  
679  
680  
681  
682  
683  
684  
685  
686  
687  
688  
689  
690  
691  
692  
693  
694  
695  
696  
697  
698  
699  
700  
701  
702  
703  
704  
705  
706  
707  
708  
709  
710  
711  
712  
713  
714  
715  
716  
717  
718  
719  
720  
721  
722  
723  
724  
725  
726  
727  
728  
729  
730  
731  
732  
733  
734  
735  
736  
737  
738  
739  
740  
741  
742  
743  
744  
745  
746  
747  
748  
749  
750  
751  
752  
753  
754  
755  
756  
757  
758  
759  
760  
761  
762  
763  
764  
765  
766  
767  
768  
769  
770  
771  
772  
773  
774  
775  
776  
777  
778  
779  
780  
781  
782  
783  
784  
785  
786  
787  
788  
789  
790  
791  
792  
793  
794  
795  
796  
797  
798  
799  
800  
801  
802  
803  
804  
805  
806  
807  
808  
809  
810  
811  
812  
813  
814  
815  
816  
817  
818  
819  
820  
821  
822  
823  
824  
825  
826  
827  
828  
829  
830  
831  
832  
833  
834  
835  
836  
837  
838  
839  
840  
841  
842  
843  
844  
845  
846  
847  
848  
849  
850  
851  
852  
853  
854  
855  
856  
857  
858  
859  
860  
861  
862  
863  
864  
865  
866  
867  
868  
869  
870  
871  
872  
873  
874  
875  
876  
877  
878  
879  
880  
881  
882  
883  
884  
885  
886  
887  
888  
889  
890  
891  
892  
893  
894  
895  
896  
897  
898  
899  
900  
901  
902  
903  
904  
905  
906  
907  
908  
909  
910  
911  
912  
913  
914  
915  
916  
917  
918  
919  
920  
921  
922  
923  
924  
925  
926  
927  
928  
929  
930  
931  
932  
933  
934  
935  
936  
937  
938  
939  
940  
941  
942  
943  
944  
945  
946  
947  
948  
949  
950  
951  
952  
953  
954  
955  
956  
957  
958  
959  
960  
961  
962  
963  
964  
965  
966  
967  
968  
969  
970  
971  
972  
973  
974  
975  
976  
977  
978  
979  
980  
981  
982  
983  
984  
985  
986  
987  
988  
989  
990  
991  
992  
993  
994  
995  
996  
997  
998  
999  
1000

1  
2  
3 All groups discussed the impact of depression and loss in their exercise behaviors (or  
4 life) but the positive impact of exercise on mood and mental health was most often recognized  
5 by the exercisers. These results are consistent with a recent meta-analysis that found aerobic  
6 and resistance exercise interventions had positive effects on various domains of mental health  
7 such as stress, anxiety and depressive symptoms in PLWH<sup>37</sup>. In contrast, mental health-related  
8 barriers to physical activity are well-described among other populations of PLWH<sup>28 32 33</sup>, and  
9 depression has been correlated with decreased PA levels in both PLWH and in the general  
10 population<sup>26 38</sup>. Depression as a barrier to exercise is of particular relevance given that PLWH  
11 have up to three times the rate of depression as the general population<sup>5</sup>, and that perceived  
12 well-being may be associated with adherence to an exercise regimen<sup>39</sup>. Among the exercisers,  
13 the mental health benefits of exercise were an important factor in the maintenance of physical  
14 activity and thus is an important domain to emphasize in future exercise intervention studies.

15  
16  
17  
18  
19  
20  
21  
22  
23  
24  
25  
26  
27  
28 One of the more striking differences between exercisers and non-exercisers was related  
29 to a lack of exercise motivation and exercise self-efficacy among the non-exercisers. Self-  
30 efficacy has consistently been identified as one of strongest correlates of exercise behavior in  
31 adults in general<sup>25-27 40 41</sup> and PLWH<sup>38 39</sup>. Self-efficacy is commonly defined as an individual's  
32 confidence in their ability to complete a task or series of actions, in this case the ability to  
33 exercise safely and effectively. Self-efficacy may interact with motivation to exercise, such that  
34 an individual with poor exercise self-efficacy has poor recognition of exercise benefits, less  
35 confidence in exercise ability, and therefore, less motivation to initiate exercise<sup>42</sup>. The non-  
36 exercising group identified a number of themes related to poor self-efficacy including changing  
37 technology in gyms, older age, and poor health. Similarly, non-exercisers identified  
38 interventions that may help overcome the lack of self-efficacy, including access to specific  
39 instruction or wellness facilities that cater to older adults.

40  
41  
42  
43  
44  
45  
46  
47  
48  
49  
50  
51  
52  
53  
54 The social aspects of exercise or physical activity were strong motivators or benefits  
55 among both groups: Exercisers were more likely to mention encouragement from others as an  
56  
57  
58  
59  
60

1  
2  
3 important motivator, whereas non-exercisers focused on the general social environment, rather  
4 than the exercise-specific environment. Social isolation and a desire to connect with other social  
5 groups were discussed by all participants, though not directly in the context of exercise. The  
6 importance of social support in exercise has been described among PLWH, whether as a  
7 “workout buddy”, general community activities, or more social support in general <sup>28 29 32 33</sup>. Older  
8 PLWH have high rates of social isolation, and may have challenges related to loss of friends  
9 due to illness, or estrangement from family due to HIV or other stigma <sup>6 43</sup>. Social support has  
10 been associated with greater physical activity, and loneliness with decreased physical activity <sup>44</sup>.  
11 Effective physical activity initiation and maintenance among older PLWH may be strengthened  
12 by a robust social environment.  
13  
14  
15  
16  
17  
18  
19  
20  
21  
22  
23

24 A unique finding was the negative perception of gym culture, recognized to the greatest  
25 extent among non-exercisers. The younger community at a gym was perceived as non-  
26 welcoming, and participants instead desired a genuine community that connected with them as  
27 individuals rather than as a depersonalized customer. There was little consensus among our  
28 focus groups regarding what an ideal exercise or physically active community would look like,  
29 particularly among the non-exercising group. In our previous work among older men with HIV  
30 enrolled in an exercise intervention, participants discussed the appeal of a gym community for  
31 older PLWH<sup>34</sup>. Here, however, we found this concept to be contentious, some citing a desire for  
32 connection with similar others (older and/or with HIV), but others relating a desire for privacy  
33 and concerns about disclosure due to HIV stigma, noted as a barrier to exercise in prior studies  
34 of PLWH <sup>29 31</sup>. Based on the data from these focus groups, the welcoming environment of a new  
35 gym or activity may be particularly important to those not currently exercising, and activities  
36 targeted for older adults may be beneficial. Aside from gym culture, the role of organizational,  
37 community, and policy factors (access, cost, indirect barriers such as insecure housing and  
38 affordable food, and the built environment) were discussed but not dominant. These commonly  
39  
40  
41  
42  
43  
44  
45  
46  
47  
48  
49  
50  
51  
52  
53  
54  
55  
56  
57  
58  
59  
60

1  
2  
3 reported barriers to physical activity in the general population are a focus of public health and  
4 policy interventions <sup>24 26 27 45 46</sup>.

7 Our study has several limitations. The majority of our participants were white college-  
8 educated men, limiting the generalizability of our findings. Themes that were mentioned by the  
9 women's group that merit further exploration include the importance of health-related barriers to  
10 exercise and placing higher value on an active lifestyle as opposed to structured exercise.  
11 Additionally, our participants were self-identified as exercisers or non-exercisers with no  
12 objective verification of their actual amount of type of physical activity. While many of the  
13 themes our participants discussed are supported by the literature, ideas about barriers due to  
14 gym culture and business models has not been reported to our knowledge, and our focus  
15 groups may not have been sufficient to provide saturation on these specific topics. When these  
16 results were reported to our community advisory group, they agreed that many corporate gyms  
17 had an unfriendly environment, but that perhaps smaller recreation centers might have more of  
18 a welcoming atmosphere that our participants desired.  
19  
20  
21  
22  
23  
24  
25  
26  
27  
28  
29  
30  
31  
32  
33  
34

### 35 **Conclusions**

36  
37 In summary, inter- and intrapersonal factors, including an emphasis on social  
38 connection, were central to exercise behaviors among older adults with HIV whereas  
39 organizational, community, and policy level factors of the SEM were minor contributors. While  
40 addressing these higher-level SEM domains may be important for long-term and large-scale  
41 exercise and physical activity dissemination and maintenance, strategies to promote physical  
42 activity in older PLWH may need to focus on overcoming physical barriers and providing a safe  
43 and welcoming social environment.  
44  
45  
46  
47  
48  
49  
50  
51  
52  
53  
54  
55  
56  
57  
58  
59  
60

**Funding Statement:**

Funding: This research was funded through the National Institutes of Health, National Institute on Aging (K23 AG050260 to KME) and NCATS Colorado CTSA (UL1 TR002535). Contents are the authors' sole responsibility and do not necessarily represent official NIH views.

**Data Statement section:**

Although de-identified, transcribed data may provide personal information that could be linked to individual participants. Codebooks or sections of the transcripts that are not felt to be identifiable may be provided upon request of the corresponding author. Provision is dependent upon approval of the Institutional Review Board.

**Author Contributions:**

NAJ, HN, and KME developed the initial codebook, with input from CJM. KME led the interview sessions with additional input from NAJ and CJM. Data coding was completed by Sara Dunham (see below), NAJ, and KME, with input from CJM, YKG, and HN if consensus was not achieved. NAJ prepared the first manuscript draft; all authors contributed to, reviewed, and approved the final manuscript.

**Acknowledgements:**

Sarah Dunham, MPH also coded data.

**Competing Interests:**

KME has received funding for research paid to the University of Colorado from Gilead Sciences, and has received funding for advisory panel from Viiv Healthcare.



## References

1. Smit M, Brinkman K, Geerlings S, et al. Future challenges for clinical care of an ageing population infected with HIV: a modelling study. *The Lancet Infectious Diseases* 2015;15(7):810-18.
2. Deeks SG. HIV infection, inflammation, immunosenescence, and aging. *Annual review of medicine* 2011;62:141-55.
3. Castillo-Mancilla JR, Brown TT, Erlandson KM, et al. Suboptimal adherence to combination antiretroviral therapy is associated with higher levels of inflammation despite HIV suppression. *Clinical Infectious Diseases* 2016:ciw650.
4. Kaufman MR, Cornish F, Zimmerman RS, et al. Health Behavior Change Models for HIV Prevention and AIDS Care: Practical Recommendations for a Multi-Level Approach. *Journal of Acquired Immune Deficiency Syndromes (1999)* 2014;66(Suppl 3):S250-S58. doi: 10.1097/QAI.0000000000000236
5. Do AN, Rosenberg ES, Sullivan PS, et al. Excess burden of depression among HIV-infected persons receiving medical care in the United States: data from the medical monitoring project and the behavioral risk factor surveillance system. *PLoS One* 2014;9(3):e92842.
6. Emler CA. An examination of the social networks and social isolation in older and younger adults living with HIV/AIDS. *Health & social work* 2006;31(4):299-308.
7. Botros D, Somarriba G, Neri D, et al. Interventions to address chronic disease and HIV: strategies to promote exercise and nutrition among HIV-infected individuals. *Current HIV/AIDS Reports* 2012;9(4):351-63.
8. O'Brien KK, Tynan AM, Nixon SA, et al. Effectiveness of aerobic exercise for adults living with HIV: systematic review and meta-analysis using the Cochrane Collaboration protocol. *BMC Infect Dis* 2016;16:182. doi: 10.1186/s12879-016-1478-2 [published Online First: 2016/04/27]

- 1  
2  
3 9. O'Brien KK, Tynan AM, Nixon SA, et al. Effectiveness of Progressive Resistive Exercise  
4  
5 (PRE) in the context of HIV: systematic review and meta-analysis using the Cochrane  
6  
7 Collaboration protocol. *BMC Infect Dis* 2017;17(1):268. doi: 10.1186/s12879-017-2342-8  
8  
9 [published Online First: 2017/04/14]  
10
- 11  
12 10. Nixon S, O'Brien K, Glazier RH, et al. Aerobic exercise interventions for people with  
13  
14 HIV/AIDS. *The Cochrane database of systematic reviews* 2001(1):Cd001796. doi:  
15  
16 10.1002/14651858.Cd001796 [published Online First: 2001/05/02]  
17
- 18  
19 11. Nixon S, O'Brien K, Glazier RH, et al. Aerobic exercise interventions for adults living with  
20  
21 HIV/AIDS. *The Cochrane database of systematic reviews* 2002(2):Cd001796. doi:  
22  
23 10.1002/14651858.Cd001796 [published Online First: 2002/06/22]  
24
- 25  
26 12. O'Brien K, Nixon S, Glazier RH, et al. Progressive resistive exercise interventions for adults  
27  
28 living with HIV/AIDS. *The Cochrane database of systematic reviews* 2004(4):Cd004248.  
29  
30 doi: 10.1002/14651858.CD004248.pub2 [published Online First: 2004/10/21]  
31
- 32  
33 13. Nixon S, O'Brien K, Glazier RH, et al. Aerobic exercise interventions for adults living with  
34  
35 HIV/AIDS. *The Cochrane database of systematic reviews* 2005(2):Cd001796. doi:  
36  
37 10.1002/14651858.CD001796.pub2 [published Online First: 2005/04/23]  
38
- 39  
40 14. O'Brien K, Nixon S, Tynan AM, et al. Aerobic exercise interventions for adults living with  
41  
42 HIV/AIDS. *The Cochrane database of systematic reviews* 2010(8):Cd001796. doi:  
43  
44 10.1002/14651858.CD001796.pub3 [published Online First: 2010/08/06]  
45
- 46  
47 15. Jagers J, Hand G, Dudgeon W, et al. Aerobic and resistance training improves mood state  
48  
49 among adults living with HIV. *International journal of sports medicine* 2015;36(02):175-  
50  
51 81.  
52
- 53  
54 16. Neto MG, Conceição CS, Carvalho VO, et al. Effects of combined aerobic and resistance  
55  
56 exercise on exercise capacity, muscle strength and quality of life in HIV-infected  
57  
58 patients: a systematic review and meta-analysis. *PloS one* 2015;10(9):e0138066.  
59  
60

- 1  
2  
3 17. O'Brien KK, Tynan A-M, Nixon SA, et al. Effectiveness of aerobic exercise for adults living  
4 with HIV: systematic review and meta-analysis using the Cochrane Collaboration  
5 protocol. *BMC infectious diseases* 2016;16(1):182.  
6  
7
- 8  
9 18. Fazeli PL, Marquine MJ, Dufour C, et al. Physical Activity is Associated with Better  
10 Neurocognitive and Everyday Functioning Among Older Adults with HIV Disease. *AIDS*  
11 *Behav* 2015;19(8):1470-7. doi: 10.1007/s10461-015-1024-z [published Online First:  
12 2015/03/04]  
13  
14
- 15 19. O'Brien KK, Solomon P, Trentham B, et al. Evidence-informed recommendations for  
16 rehabilitation with older adults living with HIV: a knowledge synthesis. *BMJ Open*  
17 2014;4(5) doi: 10.1136/bmjopen-2013-004692  
18  
19
- 20 20. Vancampfort D, Mugisha J, De Hert M, et al. Sedentary Behavior in People Living With HIV:  
21 A Systematic Review and Meta-Analysis. *Journal of physical activity & health*  
22 2017;14(7):571-77. doi: 10.1123/jpah.2016-0507 [published Online First: 2017/03/16]  
23  
24
- 25 21. Vancampfort D, Mugisha J, De Hert M, et al. Global physical activity levels among people  
26 living with HIV: a systematic review and meta-analysis. *Disabil Rehabil* 2018;40(4):388-  
27 97. doi: 10.1080/09638288.2016.1260645 [published Online First: 2016/12/09]  
28  
29
- 30 22. Sallis JF, Owen N, Fisher E. Ecological models of health behavior. *Health behavior: Theory,*  
31 *research, and practice* 2015;5:43-64.  
32  
33
- 34 23. McLeroy KR, Bibeau D, Steckler A, et al. An ecological perspective on health promotion  
35 programs. *Health education quarterly* 1988;15(4):351-77.  
36  
37
- 38 24. Macera CA, Cavanaugh A, Bellettiere J. State of the art review: Physical activity and older  
39 adults. *American Journal of Lifestyle Medicine* 2017;11(1):42-57.  
40  
41
- 42 25. Trost SG, Owen N, Bauman AE, et al. Correlates of adults' participation in physical activity:  
43 review and update. *Medicine & Science in Sports & Exercise* 2002;34(12):1996-2001.  
44  
45  
46  
47  
48  
49  
50  
51  
52  
53  
54  
55  
56  
57  
58  
59  
60

- 1  
2  
3 26. Bauman AE, Reis RS, Sallis JF, et al. Correlates of physical activity: why are some people  
4 physically active and others not? *Lancet (London, England)* 2012;380(9838):258-71. doi:  
5 10.1016/s0140-6736(12)60735-1 [published Online First: 2012/07/24]  
6  
7  
8  
9 27. Schutzer KA, Graves BS. Barriers and motivations to exercise in older adults. *Preventive*  
10 *medicine* 2004;39(5):1056-61.  
11  
12  
13 28. Simonik A, Vader K, Ellis D, et al. Are you ready? Exploring readiness to engage in exercise  
14 among people living with HIV and multimorbidity in Toronto, Canada: a qualitative study.  
15 *BMJ open* 2016;6(3):e010029.  
16  
17  
18  
19 29. Ley C, Barrio MR, Leach L. Suppl 1: M6: social-ecological, motivational and volitional factors  
20 for initiating and maintaining physical activity in the context of HIV. *The open AIDS*  
21 *journal* 2015;9:96.  
22  
23  
24  
25 30. Webel AR, Perazzo JD, Dawson-Rose C, et al. A multinational qualitative investigation of  
26 the perspectives and drivers of exercise and dietary behaviors in people living with HIV.  
27 *Applied Nursing Research* 2017;37:13-18.  
28  
29  
30  
31 31. Nguyen AL, Lake JE, Reid MC, et al. Attitudes towards exercise among substance using  
32 older adults living with HIV and chronic pain. *AIDS care* 2017;29(9):1149-52. doi:  
33 10.1080/09540121.2017.1325437  
34  
35  
36  
37 32. Roos R, Myezwa H, van Aswegen H. "Not easy at all but I am trying": barriers and  
38 facilitators to physical activity in a South African cohort of people living with HIV  
39 participating in a home-based pedometer walking programme. *AIDS care*  
40 2015;27(2):235-39.  
41  
42  
43  
44 33. Montoya JL, Wing D, Knight A, et al. Development of an mHealth Intervention (iSTEP) to  
45 promote physical activity among people living with HIV. *Journal of the International*  
46 *Association of Providers of AIDS Care (JIAPAC)* 2015;14(6):471-75.  
47  
48  
49  
50  
51  
52  
53  
54  
55  
56  
57  
58  
59  
60

- 1  
2  
3 34. Neff HA, Kellar-Guenther Y, Jankowski CM, et al. Turning disability into ability: barriers and  
4  
5 facilitators to initiating and maintaining exercise among older men living with HIV. *AIDS*  
6  
7 *care* 2018;1-5.  
8  
9  
10 35. Justice AC. HIV and aging: time for a new paradigm. *Current HIV/AIDS Reports*  
11  
12 2010;7(2):69-76.  
13  
14 36. Brown D, Claffey A, Harding R. Evaluation of a physiotherapy-led group rehabilitation  
15  
16 intervention for adults living with HIV: referrals, adherence and outcomes. *AIDS care*  
17  
18 2016;28(12):1495-505. doi: 10.1080/09540121.2016.1191611  
19  
20 37. Nosrat S, Whitworth JW, Ciccolo JT. Exercise and mental health of people living with HIV: A  
21  
22 systematic review. *Chronic illness* 2017;13(4):299-319.  
23  
24 38. Vancampfort D, Mugisha J, Richards J, et al. Physical activity correlates in people living with  
25  
26 HIV/AIDS: a systematic review of 45 studies. *Disability and Rehabilitation*  
27  
28 2018;40(14):1618-29. doi: 10.1080/09638288.2017.1306587  
29  
30 39. Petróczi A, Hawkins K, Jones G, et al. HIV Patient Characteristics that Affect Adherence to  
31  
32 Exercise Programmes: An Observational Study. *The open AIDS journal* 2010;4:148-55.  
33  
34 doi: 10.2174/1874613601004010148  
35  
36 40. McAuley E, Szabo A, Gothe N, et al. Self-efficacy: implications for physical activity, function,  
37  
38 and functional limitations in older adults. *American journal of lifestyle medicine*  
39  
40 2011;5(4):361-69.  
41  
42 41. Koeneman MA, Verheijden MW, Chinapaw MJM, et al. Determinants of physical activity and  
43  
44 exercise in healthy older adults: A systematic review. *International Journal of Behavioral*  
45  
46 *Nutrition and Physical Activity* 2011;8(1):142. doi: 10.1186/1479-5868-8-142  
47  
48 42. Gray L, Chalabaev A, Durant J, et al. Exercise stereotypes and fatigue in people living with  
49  
50 HIV: does self-efficacy play a mediating or a moderating role? *Archives of Public Health*  
51  
52 2018;76(1):23.  
53  
54  
55  
56  
57  
58  
59  
60

- 1  
2  
3 43. Schrimshaw EW, Siegel K. Perceived barriers to social support from family and friends  
4  
5 among older adults with HIV/AIDS. *Journal of Health Psychology* 2003;8(6):738-52.  
6  
7 44. Smith GL, Banting L, Eime R, et al. The association between social support and physical  
8  
9 activity in older adults: a systematic review. *International Journal of Behavioral Nutrition*  
10  
11 *and Physical Activity* 2017;14(1):56.  
12  
13 45. Prince SA, Reed JL, McFetridge C, et al. Correlates of sedentary behaviour in adults: a  
14  
15 systematic review. *Obesity reviews : an official journal of the International Association for*  
16  
17 *the Study of Obesity* 2017;18(8):915-35. doi: 10.1111/obr.12529 [published Online First:  
18  
19 2017/05/20]  
20  
21  
22 46. Thornton CM, Kerr J, Conway TL, et al. Physical Activity in Older Adults: an Ecological  
23  
24 Approach. *Annals of Behavioral Medicine* 2017;51(2):159-69. doi: 10.1007/s12160-016-  
25  
26 9837-1  
27  
28  
29  
30  
31  
32  
33  
34  
35  
36  
37  
38  
39  
40  
41  
42  
43  
44  
45  
46  
47  
48  
49  
50  
51  
52  
53  
54  
55  
56  
57  
58  
59  
60

Table 1. Participant Characteristics

|                                             | Exercising Men<br>(n=11) | Non-exercising<br>Men (n=14) | Women (Non-exercisers<br>and Exercisers, n=4) |
|---------------------------------------------|--------------------------|------------------------------|-----------------------------------------------|
| Age <sup>a</sup>                            | 57 (53, 61)              | 58 (53, 65)                  | 56 (53,61)                                    |
| Race <sup>b</sup>                           |                          |                              |                                               |
| White                                       | 10 (91)                  | 8 (57)                       | 2 (50)                                        |
| Black                                       | 1 (9)                    | 3 (21)                       | 1 (25)                                        |
| Other                                       | 0 (0)                    | 3 (21)                       | 1 (25)                                        |
| Ethnicity <sup>b</sup>                      |                          |                              |                                               |
| Hispanic or Latino                          | 1 (9)                    | 2 (14)                       | 1 (25)                                        |
| Not Hispanic / Unknown                      | 10 (91)                  | 12 (86)                      | 3 (75)                                        |
| Education <sup>b</sup>                      |                          |                              |                                               |
| Some high school                            | 0 (0)                    | 0 (0)                        | 1 (25)                                        |
| High school or equivalent                   | 4 (36)                   | 2 (14)                       | 0 (0)                                         |
| Some college                                | 3 (27)                   | 5 (36)                       | 3 (75)                                        |
| College degree                              | 3 (27)                   | 2 (14)                       | 0 (0)                                         |
| Post-graduate work                          | 1 (9)                    | 5 (36)                       | 0 (0)                                         |
| Employment <sup>b</sup>                     |                          |                              |                                               |
| On disability                               | 6 (55)                   | 4 (29)                       | 0 (0)                                         |
| Unemployed                                  | 0 (0)                    | 5 (36)                       | 3 (75)                                        |
| Retired                                     | 3 (27)                   | 4 (29)                       | 0 (0)                                         |
| Full-time                                   | 2 (18)                   | 2 (14)                       | 0 (0)                                         |
| Part-time                                   | 0 (0)                    | 0 (0)                        | 1 (25)                                        |
| Years since HIV diagnosis <sup>a</sup>      | 20 (14, 27)              | 20 (11, 27)                  | 15 (4,27)                                     |
| Sexual Preference <sup>b</sup>              |                          |                              |                                               |
| Men                                         | 8 (73)                   | 13 (93)                      | 4 (100)                                       |
| Women                                       | 2 (18)                   | 1 (7)                        | 0 (0)                                         |
| Other                                       | 1 (9)                    | 0 (0)                        | 0 (0)                                         |
| Self-Reported Co-morbidities <sup>b,c</sup> |                          |                              |                                               |
| Hypertension                                | 4 (29)                   | 4 (29)                       | 2 (50)                                        |
| Hyperlipidemia                              | 4 (29)                   | 2 (14)                       | 0 (0)                                         |
| Diabetes                                    | 0 (0)                    | 2 (14)                       | 0 (0)                                         |
| Depression / anxiety <sup>b</sup>           | 7 (64)                   | 9 (64)                       | 3 (75)                                        |
| Osteoporosis <sup>b</sup>                   | 0 (0)                    | 1 (7)                        | 0 (0)                                         |

Presented as a) median with interquartile range (IQR) or b) frequency (%).

c. language used on the survey instrument for self-reported co-morbidities was as follows: Have you ever been told by a doctor that you have any of the following medical problems? High blood pressure, high cholesterol, diabetes, depression or anxiety, osteoporosis.

Table 2. Themes, sub-themes, and frequency of times mentioned across focus groups.

| Main Theme                                 | Sub-theme                 | Example                                                                                                                                                                                                                                                                                                                                                                                                                                                                                           | Count of Times Discussed in Each Group |                         |                                           |
|--------------------------------------------|---------------------------|---------------------------------------------------------------------------------------------------------------------------------------------------------------------------------------------------------------------------------------------------------------------------------------------------------------------------------------------------------------------------------------------------------------------------------------------------------------------------------------------------|----------------------------------------|-------------------------|-------------------------------------------|
|                                            |                           |                                                                                                                                                                                                                                                                                                                                                                                                                                                                                                   | Exercising Men N=11                    | Non-exercising Men N=14 | Women (Exercisers and Non-exercisers) N=4 |
| <b>Motivators and benefits to exercise</b> |                           |                                                                                                                                                                                                                                                                                                                                                                                                                                                                                                   |                                        |                         |                                           |
| Intrapersonal                              | Sense of accomplishment   | <p>“For me, yeah. It's a badge of something. It is an achievement”</p> <p>“and I was so proud of myself cause that was the first time that I'd danced in so long”</p> <p>“And I'll set, for instance on my stationary bike how far I'm going to go. And try to achieve that. And I really feel good when I achieve that goal. And probably move it up a little bit the next time”</p>                                                                                                             | 10                                     | 5                       | 0                                         |
|                                            | Health-related motivators | <p>“But I guess one of my goals is that I am self-sufficient and able to live in my own home. We own our own home. I want to be able to stay in my own home. That's important to me”</p> <p>“So it is like yeah, I've got to exercise. Keep eating, but keep exercising so I don't blow up like a balloon. Because if I do, I'm not going to walk again”</p> <p>“If you want to live longer, you have to get a trainer and join a gym. He said lean muscle mass and organ tissue is the key.”</p> | 23                                     | 6                       | 12                                        |
|                                            | Positive mood change      | <p>“For me it is a lot of a reliever of stress. It gives you that freedom in your head. You feel much better, you know?”</p> <p>“And my partner many years ago suggested and encouraged me to find some kind of exercise that I enjoyed. And it was that encouragement that I discovered the pool. And I went over there and to this day, I believe that for some reason, just simply being in the water is like a safe zone for depression.”</p>                                                 | 22                                     | 11                      | 3                                         |
|                                            | Increased energy          | <p>“And by exercising, I find I get a lot more energy than if I'm just sitting around like a couch potato, not doing anything. So...I try to make it a regular part of my life”</p> <p>“I just have lived through a variety of things I could do to improve my vitality and I've found that exercise is the most energizing.”</p>                                                                                                                                                                 | 13                                     | 3                       | 4                                         |
|                                            | Thinking is clearer       | <p>“[when asked to describe how he feels when exercising] Focused and present. Mindful and serene.”</p>                                                                                                                                                                                                                                                                                                                                                                                           | 9                                      | 15                      | 2                                         |



|                             |                                                                                               |                                                                                                                                                                                                                                                                                                                                                                                                                                                                                                                                                                                                                                                                                                                                                                                                                                                              |    |    |    |
|-----------------------------|-----------------------------------------------------------------------------------------------|--------------------------------------------------------------------------------------------------------------------------------------------------------------------------------------------------------------------------------------------------------------------------------------------------------------------------------------------------------------------------------------------------------------------------------------------------------------------------------------------------------------------------------------------------------------------------------------------------------------------------------------------------------------------------------------------------------------------------------------------------------------------------------------------------------------------------------------------------------------|----|----|----|
|                             |                                                                                               |                                                                                                                                                                                                                                                                                                                                                                                                                                                                                                                                                                                                                                                                                                                                                                                                                                                              |    |    |    |
| Interpersonal               | Social activities outside of exercise                                                         | <p>"I've found that if you have a lot of people who are more active, you tend to be more active."</p> <p>"I think the community part of it connects me. So I want to go [to the gym] at the same time cause I know the same people are going to be there. It gets me on that schedule."</p> <p>"And for many years, what got me over to the pool was knowing I would see people that I enjoyed being with. And then I would spend the first hour socializing and you know, we had a routine where we'd visit for quite a while"</p>                                                                                                                                                                                                                                                                                                                          | 12 | 18 | 7  |
| <b>Barriers to exercise</b> |                                                                                               |                                                                                                                                                                                                                                                                                                                                                                                                                                                                                                                                                                                                                                                                                                                                                                                                                                                              |    |    |    |
| Intrapersonal               | Physical health (medication side effects, fatigue, disability, other health responsibilities) | <p>"Well, it's funny that you mention the chemo and stuff, because after I got done with the Interferon for the Hep C treatment, I noticed my energy level was zapped. And even to this day, I'm not back to where I was 7 1/2 years ago, prior to starting that, you know?"</p> <p>"And then I got really sick and I had a lot of problems with my legs and I wasn't really able to walk. And then I had to battle that, even though it was a missed diagnosis. I had a PIC line for 6 months, so I didn't work out for that period either. And so there were medical reasons and drug reasons why I didn't work out."</p> <p>"Well, you know...I'm not very active. I have a spinal thing going on. And...they are probably going to have to operate on. So I've been kind of out of the exercise program...I was in the hospital for about 9 months."</p> | 20 | 36 | 20 |
|                             | Lack of motivation or self-efficacy                                                           | <p>"I mean...trying to get motivated at an older age is difficult cause you do have to be motivated and you do have to be focused. But...it is just not there really..."</p> <p>"So I could go back into something that I feel like I'm comfortable in. But the motivation to believe in myself and to have the ability to know that I can do it again, would probably be the hardest part for me."</p>                                                                                                                                                                                                                                                                                                                                                                                                                                                      | 3  | 21 | 8  |
|                             | Age-related barriers                                                                          | <p>"I think one of the biggest problems with gyms today, they are activities. And there are a lot of them that are ...their focus is younger people. They don't have age related...they don't cater to, you know, the broader demographics of society"</p> <p>"That's why I don't play any hockey because it would take me a week to recuperate. When you are younger, it takes a couple hours and you are good to go."</p>                                                                                                                                                                                                                                                                                                                                                                                                                                  | 3  | 17 | 9  |

|                               |                                                                                                  |                                                                                                                                                                                                                                                                                                                                                                                                                                                                                                                                                |    |    |    |
|-------------------------------|--------------------------------------------------------------------------------------------------|------------------------------------------------------------------------------------------------------------------------------------------------------------------------------------------------------------------------------------------------------------------------------------------------------------------------------------------------------------------------------------------------------------------------------------------------------------------------------------------------------------------------------------------------|----|----|----|
| Interpersonal                 | Social factors (caregiver burden, lack of social group, lack of support from family and friends) | <p>“But I'm finding myself more and more and more just staying in the apartment for a number of reasons. Number one, I don't have anybody to do anything with.”</p> <p>“Yeah. I have a problem with accountability. Doing it by myself is hard to do.”</p>                                                                                                                                                                                                                                                                                     | 9  | 3  | 10 |
| Environmental                 | Comfort at the gym                                                                               | <p>“I don't want to get naked at the gym anymore and I like getting naked to use the facility. I mean you know, you take a shower and you take a steam. But I just don't want to do it anymore.”</p> <p>“But I got so embarrassed because there were probably mostly women. Elderly. And they would hand the pin at #10 to be able to do each machine. And I couldn't do 10. So I would ...So I would sit down and watch the women. And they would see...I got so embarrassed...so I would deliberately put it back to 10 and I was done.”</p> | 2  | 10 | 5  |
|                               | Gym culture                                                                                      | <p>“I always assume I am going to be sold. Like there is going to be a sales person there at the gym of some sort, that is going to sell me on some package or something... They aren't really concerned about my needs but what they can get out of me.”</p>                                                                                                                                                                                                                                                                                  | 3  | 23 | 1  |
| <b>Ideal gym / next steps</b> |                                                                                                  |                                                                                                                                                                                                                                                                                                                                                                                                                                                                                                                                                |    |    |    |
| Facility level factors        | Cost                                                                                             | <p>“Back when I used to go to the gym, to the public gym, the charges were like 5.00 a year or something...but man, it is hundreds of dollars now.”</p> <p>“Again, feel the same. I look at exercise...going to a gym. I wouldn't mind going to a gym...if I could afford it.”</p>                                                                                                                                                                                                                                                             | 11 | 14 | 5  |
|                               | Amenities (age appropriate and varied activities, instructions, good facilities)                 | <p>“So maybe have like the ones that cater to the 20 to 30, maybe 30 to 40 and someone that caters to the 40 to 40 plus year olds?”</p> <p>“I'd much rather not ask questions about something. Like if the machine had a basic sign that it is used for this. And best to be used after this...kind of a 5 point user's manual.”</p> <p>“I like a clean gym where things are working, you know? Where parking is easy.”</p>                                                                                                                    | 3  | 11 | 2  |
| Social factors                | Who is at the gym                                                                                | <p>“I just want to be by myself at the gym...I mean if they had a gym for HIV, I still wouldn't go because why advertise it?”</p> <p>“...having people around you that are of a similar age...you don't feel...I don't know if it's threatened or whatever, but you just feel more at ease. You know?”</p> <p>“I need a place where I can talk about HIV”</p>                                                                                                                                                                                  | 12 | 21 | 3  |

|  |                            |                                                                                                                                                                                                                                                                                                                                                                                                                                                                                                              |    |    |    |
|--|----------------------------|--------------------------------------------------------------------------------------------------------------------------------------------------------------------------------------------------------------------------------------------------------------------------------------------------------------------------------------------------------------------------------------------------------------------------------------------------------------------------------------------------------------|----|----|----|
|  | Interpersonal interactions | <p>“Yeah. Yeah. Again, the gym is not going to miss you, if you don't show up. But if you've got a buddy, he might give you a call and go where the hell are you?”</p> <p>“And I think that there is a social aspect to it. I don't like competition with other people. But I like being around other people and sharing the same kind of things that they do.”</p> <p>“Yeah. A little check in with people. How are you doing? How's your work out? And just whatever conversation it is. I like that.”</p> | 40 | 25 | 11 |
|--|----------------------------|--------------------------------------------------------------------------------------------------------------------------------------------------------------------------------------------------------------------------------------------------------------------------------------------------------------------------------------------------------------------------------------------------------------------------------------------------------------------------------------------------------------|----|----|----|

For peer review only

# Reporting checklist for qualitative study.

Based on the SRQR guidelines.

## Instructions to authors

Complete this checklist by entering the page numbers from your manuscript where readers will find each of the items listed below.

Your article may not currently address all the items on the checklist. Please modify your text to include the missing information. If you are certain that an item does not apply, please write "n/a" and provide a short explanation.

Upload your completed checklist as an extra file when you submit to a journal.

In your methods section, say that you used the SRQR reporting guidelines, and cite them as:

O'Brien BC, Harris IB, Beckman TJ, Reed DA, Cook DA. Standards for reporting qualitative research: a synthesis of recommendations. *Acad Med.* 2014;89(9):1245-1251.

|                                            | Reporting Item                                                                                                                                                                                                                                          | Page Number |
|--------------------------------------------|---------------------------------------------------------------------------------------------------------------------------------------------------------------------------------------------------------------------------------------------------------|-------------|
|                                            | <a href="#">#1</a> Concise description of the nature and topic of the study identifying the study as qualitative or indicating the approach (e.g. ethnography, grounded theory) or data collection methods (e.g. interview, focus group) is recommended | 5-7         |
|                                            | <a href="#">#2</a> Summary of the key elements of the study using the abstract format of the intended publication; typically includes background, purpose, methods, results and conclusions                                                             | 3-4         |
| Problem formulation                        | <a href="#">#3</a> Description and significance of the problem / phenomenon studied: review of relevant theory and empirical work; problem statement                                                                                                    | 5-6         |
| Purpose or research question               | <a href="#">#4</a> Purpose of the study and specific objectives or questions                                                                                                                                                                            | 6           |
| Qualitative approach and research paradigm | <a href="#">#5</a> Qualitative approach (e.g. ethnography, grounded theory, case study, phenomenology, narrative research) and                                                                                                                          | 7           |

guiding theory if appropriate; identifying the research paradigm (e.g. postpositivist, constructivist / interpretivist) is also recommended; rationale. The rationale should briefly discuss the justification for choosing that theory, approach, method or technique rather than other options available; the assumptions and limitations implicit in those choices and how those choices influence study conclusions and transferability. As appropriate the rationale for several items might be discussed together.

|    |                           |                                                                                                                                                                                                                                                                                                                                                      |          |
|----|---------------------------|------------------------------------------------------------------------------------------------------------------------------------------------------------------------------------------------------------------------------------------------------------------------------------------------------------------------------------------------------|----------|
| 1  |                           |                                                                                                                                                                                                                                                                                                                                                      |          |
| 2  |                           |                                                                                                                                                                                                                                                                                                                                                      |          |
| 3  |                           |                                                                                                                                                                                                                                                                                                                                                      |          |
| 4  |                           |                                                                                                                                                                                                                                                                                                                                                      |          |
| 5  |                           |                                                                                                                                                                                                                                                                                                                                                      |          |
| 6  |                           |                                                                                                                                                                                                                                                                                                                                                      |          |
| 7  |                           |                                                                                                                                                                                                                                                                                                                                                      |          |
| 8  |                           |                                                                                                                                                                                                                                                                                                                                                      |          |
| 9  |                           |                                                                                                                                                                                                                                                                                                                                                      |          |
| 10 |                           |                                                                                                                                                                                                                                                                                                                                                      |          |
| 11 |                           |                                                                                                                                                                                                                                                                                                                                                      |          |
| 12 |                           |                                                                                                                                                                                                                                                                                                                                                      |          |
| 13 |                           |                                                                                                                                                                                                                                                                                                                                                      |          |
| 14 | Researcher                | <a href="#">#6</a>                                                                                                                                                                                                                                                                                                                                   | 6        |
| 15 | characteristics and       |                                                                                                                                                                                                                                                                                                                                                      |          |
| 16 | reflexivity               | Researchers' characteristics that may influence the research, including personal attributes, qualifications / experience, relationship with participants, assumptions and / or presuppositions; potential or actual interaction between researchers' characteristics and the research questions, approach, methods, results and / or transferability |          |
| 17 |                           |                                                                                                                                                                                                                                                                                                                                                      |          |
| 18 |                           |                                                                                                                                                                                                                                                                                                                                                      |          |
| 19 |                           |                                                                                                                                                                                                                                                                                                                                                      |          |
| 20 |                           |                                                                                                                                                                                                                                                                                                                                                      |          |
| 21 |                           |                                                                                                                                                                                                                                                                                                                                                      |          |
| 22 |                           |                                                                                                                                                                                                                                                                                                                                                      |          |
| 23 |                           |                                                                                                                                                                                                                                                                                                                                                      |          |
| 24 |                           |                                                                                                                                                                                                                                                                                                                                                      |          |
| 25 | Context                   | <a href="#">#7</a>                                                                                                                                                                                                                                                                                                                                   |          |
| 26 |                           | Setting / site and salient contextual factors; rationale                                                                                                                                                                                                                                                                                             |          |
| 27 |                           |                                                                                                                                                                                                                                                                                                                                                      |          |
| 28 | Sampling strategy         | <a href="#">#8</a>                                                                                                                                                                                                                                                                                                                                   | 6        |
| 29 |                           | How and why research participants, documents, or events were selected; criteria for deciding when no further sampling was necessary (e.g. sampling saturation); rationale                                                                                                                                                                            |          |
| 30 |                           |                                                                                                                                                                                                                                                                                                                                                      |          |
| 31 |                           |                                                                                                                                                                                                                                                                                                                                                      |          |
| 32 |                           |                                                                                                                                                                                                                                                                                                                                                      |          |
| 33 |                           |                                                                                                                                                                                                                                                                                                                                                      |          |
| 34 |                           |                                                                                                                                                                                                                                                                                                                                                      |          |
| 35 | Ethical issues pertaining | <a href="#">#9</a>                                                                                                                                                                                                                                                                                                                                   | 6        |
| 36 | to human subjects         | Documentation of approval by an appropriate ethics review board and participant consent, or explanation for lack thereof; other confidentiality and data security issues                                                                                                                                                                             |          |
| 37 |                           |                                                                                                                                                                                                                                                                                                                                                      |          |
| 38 |                           |                                                                                                                                                                                                                                                                                                                                                      |          |
| 39 |                           |                                                                                                                                                                                                                                                                                                                                                      |          |
| 40 | Data collection methods   | <a href="#">#10</a>                                                                                                                                                                                                                                                                                                                                  | 6        |
| 41 |                           | Types of data collected; details of data collection procedures including (as appropriate) start and stop dates of data collection and analysis, iterative process, triangulation of sources / methods, and modification of procedures in response to evolving study findings; rationale                                                              |          |
| 42 |                           |                                                                                                                                                                                                                                                                                                                                                      |          |
| 43 |                           |                                                                                                                                                                                                                                                                                                                                                      |          |
| 44 |                           |                                                                                                                                                                                                                                                                                                                                                      |          |
| 45 |                           |                                                                                                                                                                                                                                                                                                                                                      |          |
| 46 |                           |                                                                                                                                                                                                                                                                                                                                                      |          |
| 47 |                           |                                                                                                                                                                                                                                                                                                                                                      |          |
| 48 |                           |                                                                                                                                                                                                                                                                                                                                                      |          |
| 49 |                           |                                                                                                                                                                                                                                                                                                                                                      |          |
| 50 | Data collection           | <a href="#">#11</a>                                                                                                                                                                                                                                                                                                                                  | 6-7      |
| 51 | instruments and           | Description of instruments (e.g. interview guides, questionnaires) and devices (e.g. audio recorders) used for data collection; if / how the instruments(s) changed over the course of the study                                                                                                                                                     |          |
| 52 | technologies              |                                                                                                                                                                                                                                                                                                                                                      |          |
| 53 |                           |                                                                                                                                                                                                                                                                                                                                                      |          |
| 54 |                           |                                                                                                                                                                                                                                                                                                                                                      |          |
| 55 |                           |                                                                                                                                                                                                                                                                                                                                                      |          |
| 56 |                           |                                                                                                                                                                                                                                                                                                                                                      |          |
| 57 | Units of study            | <a href="#">#12</a>                                                                                                                                                                                                                                                                                                                                  | 8, table |
| 58 |                           | Number and relevant characteristics of participants, documents, or events included in the study; level of                                                                                                                                                                                                                                            | 1        |
| 59 |                           |                                                                                                                                                                                                                                                                                                                                                      |          |
| 60 |                           |                                                                                                                                                                                                                                                                                                                                                      |          |

participation (could be reported in results)

|    |                              |                     |      |
|----|------------------------------|---------------------|------|
| 1  |                              |                     |      |
| 2  |                              |                     |      |
| 3  | Data processing              | <a href="#">#13</a> | 6-7  |
| 4  |                              |                     |      |
| 5  |                              |                     |      |
| 6  |                              |                     |      |
| 7  |                              |                     |      |
| 8  |                              |                     |      |
| 9  | Data analysis                | <a href="#">#14</a> | 6-7  |
| 10 |                              |                     |      |
| 11 |                              |                     |      |
| 12 |                              |                     |      |
| 13 |                              |                     |      |
| 14 |                              |                     |      |
| 15 |                              |                     |      |
| 16 | Techniques to enhance        | <a href="#">#15</a> | 7    |
| 17 | trustworthiness              |                     |      |
| 18 |                              |                     |      |
| 19 |                              |                     |      |
| 20 |                              |                     |      |
| 21 | Syntheses and                | <a href="#">#16</a> | 8-12 |
| 22 | interpretation               |                     |      |
| 23 |                              |                     |      |
| 24 |                              |                     |      |
| 25 |                              |                     |      |
| 26 |                              |                     |      |
| 27 | Links to empirical data      | <a href="#">#17</a> | 8-12 |
| 28 |                              |                     |      |
| 29 |                              |                     |      |
| 30 |                              |                     |      |
| 31 | Intergration with prior      | <a href="#">#18</a> | 13   |
| 32 | work, implications,          |                     |      |
| 33 | transferability and          |                     |      |
| 34 | contribution(s) to the field |                     |      |
| 35 |                              |                     |      |
| 36 |                              |                     |      |
| 37 |                              |                     |      |
| 38 |                              |                     |      |
| 39 |                              |                     |      |
| 40 | Limitations                  | <a href="#">#19</a> | 16   |
| 41 |                              |                     |      |
| 42 |                              |                     |      |
| 43 | Conflicts of interest        | <a href="#">#20</a> | 7    |
| 44 |                              |                     |      |
| 45 |                              |                     |      |
| 46 |                              |                     |      |
| 47 |                              |                     |      |
| 48 | Funding                      | <a href="#">#21</a> | 17   |
| 49 |                              |                     |      |
| 50 |                              |                     |      |

The SRQR checklist is distributed with permission of Wolters Kluwer © 2014 by the Association of American Medical Colleges. This checklist can be completed online using <https://www.goodreports.org/>, a tool made by the [EQUATOR Network](#) in collaboration with [Penelope.ai](#)
